# Supplementary material for: Knowledge and practice of nurses with respect to perioperative hypothermia prevention in the Northwest Amhara Regional State Referral Hospitals, Ethiopia: a cross-sectional study
Source: PubMed Central journal article supplement — BMJ Open. 2023 Dec 13;13(12):e068131. doi: 10.1136/bmjopen-2022-068131 (PMC10729143; doi:10.1136/bmjopen-2022-068131), 2023-12-13
Supplement: bmjopen-2022-068131.draft_revisions.pdf [file bmjopen-2022-068131.draft_revisions.pdf]

# BMJ Open

BMJ Open is committed to open peer review. As part of this commitment we make the peer review history of every article we publish publicly available.

When an article is published we post the peer reviewers' comments and the authors' responses online. We also post the versions of the paper that were used during peer review. These are the versions that the peer review comments apply to.

The versions of the paper that follow are the versions that were submitted during the peer review process. They are not the versions of record or the final published versions. They should not be cited or distributed as the published version of this manuscript.

BMJ Open is an open access journal and the full, final, typeset and author-corrected version of record of the manuscript is available on our site with no access controls, subscription charges or pay-per-view fees (<http://bmjopen.bmj.com>).

If you have any questions on BMJ Open's open peer review process please email [info.bmjopen@bmj.com](mailto:info.bmjopen@bmj.com)

# BMJ Open

## Nurses' Knowledge, Practice, and their Associated Factors regarding Perioperative Hypothermia Prevention at Northwest Amhara Regional State Referral Hospitals, Northwest Ethiopia

|                               |                                                                                                                                                                                                                                                                                                                                                                                                                                                      |
|-------------------------------|------------------------------------------------------------------------------------------------------------------------------------------------------------------------------------------------------------------------------------------------------------------------------------------------------------------------------------------------------------------------------------------------------------------------------------------------------|
| Journal:                      | <i>BMJ Open</i>                                                                                                                                                                                                                                                                                                                                                                                                                                      |
| Manuscript ID                 | bmjopen-2022-068131                                                                                                                                                                                                                                                                                                                                                                                                                                  |
| Article Type:                 | Original research                                                                                                                                                                                                                                                                                                                                                                                                                                    |
| Date Submitted by the Author: | 15-Sep-2022                                                                                                                                                                                                                                                                                                                                                                                                                                          |
| Complete List of Authors:     | Woretaw, Ashenafi; University of Gondar College of Medicine and Health Sciences, Surgical Nursing Department<br>Yimer Mekkonen, Bezenaw; University of Gondar, Emergency and Critical Care Nursing Department<br>Tsegaye, Netsanet; University of Gondar College of Medicine and Health Sciences, Emergency and Critical Care nursing<br>Dellie, Endalkachew; University of Gondar College of Medicine and Health Sciences, Health System and policy |
| Keywords:                     | NUTRITION & DIETETICS, PAIN MANAGEMENT, SURGERY                                                                                                                                                                                                                                                                                                                                                                                                      |
|                               |                                                                                                                                                                                                                                                                                                                                                                                                                                                      |

SCHOLARONE™  
Manuscripts

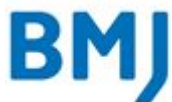

I, the Submitting Author has the right to grant and does grant on behalf of all authors of the Work (as defined in the below author licence), an exclusive licence and/or a non-exclusive licence for contributions from authors who are: i) UK Crown employees; ii) where BMJ has agreed a CC-BY licence shall apply, and/or iii) in accordance with the terms applicable for US Federal Government officers or employees acting as part of their official duties; on a worldwide, perpetual, irrevocable, royalty-free basis to BMJ Publishing Group Ltd ("BMJ") its licensees and where the relevant Journal is co-owned by BMJ to the co-owners of the Journal, to publish the Work in this journal and any other BMJ products and to exploit all rights, as set out in our [licence](#).

The Submitting Author accepts and understands that any supply made under these terms is made by BMJ to the Submitting Author unless you are acting as an employee on behalf of your employer or a postgraduate student of an affiliated institution which is paying any applicable article publishing charge ("APC") for Open Access articles. Where the Submitting Author wishes to make the Work available on an Open Access basis (and intends to pay the relevant APC), the terms of reuse of such Open Access shall be governed by a Creative Commons licence – details of these licences and which [Creative Commons](#) licence will apply to this Work are set out in our licence referred to above.

Other than as permitted in any relevant BMJ Author's Self Archiving Policies, I confirm this Work has not been accepted for publication elsewhere, is not being considered for publication elsewhere and does not duplicate material already published. I confirm all authors consent to publication of this Work and authorise the granting of this licence.

1  
2  
3 1 **Nurses' Knowledge, Practice, and their Associated Factors regarding Perioperative**  
4 **Hypothermia Prevention at Northwest Amhara Regional State Referral Hospitals,**  
5 **Northwest Ethiopia**  
6  
7  
8

9 4 Ashenafi Worku Woretaw<sup>1</sup>, Bezenaw Yimer Mekkonen <sup>2</sup>, Netsanet Tsegaye<sup>2</sup>, and <sup>3</sup>Endalkachew  
10  
11 5 Dellie  
12

13 6 <sup>1</sup>Department of Surgical Nursing, School of Nursing, College of Medicine and Health Sciences,  
14 University of Gondar, Gondar, Ethiopia;

15 7  
16 8 <sup>2</sup>Department of Emergency and Critical Care Nursing, School of Nursing, College of Medicine  
17 and Health Sciences, University of Gondar, Gondar, Ethiopia

18 9  
19 10 <sup>3</sup>Department of Health Systems and Policy, Institute of Public Health, College of Medicine and  
20 Health Sciences, University of Gondar, Gondar, Ethiopia.  
21  
22

23  
24 12 **Email addresses:**

25  
26 13 Ashenafi Worku Woretaw (AWW): [ashuw2007@gmail.com](mailto:ashuw2007@gmail.com)

27  
28 14 Institutional email: [Ashenafi.Worku@uog.edu.et](mailto:Ashenafi.Worku@uog.edu.et)

29  
30 15 Bezenaw Yimer Mekkonen (BY): [bezyim2007@gmail.com](mailto:bezyim2007@gmail.com)

31  
32 16 Netsanet Tsegaye (NT): [netsanet.gondar@gmail.com](mailto:netsanet.gondar@gmail.com)

33  
34 17 Endalkachew Dellie (ED): [endalkd.07@gmail.com](mailto:endalkd.07@gmail.com)

35  
36  
37 18 **\*Correspondence author:**

38  
39 19 AWW: [ashuw2007@gmail.com](mailto:ashuw2007@gmail.com)

40  
41 20 PO Box: 196, University of Gondar, Gondar, Ethiopia

42  
43 21 **Word count:** 4,745 (Introduction to conclusion; excluding tables and figure). The number of  
44 words exceeds 4000 because of further elaboration of the study setting.  
45  
46  
47  
48  
49  
50  
51  
52  
53  
54  
55  
56  
57  
58  
59  
60

## 28 **Abstract**

29 **Introduction:** Hypothermia is a health problem that is characterized as a body temperature below  
30 36 °c (96.8°F) and it is a common problem associated with perioperative patients, which can cause  
31 decelerates all physiologic roles. Therefore, nurses must strive to ensure normothermia for all  
32 patients.

33 **Objectives:** To assess nurses' knowledge, practices, and associated factors toward perioperative  
34 hypothermia prevention at Northwest Amhara Regional State Referral Hospitals, Northwest  
35 Ethiopia.

36 **Method:** Institution-based cross-sectional study was conducted to collect data from 423 nurses  
37 working in perioperative units by using stratified sampling technique. The collected data were  
38 checked for any inconsistency, coded and entered by using EPI INFO version 7, and analyzed by  
39 using SPSS version 25. To identify factors for dependent variables, bivariate and multivariate  
40 logistic regression models were fitted. Model fitness was checked using the Hosmer Lemeshow  
41 goodness of fit test.

42 **Results:** A total of 244 (59.1%) of the respondents had good knowledge and 208 (50.4%) had  
43 good practice in perioperative hypothermia prevention. Factors affecting nurses' knowledge on  
44 prevention of perioperative hypothermia were being male [AOR = 1.61,95% CI (1.02-2.53)],  
45 having a bachelor, and master's degree [AOR = 2.50; 95% CI (1.25-5.00), and 4.39; (1.45-13.20)]  
46 respectively, and took training [AOR = 3.68; 95% CI (2.14-6.33)]. Whereas nurses who were  
47 working in recovery and intensive care units [AOR = 2.87; 95% CI (1.08-7.58), and 2.39; 95% CI  
48 (1.09-5.22)] respectively, took training [AOR = 2.64; 95% CI (1.53-4.57)], had a Job satisfaction  
49 [AOR 2.15; 95% CI (1.34-3.43)], and knowledgeable nurses [AOR 2.64; 95% CI (1.63-4.27)] were  
50 factors affecting nurse's practice on perioperative hypothermia prevention.

51 **Conclusion and recommendation:** Nurses' knowledge and practice regarding prevention of  
52 perioperative hypothermia were found to be inadequate. So, it is better to strengthen training,  
53 educational opportunity, equip wards with standardized guidelines and materials, and motivate and  
54 create a safe working environment.

55  
56 **Keywords:** Perioperative hypothermia, Ethiopia, Knowledge, Practice, Nurses.

## 57 **Limitations and Strength of the study**

- 58     ▪ Due to the time constraint, observational data collection method was not done.
  - 59     ▪ Furthermore, this study was not triangulated with the qualitative method
  - 60     ▪ Due to the limited availability of literature, I have used unpublished sources.
- 61 ✓ Despite these limitations, this study clearly showed nurses' knowledge, practice, and associated  
62 factors toward perioperative hypothermia prevention for the first time in Ethiopia.

## 63 **Background**

64 Hypothermia is a common health problem in patients having surgery, that is characterized as a  
65 body temperature below 36 °c (96.8°F) and it is usually caused by too much heat loss from cold  
66 weather exposure, anesthetic effect, and administration of cold intravenous, or irrigation fluids (1-  
67 3). Hypothermia decelerates all physiologic roles including metabolic rate, mental awareness,  
68 nerve conduction, neuromuscular reaction times, and both the cardiovascular and respiratory  
69 systems, consequently disturbing patients' comfort and leading to longer hospitalizations, higher  
70 costs, and increased mortality (1, 4).

71 Different studies conducted in different areas revealed that the incidence of perioperative  
72 hypothermia in Germany, about 25%–90% (5), in brazil 69.8% (6), and in china ranged from  
73 44.3% to 72.7% (7, 8). And also in Ethiopia, the study conducted in Tikur Anbessa Specialized  
74 Hospital the overall magnitude of preoperative, intraoperative, and postoperative hypothermia  
75 were 16.2%, 53.2%, and 31.3%, respectively (9) while, in UoGCSRH the incidence of Pre, Intra,  
76 and post-operative hypothermia were 23.4%, 49.7%, and 50.6% respectively (10).

77 According to the Association of Perioperative Register Nurses (AORN) Guideline, nurses need to  
78 have knowledge and skill on hypothermia prevention at the perioperative phase. This includes  
79 measuring the patient's body temperature, selecting methods for prevention of unintended  
80 hypothermia, and implementing the selected insulation and warming interventions (11). Warming  
81 intervention measures include warming the patient before surgery ("pre-warming"), during  
82 surgery, and after surgery by using passive insulation methods include warmed cotton blankets,  
83 surgical draping and thermal garments, and by using active warming techniques include forced-air  
84 warming devices, electric warming blankets, and warmed fluids including blood products and  
85 using irrigation solutions and gases (12, 13).

1  
2  
3 86 Preventing heat loss and maintaining normothermia are important nursing care in an early phase  
4  
5 87 of resuscitation as metabolic changes accompanied by injury cannot be corrected when patients  
6  
7 88 are in hypothermic status (14). Nurses need to be cognizant of the risks associated with each  
8  
9 89 perioperative phase of the patient in the prevention of hypothermia(15). Preserving a normal body  
10  
11 90 temperature during the surgical experience enhances the patient's chance of preventing  
12  
13 91 postoperative complications (16).

14  
15 92 Different evidence reported that the maintenance of normothermia decreases the length of  
16  
17 93 hospitalization by approximately up to 40%, risk of surgical site infection by 64%, may prevent  
18  
19 94 the costs of potential stay in the intensive care unit by \$1,000 and a prolonged hospital stay by  
20  
21 95 \$465 per day, and also decreasing mortality rate by four folds (17-19). But available literature  
22  
23 96 shows that nurses' knowledge and practice towards perioperative hypothermia prevention is low  
24  
25 97 despite the high incidence, serious consequences, and availability of effective interventions to  
26  
27 98 prevent and treat this frequent surgical complication (2, 20).

28  
29 99 If nurses had not adequate knowledge and skill on the prevention of perioperative hypothermia, its  
30  
31 100 occurrence is inevitable. Even if nurses knowledge and practice are important in prevention of  
32  
33 101 perioperative hypothermia and its complication, available literature revealed that nurses had  
34  
35 102 significant knowledge and practice gaps (30). Different socio-demographic and institutional  
36  
37 103 factors which include age, marital status, educational level, work experience, presence of  
38  
39 104 guidelines and risk assessment protocol, taking training, reading updated evidence, and job  
40  
41 105 satisfaction affect nurses' knowledge and practice (2, 20-22).

42  
43 106 In Ethiopia, there are no studies is available regarding nurses' knowledge and practice on  
44  
45 107 perioperative hypothermia prevention. Therefore, the purpose of this study is to assess nurses'  
46  
47 108 knowledge, practice, and their determinant factors of perioperative hypothermia prevention in  
48  
49 109 Northwest Amhara Regional State Referral Hospitals, Northwest Ethiopia.

## 50 51 110 **Methods**

### 52 53 111 **Study design and period**

54  
55 112 Institutional based cross-sectional study was conducted in perioperative units/wards of five referral  
56  
57 113 hospitals from March 25-May 20/2021.

## 114 Study area

115 The study was conducted in Northwest Amhara Regional State Referral Hospitals, Northwest  
116 Ethiopia. Northwest Amhara is found in the northwestern part of Ethiopia. There are five  
117 government referral hospitals in Northwest Amhara regional state such as University of Gondar  
118 Comprehensive Specialized Referral Hospital (UoGCSRH), Felegehiwot Referral Hospital  
119 (FHRH), Tibebeqion Specialized Referral Hospital (TGSRH), Debre Markos Referral Hospital  
120 (DMRH), and Debre Tabor Comprehensive Referral Hospital (DTCRH). All hospitals provide  
121 outpatient and inpatient services for more than 22,000,000 million people living in their catchment  
122 area. According to information obtained from the administrative offices of these hospitals, there  
123 are 1682 nurses, who provide services. Among those 725 nurses are working in an emergency  
124 ward including trauma unit, operation room, recovery ward, surgical ward, orthopedics ward, and  
125 surgical ICU (42-46).

126 UoGCSRH is a teaching hospital, which is located in Gondar town. Gondar is the capital city of  
127 the central Gondar zone and is the famous historical town in northwest Ethiopia with latitude and  
128 longitude locations of 120 3'N and 370 28'E respectively. It is 748 km away from Addis Abeba  
129 and 173 km from Bahir Dar. Gondar town has one governmental hospital, eight health centers, and  
130 other private health facilities which provide health care service to the community. UoGCSRH was  
131 established in 1954 and provide serves approximately 7 million people. According to the hospital  
132 human resource administration report in 2021, the hospital has 595 nurse staff among those 153  
133 nurses who are working in a surgical emergency (including trauma), operation room, recovery  
134 ward, surgical ward, orthopedics ward, and also surgical ICU (42).

135 DMRH is located 299km from Addis Abeba and 265km from Bahir Dar. Its geographical location  
136 is 10° 11' N latitude and 37° 43' E longitude. The town has one governmental hospital and four  
137 health centers. DMRH potentially serves more than 5,000,000 people of the East Gojjam zone.  
138 According to the hospital human resource administration report in 2021, the hospital has 221 nurse  
139 staff among those 127 nurses who are working in emergency, operation room, recovery ward,  
140 surgical ward, orthopedics ward, and also surgical ICU (43).

141 DTCRH is located in the Debre Tabor town of the South Gondar zone of the Amhara region,  
142 654km far from the Northcentral of Addis Abeba, which is the capital city of Ethiopia, and 108km  
143 to the east of Bahir Dar. The town has a latitude and longitude of 11°51' N38°1'E with an elevation



1  
2  
3 144 of 2,706m above sea level. Debre Tabor referral hospital provides health care services for more  
4  
5 145 than 2 million populations. According to the hospital human resource administration report in  
6  
7 146 2021, the hospital has 156 nurses staff among those 81 nurses who are working in emergency,  
8  
9 147 operation room, recovery ward, surgical ward, orthopedics ward, and also ICU ward (44).

10  
11 148 FHRH is located in Bahir Dar the capital city of Amhara region. The city is located approximately  
12  
13 149 565km northwest of Addis Abeba having a latitude of 11° 38' North, a longitude of 37°15' east,  
14  
15 150 and elevation 1840 above sea level. Bahir Dar city has three governmental hospitals and nine health  
16  
17 151 centers. In addition, there are also private health facilities (including hospitals and higher clinics)  
18  
19 152 that provide health care services to the community. According to the hospital human resource  
20  
21 153 administration report in 2021, Felegehiwot referral hospital has 430 nurse staffs among those 220  
22  
23 154 nurses who are working in emergency, operation room, recovery ward, surgical ward, orthopedics  
24  
25 155 ward, and also surgical ICU ward (45).

26  
27 156 TGSRH is a new hospital and located on the outskirts of the vibrant Bahir Dar city (one of the ten most  
28  
29 157 beautiful cities in Africa and one of the twelve UNESCO Learning Cities Awardees of 2015). It also  
30  
31 158 far about 10km south of the city center and about 7 km from the new bus station (Addisu Meneharia)  
32  
33 159 on the way to Adet district and about 23 km from the Blue Nile Falls. According to the hospital human  
34  
35 160 resource administration report in 2021, the hospital has 280 nurse staff among those 144 nurses  
36  
37 161 who are working in emergency, operation room, recovery ward, surgical ward, orthopedics ward,  
38  
39 162 and also surgical ICU ward (46).

### 163 **Source population**

40 164 Source populations were all nurses who were working in emergency, operation room, recovery  
41  
42 165 ward, surgical ward, orthopedics ward, and surgical ICU ward of Northwest Amhara Regional  
43  
44 166 State Referral Hospitals, Northwest Ethiopia.

### 167 **Study population**

47 168 The study population included nurses who were working in emergency ward including trauma  
48  
49 169 unit, operation room, recovery ward, surgical ward, orthopedics ward, and surgical ICU wards of  
50  
51 170 UoGCSRH, DTCRH, DMRH, TGRH, and FHRH during the data collection period.

### 171 **Sample size and sampling procedure**

## 172 **Sample size**

173 The sample size of the study was calculated using the formula for the estimation of a single  
174 population proportion and the assumptions were the proportion of knowledge and practice of  
175 nurses regarding hypothermia prevention was 50% (since there was no study conducted in our  
176 country), with 95% level of confidence and 5% margin of error. By using a z-value of 1.96 at 95%  
177 CI the minimum sample size for this study was:

$$178 \text{ As: } n = Z^2 \alpha / 2^2 * P (1-P) / d^2$$

179  $n$  = sample size

180  $p$  = proportion of knowledge & practice of nurses on hypothermia prevention =0.5

181  $d$  = maximum allowable error (margin of error) = 0.05

182  $Z$  = value of standard normal distribution at 95% confidence level ( $z=1.96$ ).

$$183 n = (1.96)^2 (0.5) (1-0.5) / (0.05)^2 = 384 \text{ subjects;}$$

184  $\Rightarrow$  By adding 10% allowance for non-response rate the total sample size were  $384+10\%=423$

## 185 **Sampling procedure**

186 The study was performed on nurses who were working at the emergency surgical (including  
187 trauma unit), operating theatre room, recovery ward, surgical ward, orthopedics ward, and surgical  
188 ICU ward of Northwest Amhara Regional State Referral Hospitals, Northwest Ethiopia. A  
189 stratified sampling technique was employed to recruit the required participant for the study. First,  
190 the study participants are stratified from each hospital and working ward/unit and allocated the  
191 required sample for each stratum proportionally. According to all hospitals of human resources,  
192 administration reports the total number of nurses who were working in these units or wards was  
193 725. Based on the number of nurses working in each hospital, 423 samples were proportionally  
194 allocated from 725 (from 153 - 89 in UoGCSRH, from 144 - 84 in TGRH, from 220 - 128 in FHRH,  
195 from 81 - 48 in DTRH, and 127 - 74 in DMRH). Finally, those participants were taken by lottery  
196 method of simple random sampling technique from each sampling frame (Figure 1).

## 197 **Eligibility criteria**

## 198 **Inclusion Criteria**

199 All nurses who were working in the surgical emergency, operating theatre room, recovery ward,  
200 surgical ICU, surgical & orthopedic ward of Northwest Amhara Regional State Referral Hospitals,  
201 Northwest Ethiopia during the time of data collection.

### 202 **Exclusion Criteria**

203 Matron and ward coordinator nurses were excluded because those nurses are primarily responsible  
204 is coordinating, monitoring, and evaluating the staff nurses rather they doing routine activities.

### 205 **Operational definitions**

206 **Knowledge:** Is theoretical or practical understanding of hypothermia and its prevention method  
207 through education or experience. Based on this research the percentage scores were graded as  
208 'poor', and 'good to determine the knowledge level.

209 **Good knowledge:** If the study participants answer the knowledge questions above or equal to the  
210 computed median were considered as having good knowledge.

211 **Poor knowledge:** If the study participants answer, the knowledge questions below the computed  
212 median were considered as having poor knowledge.

213 **Practice:** Activities acting by nurses to prevent hypothermia. Items in this category of the Likert  
214 scale were intended to determine the frequency of performing certain interventions to prevent  
215 hypothermia and to increase patient comfort. The response categories were coded as 0 to 2 for:  
216 never, sometimes, and always.

217 **Good practice:** The study participants who answer above or equal to the computed median of  
218 practice questions were considered as having good practice.

219 **Poor practice:** The study participants who answer below the computed median of practice  
220 questions were considered as having poor practice.

221 **Job satisfaction:** is a positive or pleasurable emotional state resulting from the appraisal of one's  
222 job or job experience. Job satisfaction of nurses was measured using the questionnaire adopted by  
223 the principal investigator with a 27-item scale. This instrument had 5-point Likert scales in which  
224 five denotes strongly Agree and one denotes strongly disagree. When the total score for the job  
225 satisfaction questionnaire was greater than or equal to the computed median, we said they were

226 satisfied, and less than the computed median, we said they were dissatisfied with the overall aspect  
227 of their work.

### 228 **Data collection instruments and procedure**

229 Data was collected by using a self-administered questionnaire which was adapted from guidelines  
230 of AORN and NICE perioperative hypothermia prevention, and other literature (which involves  
231 27 questions for knowledge and 14 questions for practice (20, 34, 47, 48), and 15 questions for  
232 Socio-demographic, institutional and other characteristics (2, 4, 20-22, 34, 39). The questioners  
233 were prepared in the English language based on the study objectives, focusing on the background  
234 information of hypothermia and its prevention. Five BSc nurse staff who were working other than  
235 the study ward were recruited for data collection and two MSc holder nurses were recruited as a  
236 supervisor. Overall, the data collection process was coordinate and supervise by the principal  
237 investigator.

### 238 **Data quality control**

239 To ensure the quality of data one-day training was given to data collectors and supervisors  
240 regarding the objective of the study and data collection process. Moreover, the questionnaire was  
241 pretested among 5% of the sample size (21 nurses) at Woldia Referral Hospital. Regular  
242 supervision was done to check the consistency and completeness of the filled-out questionnaires,  
243 by the supervisors and principal investigator. The reliability of the tool for each outcome variable  
244 and job satisfaction questionnaires were checked by using SPSS version 25, Cronbach's alpha  
245 reliability test. The tests were shows 0.81, 0.77, and 0.91 for knowledge, practice, and job  
246 satisfaction respectively, which is greater than the minimum standard (0.7). This shows that the  
247 tool was reliable in terms of internal consistency. To adhere to confidentiality, the names in the  
248 questionnaires were replaced by codes, and the participants were informed about these so that they  
249 had a record of their codes to facilitate tracking of the completeness of their respective  
250 questionnaires. The supervisors and the principal investigator were responsible for checking on  
251 the completeness of the data on-site. Incomplete questionnaires were put in offices arranged for  
252 this purpose so that participants completed their questionnaires. Furthermore, the supervisors and  
253 principal investigators throughout the data collection period did intensive supervision.

## 254 **Data processing and analysis**

255 After the data was checked for its consistency and completeness, data were entered into Epi Info  
256 version 7 and exported into SPSS version 25 for analysis. Descriptive analysis was done for each  
257 variable in the study by running frequencies, percentages, and median with IQR. Tables were used  
258 for presenting results to give a clear picture of the magnitude and relationships of various study  
259 variables. Binary logistic regression was used to determine the significant association between the  
260 independent and dependent variables. Those independent variables, which are less than 0.2 in  
261 bivariate analysis, were entered into multivariable logistic regressions. Association between the  
262 independent variable and dependent variable was considered significant if P-value was less than  
263 0.05 from multivariate logistic regression analysis. Multicollinearity was checked by using the  
264 variance inflation factor and its values were between 1 and 10. Model adequacy was checked by  
265 using Hosmer and Lemeshow so the model indicates a good fit which indicates .856 and .993 for  
266 knowledge and practice respectively.

## 267 **Patient and public involvement**

268 The questionnaires used for this study were developed or adapted from different literature and  
269 guidelines. The study focused on nurses' knowledge, practice, and determinant factors regarding  
270 perioperative hypothermia prevention at Northwest Amhara regional state referral hospitals.  
271 Because nurses are primarily responsible body to prevent the occurrence of hypothermia in  
272 surgical patients. So that nurses were actively involved, no patients or member of the public were  
273 involved in the design or planning of this research study. The result of the study will disseminate  
274 to hospital managers, regional health bureau, policymakers, and researchers in preparing plans,  
275 adopting practical guidelines, budget allocation for fulfilling materials and training, design proper  
276 strategies, and serve as baseline information's.

## 277 **Results**

### 278 **Socio-demographic characteristics of the respondents**

279 A total of 423, with a response rate of 97.6% of study participants were involved in this study. The  
280 median age (IQR) of the study participants was 29 (27, 32) years, ranging from 20-58 years and  
281 almost half of the participants were under the age category between 26 to 30 years. Two hundred

thirteen (51.6%) of the participants were male, and 235(56.9%) were married. Out of 413 nurses, three-fourth of the respondents had a bachelor's degree, and one hundred eighty-one (43.8%) of the respondents had 6-10 years of work experience. One hundred seventy-two (41.6%) of participants' monthly salary were range from 7001-9000 and the median salary of the respondents was 7071 with an interquartile range of (5644, 8017) Ethiopian birr (Table1).

Table 1: Sociodemographic characteristics of the study participants on hypothermia prevention among perioperative patients in Amhara Regional State Referral Hospitals, Northwest Ethiopia, 2021(N=413).

| Variable           | Response   | Frequency (N=413) | Percentage (%) |
|--------------------|------------|-------------------|----------------|
| Sex                | Male       | 213               | 51.6           |
|                    | Female     | 200               | 48.4           |
| Age                | ≤ 25 years | 53                | 12.8           |
|                    | 26-30      | 224               | 54.2           |
|                    | 31-35      | 86                | 20.8           |
|                    | ≥ 35       | 50                | 12.1           |
| Marital status     | Single     | 163               | 39.5           |
|                    | Married    | 235               | 56.9           |
|                    | Divorced   | 12                | 2.9            |
|                    | Widowed    | 3                 | .7             |
| Educational status | Diploma    | 59                | 14.3           |
|                    | Degree     | 311               | 75.3           |
|                    | Master     | 43                | 10.4           |
| Work experience    | ≤ 5 years  | 157               | 38             |
|                    | 6-10       | 181               | 43.8           |

| Variable            | Response  | Frequency (N=413) | Percentage (%) |
|---------------------|-----------|-------------------|----------------|
|                     | 11-15     | 57                | 13.8           |
|                     | ≥ 16      | 18                | 4.4            |
| Monthly salary(ETB) | ≤ 5000    | 42                | 10.2           |
|                     | 5001-7000 | 158               | 38.3           |
|                     | 7001-9000 | 172               | 41.6           |
|                     | ≥ 9001    | 41                | 9.9            |

290 *ETB- Ethiopian Birr*

### 291 **Institutional and job-related factors of the respondents**

292 From 413, 268(64.9%) of nurses did not take training about perioperative hypothermia prevention.  
 293 half of the respondents reports that they were reading or reviewing updated evidence, and only  
 294 121(29.3%) of participants have notified the presence of guidelines or protocols in their working  
 295 area. Out of the study participants, 268 (64.9%) and 342 (82.8%) were having a shortage of  
 296 thermometers and warming materials respectively. From 413 study participants near half of 217  
 297 (52.5%) participants were satisfied with their jobs (Table 2).

298 Table 2: Institutional and other related factors of the respondents on perioperative hypothermia  
 299 prevention in Amhara Regional State Referral Hospitals, Northwest Ethiopia, 2021. (N=413).

| Variable                 | Response | Frequency (N=413) | Percentage (%) |
|--------------------------|----------|-------------------|----------------|
| Working place (hospital) | TGSRH    | 84                | 20.3           |
|                          | UoGCSRH  | 83                | 20.1           |
|                          | DMCRH    | 73                | 17.7           |
|                          | DTCRH    | 47                | 11.4           |
|                          | FHRH     | 126               | 30.5           |

| Variable                                           | Response         | Frequency (N=413) | Percentage (%) |
|----------------------------------------------------|------------------|-------------------|----------------|
| Ward:                                              | Emergency        | 103               | 24.9           |
|                                                    | Recovery         | 39                | 9.4            |
|                                                    | OR               | 102               | 24.7           |
|                                                    | ICU              | 53                | 12.8           |
|                                                    | Orthopedics ward | 46                | 11.1           |
|                                                    | Surgical ward    | 70                | 16.9           |
| Daily working hours                                | ≤ 8 hrs          | 354               | 85.7           |
|                                                    | ≥9 hrs           | 59                | 14.3           |
| Training on hypothermia prevention                 | Yes              | 145               | 35.1           |
|                                                    | No               | 268               | 64.9           |
| Presence of protocol/guideline                     | Yes              | 121               | 29.3           |
|                                                    | No               | 292               | 70.7           |
| Reading updated evidence on hypothermia prevention | Yes              | 206               | 49.9           |
|                                                    | No               | 207               | 50.1           |
| Availability of thermometer                        | Yes              | 145               | 35.1           |
|                                                    | No               | 268               | 64.9           |
| Constraints of warming material                    | Yes              | 342               | 82.8           |
|                                                    | No               | 71                | 17.2           |
| Shortage of blanket                                | Yes              | 166               | 40.2           |
|                                                    | No               | 247               | 59.8           |
| Shortage of linens                                 | Yes              | 89                | 21.5           |
|                                                    | No               | 324               | 78.5           |



| Variable                      | Response     | Frequency (N=413) | Percentage (%) |
|-------------------------------|--------------|-------------------|----------------|
| Shortage of fluid warmer      | Yes          | 132               | 32.0           |
|                               | No           | 281               | 68.0           |
| Shortage of air warmer/heater | Yes          | 212               | 51.3           |
|                               | No           | 201               | 48.7           |
| Shortage of warmer blanket    | Yes          | 217               | 52.5           |
|                               | No           | 196               | 47.5           |
| Job satisfaction              | Satisfied    | 217               | 52.5           |
|                               | Dissatisfied | 196               | 47.5           |

### 300 Knowledge of nurses on hypothermia prevention

301 The overall median knowledge score of the study participants on perioperative hypothermia  
 302 prevention was 18 with an IQR of (16, 21). In this study, 244 (59.1%) with 95% CI: (54.7, 63.7)  
 303 of the participants had good knowledge while the rest were not knowledgeable. Among a total of  
 304 knowledge assessment questions, 359(86.9%) and 288(69.7%) of participants have correctly  
 305 answered the statement of the internal environment of humans can be maintained by  
 306 thermoregulation, and perioperative hypothermia is characterized as a core body temperature of <  
 307 36 ° C respectively. Three-fourth of the participants gave the correct answer of anesthetic drugs  
 308 increase heat loss while 250(60.5) of the participants correctly answered the complications of  
 309 hypothermia in surgical patients. Only 83(20.1%) of the participants were correctly respond in the  
 310 theatre room, the patient's temperature should be measured every 30 minutes while in the recovery  
 311 room, every 15 minutes (Table 3).

312

313

314

315

316

317 Table 3. Nurse's responses on knowledge of perioperative hypothermia prevention (N=413)

| Statements about perioperative hypothermia prevention                                                                                                                                      | True/<br>False | Correct<br>answer |      | Wrong answer<br>/I don't know |      |
|--------------------------------------------------------------------------------------------------------------------------------------------------------------------------------------------|----------------|-------------------|------|-------------------------------|------|
|                                                                                                                                                                                            |                | N                 | %    | N                             | %    |
| The internal environment of humans can be maintained by thermoregulation.                                                                                                                  | T*             | 359               | 86.9 | 54                            | 13.1 |
| PH at any time during the perioperative cycle is characterized as a core body temperature < 36 ° C.                                                                                        | T*             | 288               | 69.7 | 125                           | 30.3 |
| Anesthetic drugs decrease heat loss in surgical patients.                                                                                                                                  | F**            | 311               | 75.3 | 102                           | 24.7 |
| Cold IV fluids and blood products increase heat loss.                                                                                                                                      | T*             | 288               | 69.5 | 126                           | 30.5 |
| PH is not associated with complications such as changes in drug metabolism, healing complications, shivering, clotting defects, cardiac morbidity, and prolonged post-anesthetic recovery. | F**            | 250               | 60.5 | 163                           | 39.5 |
| To minimize post-operative complications, nurses should advise patients to bring along additional clothing to help them stay warm before surgery                                           | T*             | 339               | 82.1 | 74                            | 17.9 |
| The pulmonary artery catheter, distal esophagus, urinary bladder, rectum, zero heat-flux are some of the sites for temperature measurements.                                               | T*             | 174               | 42.1 | 239                           | 57.9 |
| Nurses should be well trained and knowledgeable about the use of both temperature recording and warming devices                                                                            | T*             | 346               | 83.8 | 67                            | 16.2 |
| Forced-air warming devices, warm water circulating and conductive devices are not some of the devices for warming surgical patients                                                        | F**            | 241               | 58.4 | 172                           | 41.6 |
| The method for temperature monitoring should not be chosen based on the criteria for a procedure                                                                                           | F**            | 281               | 68   | 132                           | 32   |
| To ensure accurate information, the team takes the patient's temperature at 15-minute intervals using different measuring devices at different sites.                                      | F**            | 138               | 33.4 | 275                           | 66.6 |
| Patients with temperature < 36.0°C undergoing anesthesia & those having a high risk of cardiovascular complications are at higher risk for IPH                                             | T*             | 293               | 70.9 | 120                           | 29.1 |
| It is not necessary to measure patients' temperature in the hour before departing the ward since it will be measured at the theatre.                                                       | F**            | 279               | 67.6 | 134                           | 32.4 |

|                                                                                                                                                                                                                                                                                                                   |                                                                                                                                                                                                                                                                                                                                                                                                                                                                                                                                                                                                                                                                                                                                                                                                                                                                                                                                                                                                                                                                                                                                                                                                                                                                                                                                                                                                                                                                                                                                                                                                                                                                                                                                                                                                                                                                                                                                                   |                                                                                                                                               |                                                                                                                                                          |                                                                                                                                                                     |                                                                                                                                                      |                                                                                                                                                                     |
|-------------------------------------------------------------------------------------------------------------------------------------------------------------------------------------------------------------------------------------------------------------------------------------------------------------------|---------------------------------------------------------------------------------------------------------------------------------------------------------------------------------------------------------------------------------------------------------------------------------------------------------------------------------------------------------------------------------------------------------------------------------------------------------------------------------------------------------------------------------------------------------------------------------------------------------------------------------------------------------------------------------------------------------------------------------------------------------------------------------------------------------------------------------------------------------------------------------------------------------------------------------------------------------------------------------------------------------------------------------------------------------------------------------------------------------------------------------------------------------------------------------------------------------------------------------------------------------------------------------------------------------------------------------------------------------------------------------------------------------------------------------------------------------------------------------------------------------------------------------------------------------------------------------------------------------------------------------------------------------------------------------------------------------------------------------------------------------------------------------------------------------------------------------------------------------------------------------------------------------------------------------------------------|-----------------------------------------------------------------------------------------------------------------------------------------------|----------------------------------------------------------------------------------------------------------------------------------------------------------|---------------------------------------------------------------------------------------------------------------------------------------------------------------------|------------------------------------------------------------------------------------------------------------------------------------------------------|---------------------------------------------------------------------------------------------------------------------------------------------------------------------|
| 1<br>2<br>3<br>4<br>5<br>6<br>7<br>8<br>9<br>10<br>11<br>12<br>13<br>14<br>15<br>16<br>17<br>18<br>19<br>20<br>21<br>22<br>23<br>24<br>25<br>26<br>27<br>28<br>29<br>30<br>31<br>32<br>33<br>34<br>35<br>36<br>37<br>38<br>39<br>40<br>41<br>42<br>43<br>44<br>45<br>46<br>47<br>48<br>49<br>50<br>51<br>52<br>53 | <p>Except in urgent circumstances, preoperative patients with temperatures of &lt; 36.0°C should be warmed for 30 minutes by using active warming method</p> <p>Special attention should be given to the comfort of surgical patients having difficulties expressing themselves</p> <p>The method for warming patients should be chosen based on planned procedure, patient position, IV access site, and warming equipment constraints.</p> <p>Critical incidence reporting is not necessary for patients coming into the theatre with a temperature of less than 36.0°C.</p> <p>Induction of anesthesia should not begin unless the patient's temperature is 36.0°C or above.</p> <p>The theatre's room temperature should be at least 21°C which can be adjusted to allow better working once active warming is initiated.</p> <p>All irrigation fluids used intraoperative should be warmed in a thermostatically controlled cabinet to a temperature of 38- 40°C.</p> <p>Fluid warming devices should be used to warm IV fluids (500mls or more) &amp; blood products to 37°C</p> <p>Regardless of the temperatures of patients before leaving the ward, they should be warmed using active warming method once in the theatre</p> <p>The surgical patient should be well covered throughout surgery to conserve heat and only be exposed during surgical preparation.</p> <p>During the post-operative period, hypothermic patients should be warmed using AWM until they become warm before transferring them to the ward.</p> <p>Patients should be provided with at least 1 cotton sheet, 2 blankets, or a duvet during the postoperative phase</p> <p>Whiles in the OR, the patients' temperature should be measured every 15 minutes and every 30 minutes while in the RR.</p> <p>The temperature of post-operative patients should be recorded on arrival in the ward and be documented as part of a routine 4 hrs. observations.</p> | <p>T*</p> <p>T*</p> <p>T*</p> <p>F**</p> <p>T*</p> <p>T*</p> <p>T*</p> <p>T*</p> <p>T*</p> <p>T*</p> <p>T*</p> <p>T*</p> <p>F**</p> <p>T*</p> | <p>284</p> <p>335</p> <p>333</p> <p>259</p> <p>203</p> <p>273</p> <p>214</p> <p>260</p> <p>256</p> <p>310</p> <p>348</p> <p>319</p> <p>83</p> <p>337</p> | <p>68.8</p> <p>81.1</p> <p>80.6</p> <p>62.7</p> <p>49.2</p> <p>66.1</p> <p>51.8</p> <p>63</p> <p>62</p> <p>75.1</p> <p>84.3</p> <p>77.2</p> <p>20.1</p> <p>81.6</p> | <p>129</p> <p>78</p> <p>80</p> <p>154</p> <p>210</p> <p>140</p> <p>199</p> <p>153</p> <p>157</p> <p>103</p> <p>65</p> <p>94</p> <p>330</p> <p>76</p> | <p>31.2</p> <p>18.9</p> <p>19.4</p> <p>37.3</p> <p>50.8</p> <p>33.9</p> <p>48.2</p> <p>37</p> <p>38</p> <p>24.9</p> <p>15.7</p> <p>22.8</p> <p>79.9</p> <p>18.4</p> |
|-------------------------------------------------------------------------------------------------------------------------------------------------------------------------------------------------------------------------------------------------------------------------------------------------------------------|---------------------------------------------------------------------------------------------------------------------------------------------------------------------------------------------------------------------------------------------------------------------------------------------------------------------------------------------------------------------------------------------------------------------------------------------------------------------------------------------------------------------------------------------------------------------------------------------------------------------------------------------------------------------------------------------------------------------------------------------------------------------------------------------------------------------------------------------------------------------------------------------------------------------------------------------------------------------------------------------------------------------------------------------------------------------------------------------------------------------------------------------------------------------------------------------------------------------------------------------------------------------------------------------------------------------------------------------------------------------------------------------------------------------------------------------------------------------------------------------------------------------------------------------------------------------------------------------------------------------------------------------------------------------------------------------------------------------------------------------------------------------------------------------------------------------------------------------------------------------------------------------------------------------------------------------------|-----------------------------------------------------------------------------------------------------------------------------------------------|----------------------------------------------------------------------------------------------------------------------------------------------------------|---------------------------------------------------------------------------------------------------------------------------------------------------------------------|------------------------------------------------------------------------------------------------------------------------------------------------------|---------------------------------------------------------------------------------------------------------------------------------------------------------------------|

318 T\*-True statement, F\*\*- False statement, N- Number of participants.

### 319 Practice of nurses on hypothermia prevention

320 The overall median practice score of the study participants on perioperative hypothermia  
 321 prevention was 18 with an IQR of (14, 21). In this study, 208 (50.4%) with 95% CI: (45.5, 55) of  
 322 the participants had a good practice. Among practice assessment questions, 258(62.5%) of the  
 323 respondents they measure temperature as soon as patient arrival and 224(54.2 %) of the  
 324 respondents were always assessing the sign and symptoms of hypothermia. Nearly half of the  
 325 respondents 217(52.1%), 214(51.8%), and 213(51.6%) were sometimes developed and  
 326 implemented care plans on perioperative hypothermia prevention, maintaining ambient room  
 327 temperature according to guidelines, and also applying warm intravenous, blood products, and  
 328 irrigation fluids respectively. Among 413 participants, 185(44.8%) of the respondents were  
 329 reported never using forced-air warming devices, warm water circulating devices, and conductive  
 330 devices for warming surgical patients (Table 4).

331 Table 4. Nurse's responses on the practice of perioperative hypothermia prevention in Northwest  
 332 Amhara Regional State Referral Hospitals, Northwest, Ethiopia (N=413)

| Hypothermia prevention practices                                                                                       | Never |      | Some times |      | Always |      |
|------------------------------------------------------------------------------------------------------------------------|-------|------|------------|------|--------|------|
|                                                                                                                        | N     | %    | N          | %    | N      | %    |
| Do you measure temperature as soon as patient arrival?                                                                 | 21    | 5.1  | 134        | 32.4 | 258    | 62.5 |
| Do you measure temperature regularly according to guidelines?                                                          | 50    | 12.1 | 202        | 48.9 | 161    | 39   |
| Do you warm intravenous, blood products, and irrigation fluids using warming devices before administering to patients? | 112   | 27.1 | 213        | 51.6 | 88     | 21.3 |
| Do you cover the mattress plastic sheet with dry linen before patient admission?                                       | 59    | 14.3 | 200        | 48.4 | 154    | 37.3 |

| Hypothermia prevention practices                                                                                                | Never |      | Some times |      | Always |      |
|---------------------------------------------------------------------------------------------------------------------------------|-------|------|------------|------|--------|------|
|                                                                                                                                 | N     | %    | N          | %    | N      | %    |
| Do you use forced-air warming devices, warm water circulating devices, and conductive devices for warming patients?             | 185   | 44.8 | 170        | 41.2 | 58     | 14   |
| Do you communicate your assessment findings on factors that could lead to hypothermia to all members of the perioperative team? | 57    | 13.8 | 160        | 38.7 | 196    | 47.5 |
| Do you advise patients to inform you when they feel cold during their hospitalization?                                          | 53    | 12.8 | 195        | 47.2 | 165    | 40   |
| Do you develop and implement care plans for perioperative hypothermia prevention?                                               | 73    | 17.7 | 217        | 52.5 | 123    | 29.8 |
| Do you document the site for temperature measurement in the patients' file?                                                     | 63    | 15.3 | 156        | 37.8 | 194    | 47   |
| Do you maintain ambient room temperature according to the guideline?                                                            | 110   | 26.6 | 214        | 51.8 | 89     | 21.5 |
| Do you assess patients for their risk for perioperative hypothermia?                                                            | 41    | 9.9  | 202        | 48.9 | 170    | 41.2 |
| Do you assess for signs and symptoms of hypothermia?                                                                            | 30    | 7.3  | 159        | 38.5 | 224    | 54.2 |
| Do you advise patients to stay warm prior to surgery?                                                                           | 48    | 11.6 | 185        | 44.8 | 180    | 43.6 |

| Hypothermia prevention practices                                                                                    | Never |     | Some times |    | Always |      |
|---------------------------------------------------------------------------------------------------------------------|-------|-----|------------|----|--------|------|
|                                                                                                                     | N     | %   | N          | %  | N      | %    |
| Do you include thermoregulation interventions and patient-related care to thermoregulation in your hand-over report | 41    | 9.9 | 194        | 47 | 178    | 43.1 |

### 333 Factors associated with the level of knowledge on hypothermia prevention

334 In the binary logistic regression, ten from fifteen variables were found to have a significant  
 335 association with participants' level of knowledge on hypothermia at a p-value of < 0.2. However,  
 336 after controlling for the effects of potentially confounding variables using multivariate logistic  
 337 regression only sex, educational status, and training were found to be significant predictors for  
 338 knowledge on hypothermia prevention.

339 In this study, being male had 1.61 times more knowledge [AOR = 1.61,95% CI (1.02-2.53)]. Study  
 340 participants who had an educational level of degree and masters were 2.5 and 4.39 times more  
 341 likely to have good knowledge [AOR = 2.50; 95% CI (1.25-5.00), 4.39; (1.45-13.20)] respectively.  
 342 In this study also nurses who took training on perioperative hypothermia prevention had 3.68 times  
 343 more knowledge [AOR = 3.68; 95% CI (2.14-6.33)] (Table 5).

344 Table 5- Bi-variable and multivariable analysis of factors associated with knowledge of nurses on  
 345 perioperative hypothermia prevention in Amhara Region Referral Hospitals, Northwest Ethiopia.

| Variable           | Knowledge of nurses |      | COR (95%CI)     | P-value | AOR (95% CI)    | P-value |
|--------------------|---------------------|------|-----------------|---------|-----------------|---------|
|                    | Good                | Poor |                 |         |                 |         |
| Sex                |                     |      |                 |         |                 |         |
| Female             | 105                 | 95   | 1               |         | 1               |         |
| Male               | 139                 | 74   | 1.69(1.14-2.52) | .009    | 1.61(1.02-2.53) | .038**  |
| Educational status |                     |      |                 |         |                 |         |
| Diploma            | 19                  | 40   | 1               |         | 1               |         |

1  
2  
3  
4  
5  
6  
7  
8  
9  
10  
11  
12  
13  
14  
15  
16  
17  
18  
19  
20  
21  
22  
23  
24  
25  
26  
27  
28  
29  
30  
31  
32  
33  
34  
35  
36  
37  
38  
39  
40  
41  
42  
43  
44  
45  
46  
47  
48  
49  
50  
51  
52  
53  
54  
55  
56  
57  
58  
59  
60

|                     |     |     |                 |      |                  |        |
|---------------------|-----|-----|-----------------|------|------------------|--------|
| Degree              | 191 | 120 | 3.35(1.85-6.05) | .000 | 2.50(1.25-5.00)  | .010** |
| Master              | 34  | 9   | 7.95(3.18-19.8) | .000 | 4.39(1.45-13.2)  | .008** |
| Hospital            |     |     |                 |      |                  |        |
| FHRH                | 67  | 59  | 1               |      | 1                |        |
| UoGCSRH             | 48  | 35  | 1.20(.69-2.11)  | .314 | 1.18(.631-2.21)  | .601   |
| DMCRH               | 51  | 22  | 2.04(1.11-3.76) | .056 | 1.74(.863-3.49)  | .118   |
| DTCRH               | 33  | 14  | 2.08(1.01-4.25) | .046 | 2.16(.933-4.94)  | .068   |
| TGSRH               | 45  | 39  | 1.01(.58-1.77)  | .955 | 1.20(.627-2.29)  | .581   |
| Ward                |     |     |                 |      |                  |        |
| Emergency           | 52  | 51  | 1               |      | 1                |        |
| Recovery            | 31  | 8   | 3.8(1.59-9.05)  | .003 | 2.24(.862-5.84)  | .098   |
| ICU                 | 34  | 19  | 1.75(.88-3.46)  | .106 | 1.48(.696-3.16)  | .307   |
| OR                  | 67  | 35  | 1.87(1.07-3.29) | .028 | 1.51(.799-2.86)  | .203   |
| Orthopedics         | 26  | 20  | 1.27(.63-2.56)  | .496 | 1.35(.641-3.02)  | .402   |
| Surgical            | 34  | 36  | .92(.50-1.70)   | .805 | .850(.431-1.67)  | .640   |
| Monthly salary(ETB) |     |     |                 |      |                  |        |
| ≤ 5000              | 18  | 21  | 1               |      | 1                |        |
| 5001-7000           | 90  | 74  | 1.41(.7-2.85)   | .477 | 1.10 (.478-2.35) | .885   |
| 7001-9000           | 107 | 64  | 1.95(.96-3.93)  | .075 | .848(.492-2.49)  | .802   |
| ≥ 9001              | 29  | 10  | 3.38(1.3-8.79)  | .010 | 1.53(.507-4.67)  | .447   |
| Having guideline    |     |     |                 |      |                  |        |
| No                  | 124 | 168 | 1               |      | 1                |        |
| Yes                 | 75  | 46  | 1.37(.88-2.1)   | .153 | .848(.490-1.46)  | .555   |
| Took Training       |     |     |                 |      |                  |        |

|                          |     |     |                 |      |                 |        |
|--------------------------|-----|-----|-----------------|------|-----------------|--------|
| No                       | 128 | 140 | 1               |      | 1               |        |
| Yes                      | 116 | 29  | 4.37(2.72-7.01) | .000 | 3.68(2.14-6.33) | .000** |
| Reading updated evidence |     |     |                 |      |                 |        |
| No                       | 106 | 100 | 1               |      | 1               |        |
| Yes                      | 138 | 69  | 1.88(1.26-2.80) | .002 | 1.32(.834-2.10) | .234   |
| Shortage of thermometer  |     |     |                 |      |                 |        |
| Yes                      | 148 | 120 | 1               |      | 1               |        |
| No                       | 96  | 49  | 1.58(1.04-2.41) | .031 | 1.27(.776-2.08) | .325   |
| Job satisfaction         |     |     |                 |      |                 |        |
| Unsatisfied              | 100 | 95  | 1               |      | 1               |        |
| Satisfied                | 144 | 74  | 1.84(1.24-2.74) | .002 | 1.38(.873-2.20) | .166   |

Variables which show significant association during multivariable logistic regression at \*\*p-value <0.05, Hosmer and Lemeshow test P=.856, 1=Reference.

### Factors associated with the level of practice on hypothermia prevention

In bivariate logistic regression analysis, eleven from sixteen variables were found to have significant predictors at a p-value < 0.2. But after controlling for the effects of potentially confounding variables using multivariate logistic regression only nurses working ward, took training, job satisfaction, and knowledge of nurses were found to be significant predictors for the practice of nurses on hypothermia prevention at (P<0.05).

Nurses who were working in recovery and intensive care units were 2.87 and 2.39 times more likely to have good practice [AOR = 2.87; 95% CI (1.08-7.58), and 2.39; 95% CI (1.09-5.22)] respectively. Nurses who took training in hypothermia prevention were 2.64 times more likely to have good practices for hypothermia prevention [AOR = 2.64; 95% CI (1.53-4.57)]. In this study, also nurses who are satisfied with their job were 2.15 times higher to have a good level of practice [AOR 2.15; 95% CI (1.34-3.43)]. The other significant variable is nurses who had knowledge of



1  
2  
3 360 hypothermia were 2.64 times higher to have a good level of practice [AOR 2.64; 95% CI (1.63-  
4 361 4.27)] (Table 6)

5  
6  
7 362 Table 6- Bi-variable and multivariable analysis of factors associated with the practice of nurses on  
8 363 perioperative hypothermia prevention in Amhara Region Referral Hospitals, Northwest Ethiopia.

9  
10 364  
11  
12 365  
13  
14  
15  
16  
17  
18  
19  
20  
21  
22  
23  
24  
25  
26  
27  
28  
29  
30  
31  
32  
33  
34  
35  
36  
37  
38  
39  
40  
41  
42  
43  
44  
45  
46  
47  
48  
49  
50  
51  
52  
53  
54  
55  
56  
57  
58  
59  
60

For peer review only

| Variable           | Practice of nurses |      | COR (95%CI)     | P-value | AOR (95% CI)    | P-value |
|--------------------|--------------------|------|-----------------|---------|-----------------|---------|
|                    | Good               | Poor |                 |         |                 |         |
| Educational status |                    |      |                 |         |                 |         |
| Diploma            | 16                 | 43   | 1               |         | 1               |         |
| Degree             | 159                | 152  | 2.81(1.51-5.20) | .000    | 1.94(.902-4.20) | .089    |
| Master             | 24                 | 19   | 3.39(1.47-7.79) | .002    | 1.28(.411-4.00) | .669    |
| Working ward       |                    |      |                 |         |                 |         |
| Emergency          | 41                 | 62   | 1               |         | 1               |         |
| Recovery           | 30                 | 9    | 5.04(2.1-11.71) | .000    | 2.87(1.08-7.58) | .033**  |
| ICU                | 34                 | 19   | 2.70(1.36-5.37) | .004    | 2.39(1.09-5.22) | .029**  |
| OR                 | 59                 | 43   | 2.07(1.18-3.62) | .010    | 1.63(.856-3.12) | .136    |
| Orthopedics        | 20                 | 26   | 1.16(.575-2.35) | .674    | 1.17(.527-2.62) | .693    |
| Surgical           | 24                 | 46   | .78(.419-1.48)  | .467    | .657(.321-1.34) | .250    |
| Work experience    |                    |      |                 |         |                 |         |
| ≤ 5 years          | 69                 | 88   | 1               |         | 1               |         |
| 6-10               | 95                 | 86   | 1.4(.917-2.16)  | .118    | 1.26(.713-2.23) | .424    |
| 11-15              | 32                 | 25   | 1.63(.886-3.00) | .116    | 1.68(.735-3.86) | .217    |
| ≥ 16               | 12                 | 6    | 2.55(.911-7.14) | .075    | 3.26(.85-12.44) | .083    |

1  
2  
3  
4  
5  
6  
7  
8  
9  
10  
11  
12  
13  
14  
15  
16  
17  
18  
19  
20  
21  
22  
23  
24  
25  
26  
27  
28  
29  
30  
31  
32  
33  
34  
35  
36  
37  
38  
39  
40  
41  
42  
43  
44  
45  
46  
47  
48  
49  
50  
51  
52  
53  
54  
55  
56  
57  
58  
59  
60

---

|                              |     |     |                 |      |  |                 |        |
|------------------------------|-----|-----|-----------------|------|--|-----------------|--------|
| Monthly salary(ETB)          |     |     |                 |      |  |                 |        |
| ≤ 5000                       | 17  | 25  | 1               |      |  | 1               |        |
| 5001-7000                    | 67  | 91  | 1.08(.542-2.16) | .822 |  | 1.01(.436-2.35) | .976   |
| 7001-9000                    | 98  | 74  | 1.94(.987-3.86) | .057 |  | 1.26(.517-3.10) | .604   |
| ≥ 9001                       | 26  | 15  | 2.54(1.05-6.17) | .038 |  | 1.05(.310-3.58) | .933   |
| Having guideline/ protocol   |     |     |                 |      |  |                 |        |
| No                           | 131 | 161 | 1               |      |  | 1               |        |
| Yes                          | 77  | 44  | 2.15(1.39-3.32) | .001 |  | 1.42(.824-2.47) | .205   |
| Took training                |     |     |                 |      |  |                 |        |
| No                           | 104 | 164 | 1               |      |  | 1               |        |
| Yes                          | 104 | 41  | 4.00(2.58-6.19) | .000 |  | 2.64(1.53-4.57) | .001** |
| Reading updated evidence     |     |     |                 |      |  |                 |        |
| No                           | 84  | 122 | 1               |      |  | 1               |        |
| Yes                          | 124 | 83  | 2.17(1.46-3.21) | .000 |  | 1.37(.853-2.21) | .192   |
| Constraint of thermometer    |     |     |                 |      |  |                 |        |
| Yes                          | 123 | 145 | 1.67(1.11-2.51) | .014 |  | 1.10(.661-1.83) | .711   |
| No                           | 85  | 60  | 1               |      |  | 1               |        |
| Shortage of warming material |     |     |                 |      |  |                 |        |
| Yes                          | 166 | 176 | 1.53(.914-2.57) | .105 |  | 1.77(.923-3.39) | .086   |
| No                           | 42  | 29  | 1               |      |  | 1               |        |
| Job satisfaction             |     |     |                 |      |  |                 |        |
| Unsatisfied                  | 71  | 124 | 1               |      |  | 1               |        |
| Satisfied                    | 137 | 81  | 2.95(1.97-4.41) | .000 |  | 2.15(1.34-3.43) | .001** |
| Knowledge                    |     |     |                 |      |  |                 |        |

---

|      |     |     |                 |      |                 |        |
|------|-----|-----|-----------------|------|-----------------|--------|
| Good | 157 | 87  | 4.17(2.74-6.35) | .000 | 2.64(1.63-4.27) | .000** |
| Poor | 51  | 118 | 1               |      | 1               |        |

366 Variables which show significant association during multivariable logistic regression at\*\* p-value  
 367 <0.05, Hosmer and Lemeshow test P=.993, 1=Reference.

368

369

## 370 Discussion

371 The result of this study showed that the overall knowledge of nurses on perioperative hypothermia  
 372 prevention was 59.1% with 95% CI (54.7, 63.7). This finding is higher than previous studies  
 373 conducted at AaBET hospital in Addis Ababa, Ethiopia (52.1%) (30). The possible reason might be  
 374 due to sociodemographic differences, in the previous study most participants were having a degree  
 375 and diploma level of educational status and the study area was a single setting of trauma center  
 376 while in the current study greater than 10% of the participants had masters and study settings were  
 377 multicenter. The other reason might be due to the difference in the time of the study because of  
 378 the advancement of technology including updated evidence, educational programs were increased  
 379 when the time is more and more recent. So, the participants might have to get more information  
 380 regarding the topics. But this finding is much lower than those of studies conducted in Gambia  
 381 (82%) (20), Turkey (77.5%) (4), Brazil (81.5%) (24), University of Iowa Hospitals and Clinics,  
 382 America (71%) (25), Maryland, America (100%) (26), Ireland (28), and also as compared to NICE,  
 383 AORN, and ASPAN guidelines of perioperative hypothermia prevention (3, 11, 23). The possible  
 384 justification for this difference might be due to the level of staff training, adopted recommended  
 385 guidelines, socioeconomic status, and sample size. According to training on hypothermia  
 386 prevention in this study, only a few nurses (35.1%) have been trained while in the comparison  
 387 group except in Gambia, almost all participants were taking training on perioperative hypothermia  
 388 prevention. In terms of using guideline/protocol, the studies conducted in America participants  
 389 always used recommended guidelines and protocols while in this study only 29.3% of nurses were  
 390 report having guidelines/protocols. According to difference in socioeconomic status of the  
 391 participants as well as study setting, we Ethiopians are under a low-income country compared to  
 392 America, Brazil, Ireland. This indirectly affects the quality of healthcare education as well as

25

1  
2  
3 393 healthcare setting. In terms of sample size in the present study has a larger sample size (n=413) as  
4  
5 394 compare to all listed above (in Gambia (n=53), Turkey(n=200), Brazil(n=21), University of Iowa  
6  
7 395 Hospitals and Clinics, America n=30, Maryland, America n=19, Ireland n=198).

8  
9 396 In this study, the overall practice of nurses on perioperative hypothermia prevention was 50.4%  
10  
11 397 with 95% CI (45.5-55). This is consistent with the studies done in AaBET hospital Addis Abeba,  
12  
13 398 Ethiopia (52.5%)(30), and Durban, South Africa (46%)(35). But this study is higher than the study  
14  
15 399 done in Gambia (19%)(20). The possible reason might be the difference in socio-demographic  
16  
17 400 characteristics like most of the participants in the Gambia were have less than five years'  
18  
19 401 experience, and hadn't masters holder participants. On the other hand, the result of this study is  
20  
21 402 much lower when from NICE, AORN, and ASPAN recommendations guidelines (3, 11, 23). This  
22  
23 403 discrepancy could be due to the insufficient availability of warming material, measurement  
24  
25 404 material, and guidelines or protocol. Might be also an inadequate opportunity for frequent training  
26  
27 405 for nurses.

28 406 Regarding the determinants of the level of knowledge on hypothermia prevention, this study has  
29  
30 407 found out that male nurses were found to have more knowledge with hypothermia prevention by 1.6  
31  
32 408 times as compared to females. The reason might be females have an extra workload, most home  
33  
34 409 activities such as bearing and taking care of children, cooking, washing e.t.c, are mostly done by  
35  
36 410 females (49). So due to being overloaded by other additional home activities they might haven't  
37  
38 411 enough time to scale up their knowledge.

39 412 Nurses who had degrees and masters were more likely to have good knowledge with hypothermia  
40  
41 413 prevention by 2.5 and 4.4 times respectively as compared to those who had a diploma. This finding  
42  
43 414 is supported by studies conducted in Iran(21), and Brazil, educational interventions are  
44  
45 415 fundamental for nurses to guide their team and be the link of technical-scientific knowledge to  
46  
47 416 improve the quality of patient care (24). The possible reason might be that more educated  
48  
49 417 respondents have a higher opportunity of exposure to different courses directly or indirectly related  
50  
51 418 to the prevention of hypothermia.

52 419 Those nurses who received training related to hypothermia prevention were 3.7 and 2.6 times more  
53  
54 420 likely to have good knowledge and practice of hypothermia prevention as compared to  
55  
56 421 counterparts. This finding is supported by studies in Maryland, America(26), Brazil (36), Iran (21),

1  
2  
3 422 Turkey(4). The possible reason might be because training plays an important role in improving the  
4  
5 423 quality of patient care. The need to promote the effectiveness of in-site and off-site training of  
6  
7 424 nurses is an invaluable criterion. Training is necessary to update theoretical and practical  
8  
9 425 knowledge in every aspect of nursing education(49).

10  
11 426 Another finding is nurses who were working in recovery and intensive care units were 2.9 and 2.4  
12  
13 427 times more likely to have good practice respectively as compared to the nurses who were working  
14  
15 428 in the emergency ward. This finding is inconsistent with the study conducted in Turkey, ICU  
16  
17 429 nurses had more knowledge than nurses who were working in other wards but their practice was  
18  
19 430 not changing (4). The possible reason why Recovery and ICU nurses had better practice might be  
20  
21 431 patients admitted in Recovery and ICU wards need close follow-up because of their physiological  
22  
23 432 change/disturbance due to surgery or anesthesia effect. So working in two wards, the nurses  
24  
25 433 perform more activities, which maintain thermoregulation. Another reason might be nurse to  
26  
27 434 patient ratio is better than other wards, the standard is in recovery one to two, ICU one to one,  
28  
29 435 emergency one to three, and for surgical and orthopedics wards is one to six in Ethiopia. The other  
30  
31 436 reason might have better availability of resources like a thermometer, warming materials. And also  
32  
33 437 might be most nurses who were working in those two wards took more training than other nurses.

34  
35 438 In this study, also nurses who are satisfied with their job were 2.2 times more likely to have a good  
36  
37 439 level of practice as compared to those who were not satisfied. Job satisfaction of the nurses is  
38  
39 440 highly important in building up employee interest and efficiency, as higher job satisfaction  
40  
41 441 determines better employee performance(50). Therefore, hospital administrators need to work on  
42  
43 442 improving working environments, so that nurses become safe and comfortable to result in a  
44  
45 443 positive feeling towards their job.

46  
47 444 The other significant variable is nurses who had knowledge of hypothermia were 2.6 times more  
48  
49 445 likely to have a good practice as compared to those who hadn't knowledge of hypothermia  
50  
51 446 prevention. This study has supported studies conducted at the University of Calabar, Nigeria (37)  
52  
53 447 and Textbook of Brunner & Suddarth (38), AORN, surgical team awareness, education, and  
54  
55 448 understanding of the effects of hypothermia are necessary components to change how clinicians  
56  
57 449 provide quality, cost-effective patient care (51).

### 450 **Strength and Limitations of the study**

451 A self-reported questionnaire measure of knowledge and practice of nurses on the prevention of  
452 perioperative hypothermia is prone to social desirability bias and recall bias. Furthermore, this  
453 study was not triangulated with a qualitative method. Despite these limitations, this study clearly  
454 showed the knowledge, practice, and associated factors of nurses toward perioperative  
455 hypothermia prevention among nurses working at comprehensive referral hospitals for the first  
456 time in Ethiopia.

457

### 458 **Conclusion**

459 This study revealed that nurses' knowledge and practice regarding the prevention of perioperative  
460 hypothermia was found to be inadequate as compared to the recommended guidelines. Having  
461 higher educational status, being male, and attending training showed a positive and significant  
462 association with good knowledge of perioperative hypothermia prevention. Whereas, factors  
463 contributing to practice were working ward, training, job satisfaction, and knowledge of nurses.  
464 Based on the findings of the study, we recommend to Amhara regional health bureau and hospital  
465 administrators including ward coordinators in collaboration with other stakeholders: Improve  
466 sponsored educational opportunities especially those nurses who have a diploma, promote and  
467 strengthen in-service training periodically and regularly, better to motivate those who have the  
468 knowledge and practiced well, should fulfill the availability of resources like warming materials,  
469 thermometers, and updated guidelines/protocols, better to improve working environments so that  
470 nurses become safe and comfortable to result in a positive feeling towards their job. Researchers  
471 also should do other research for a strong recommendation by adding observational data collection  
472 methods.

### 473 **List of Abbreviation**

474 AOR: Adjusted Odd Ratio; AORN: Association of perioperative Register Nurses; ASPAN:  
475 American Society of PeriAnesthesia Nurses; CI: Confidence Interval; DMRH: Debre Markos  
476 Referral Hospital; DTCRH: Debre Tabor Comprehensive Referral Hospital; EMS: Emergency

1  
2  
3 477 Medical Service; EPI INFO: Statistical Package for Epidemiological Information Analysis;  
4  
5 478 FHRH: Felege Hiwot Referral Hospital; ICU: Intensive Care Unit; IPH: Inadvertent Perioperative  
6  
7 479 Hypothermia; OR: Odds Ratio; OR: Operation Room; HP: Perioperative Hypothermia; PI:  
8  
9 480 Principal Investigator; RR: Recovery Room; SPSS: Statistical Package of Social Science; T° c:  
10  
11 481 Temperature In Degree Centigrade; TGSRH: Tibebe Gion Specialized Referral Hospital; UK:  
12  
13 482 United Kingdom; UoGCSRH: University of Gondar Comprehensive Specialized Referral  
14  
15 483 Hospital; USA: United States of America  
16  
17  
18  
19

#### 20 484 **Declaration**

#### 21 485 **Ethical Approval and informed consent to participate**

22 486 The Institutional Ethical Review Board of the University of Gondar approved the study. Ethical  
23 487 clearance was obtained from the board on behalf of the School of Nursing (Ref.  
24 488 No. S/R/164/2/2021). Upon this clearance, additional written permission to conduct the study was  
25 489 obtained from the manager of all five referral hospitals when after explaining the purpose, the  
26 490 possible benefit of the study. Informed written consent was obtained from each respondent before  
27 491 fulfilling the questionnaire. It was explained for the respondents that participated in the study were  
28 492 voluntary and private information would be protected. The process no identify respondents by their  
29 493 name so; the process was done by keeping the privacy of the respondents.  
30  
31  
32  
33  
34  
35  
36

#### 37 494 **Consent to publish**

38 495 Not applicable  
39

#### 40 496 **Availability of data and materials:**

41 497 All the data were included in the study, and data will be available upon a responsible request from  
42 498 the corresponding author  
43  
44

#### 45 499 **Conflicts of Interest**

46 500 The authors declare that they have no conflicts of interest.  
47  
48

#### 49 501 **Funding**

50 502 No funder  
51  
52  
53

#### 54 503 **Authors' contributions**



1  
2  
3 504 Ashenafi Worku carried out the study starting from designing the study, analyzing, interpreting  
4 505 data, and reviewing the manuscript. Bezenaw Yimer Mekkonen, Netsanet Tsegaye, and  
5 506 Endalkachew Delle participated in proposal writing, data analysis, interpretation, and  
6 507 commenting drafts of the paper and manuscript. All authors involved in writing, review and  
7 508 approving the final draft of the manuscript. All authors read and approved the manuscript before  
8 509 submitted to the journal for publication.  
9  
10  
11  
12  
13

14 510

15 511

## 16 512 **Acknowledgment**

17  
18  
19  
20 513 We would like to thank the University of Gondar, College of Medicine and Health Sciences,  
21 514 School of Nursing, for making this thesis work by giving ethical clearance, and assigning advisors.  
22 515 We forward our appreciation to the five hospital administrators for allowing us to conduct this  
23 516 research and their cooperation. Finally, we would like to thank study participants for their  
24 517 volunteer participation, and data collectors and supervisors for their valuable support and  
25 518 cooperation during data collection.  
26  
27  
28  
29  
30  
31

## 32 519 **Reference**

- 33  
34 520 1. Osilla EV, Marsidi JL, Sharma S. Physiology, Temperature Regulation: StatPearls  
35 521 Publishing, Treasure Island (FL); 2020 2020.  
36  
37 522 2. Giuliano KK, Hendricks J. Inadvertent perioperative hypothermia: current nursing  
38 523 knowledge. AORN journal. 2017;105(5):453-63.  
39  
40 524 3. NICE. National Institute for Health and Care Excellence Guideline  
41 525 <https://pathways.nice.org.uk/pathways/inadvertent-perioperative-hypothermia>. . 2020.  
42  
43  
44  
45 526 4. Senol T, Yildiz T. Effects of a training programme on the awareness of inadvertent  
46 527 perioperative hypothermia among surgical nurses. Current Health Studies. 2019:27.  
47  
48 528 5. Torossian A, Bräuer A, Höcker J, Bein B, Wulf H, Horn E-P. Preventing inadvertent  
49 529 perioperative hypothermia. Deutsches Ärzteblatt International. 2015;112(10):166.  
50  
51 530 6. de Assunção Peixoto C, Ferreira MBG, dos Santos Felix MM, de Moraes Pereira CB,  
52 531 Cândido JV, Rocha VFR, et al. Factors contributing to intraoperative hypothermia in patients  
53  
54  
55  
56  
57  
58  
59  
60

- 1  
2  
3 532 undergoing elective surgery. *Perioperative Care and Operating Room Management*.  
4 533 2021;22:100150.
- 5  
6 534 7. Li Y, Liang H, Feng Y. Prevalence and multivariable factors associated with inadvertent  
7 535 intraoperative hypothermia in video-assisted thoracoscopic surgery: a single-center retrospective  
8 536 study. *BMC Anesthesiology*. 2020;20(1):25.
- 9  
10 537 8. Yi J, Lei Y, Xu S, Si Y, Li S, Xia Z, et al. Intraoperative hypothermia and its clinical  
11 538 outcomes in patients undergoing general anesthesia: National study in China. *PloS one*.  
12 539 2017;12(6):e0177221.
- 13  
14 540 9. Fekede MS, Sahile WA. Research Article Magnitude and associated factors of  
15 541 Perioperative hypothermia in patients who underwent Elective surgery at Tikur Anbessa  
16 542 Specialized Hospital, Addis Ababa, Ethiopia. 2019.
- 17  
18 543 10. Denu ZA, Semple P, Tawuye HY, Kassa AA. Perioperative Hypothermia and Predictors  
19 544 of Intra-Operative Hypothermia among Patients Operated at Gondar university Hospital from  
20 545 March to April 2015. 2015.
- 21  
22 546 11. Bashaw MA. Guideline Implementation: Preventing Hypothermia. *AORN Journal*.  
23 547 2016;103(3):304-13.
- 24  
25 548 12. Torossian A, Bräuer A, Höcker J, Bein B, Wulf H, Horn E-P. Preventing inadvertent  
26 549 perioperative hypothermia. *Deutsches Arzteblatt international*. 2015;112(10):166-72.
- 27  
28 550 13. Putnam K. Prevention of unplanned patient hypothermia. *AORN journal*.  
29 551 2015;102(4):P11-P2.
- 30  
31 552 14. Cohen S, Hayes JS, Tordella T, Puente I. Thermal efficiency of prewarmed cotton,  
32 553 reflective, and forced—warm-air inflatable blankets in trauma patients. *International Journal of*  
33 554 *Trauma Nursing*. 2002;8(1):4-8.
- 34  
35 555 15. Mooney B. Prevention of perioperative hypothermia.
- 36  
37 556 16. Geiger TM, Horst S, Muldoon R, Wise PE, Enrenfeld J, Poulouse B, et al. Perioperative  
38 557 core body temperatures effect on outcome after colorectal resections. *The American Surgeon*.  
39 558 2012;78(5):607-12.
- 40  
41 559 17. Burns SM, Wojnakowski M, Piotrowski K, Caraffa G. Unintentional hypothermia:  
42 560 implications for perianesthesia nurses. *Journal of PeriAnesthesia Nursing*. 2009;24(3):167-76.
- 43  
44 561 18. Wagner DV. Unplanned perioperative hypothermia. *Aorn j*. 2006;83(2):470, 3-6.

- 1  
2  
3 562 19. Billeter AT, Hohmann SF, Druen D, Cannon R, Polk Jr HC. Unintentional perioperative  
4 563 hypothermia is associated with severe complications and high mortality in elective operations.  
5 564 Surgery. 2014;156(5):1245-52.  
6  
7  
8 565 20. Jallow O. Nurses awareness and practice of perioperative hypothermia prevention 2020.  
9  
10 566 21. Pourrezaei S, Dinmohammadi M, Jafarirouhi A. The Effect of Thermal Care Workshop on  
11 567 EMS Staff Readiness in managing Accidental Hypothermia in Trauma Patients. Preventive Care  
12 568 in Nursing and Midwifery Journal. 2018;8(2):26-33.  
13  
14  
15 569 22. Evans J, Kenkre J. Current practice and knowledge of nurses regarding patient temperature  
16 570 measurement. Journal of medical engineering & technology. 2006;30(4):218-23.  
17  
18  
19 571 23. SELECTED WS. American Society of PeriAnesthesia Nurses Clinical guideline for the  
20 572 prevention of unplanned perioperative hypothermia [http://www.aspan.org/PDFfiles/HYPOTHERMIA\\_GUIDELINE10-02.pdf](http://www.aspan.org/PDFfiles/HYPOTHERMIA_GUIDELINE10-02.pdf) Centers for Disease Control and  
21 573 Prevention Guideline for prevention of surgical site infection, 1999 [http://www.cdc.gov/ncidod/dhqp/gl\\_surgicalsites.html](http://www.cdc.gov/ncidod/dhqp/gl_surgicalsites.html) Institute for Healthcare Improvement <http://www.ihc.org/IHI/Programs/CampaignSurgicalCareImprovementProject> <http://www.medqic.org/scip>.  
22 574 Last accessed on May. 2006;4.  
23 575  
24 576  
25 577  
26 578 24. de Souza A PS, Montezello D, . Knowledge of surgical center nursing professionals on  
27 579 hypothermia in surgical oncology patients. Rev Sobecc. 2017;22(4):188-92.  
28 580  
29 581 25. Block J, Lilienthal M, Cullen L, White A. Evidence-based thermoregulation for adult  
30 582 trauma patients. Critical care nursing quarterly. 2012;35(1):50-63.  
31 583  
32 584 26. Tamrakar P. Preventing Intraoperative and Postoperative Hypothermia. 2021.  
33 585  
34 586 27. Giuliano KK, Hendricks J. Inadvertent Perioperative Hypothermia: Current Nursing  
35 587 Knowledge. AORN journal. 2017;105(5):453-63.  
36 588  
37 589 28. Hegarty J, Walsh E, Burton A, Murphy S, O'gorman F, McPolin G. Nurses' knowledge of  
38 590 inadvertent hypothermia. Aorn Journal. 2009;89(4):701-13.  
39 591  
40 592 29. Ireland S MK, Ormrod P, Saliba E, Endacott R, Fitzgerald M, Cameron P. Nursing and  
41 593 medical staff knowledge regarding the monitoring and management of accidental or exposure  
42 594 hypothermia in adult major trauma patients,. International journal of nursing practice. 2006  
43 595 Dec;;12((6)):308-18.  
44 596  
45 597 30. TIGIST G. knowledge, practice and associated factors on hypothermia prevention of  
46 598 Nurses among <http://etd.aau.edu.et/handle/123456789/21258>. 2019.  
47 599  
48 600

- 1  
2  
3 593 31. Young VL, Watson ME. Prevention of perioperative hypothermia in plastic surgery.  
4 594 *Aesthetic Surgery Journal*. 2006;26(5):551-71.
- 5  
6 595 32. Saqe-Rockoff A, Schubert FD, Ciardiello A, Douglas E. Improving thermoregulation for  
7 596 trauma patients in the emergency department: An evidence-based practice project. *Journal of*  
8  
9 597 *Trauma Nursing*. 2018;25(1):14-20.
- 10  
11 598 33. Podsiadło P, Kosiński S, Darocha T, Zerebiec K, Wolak P, Kielczewski S, et al. Diagnosis  
12 599 and treatment of post-traumatic hypothermia in hospitals: a pilot study. *Polski Przegląd*  
13 600 *Chirurgiczny*. 2019;91(2).
- 14  
15 601 34. Ireland S, Murdoch K, Ormrod P, Saliba E, Endacott R, Fitzgerald M, et al. Nursing and  
16 602 medical staff knowledge regarding the monitoring and management of accidental or exposure  
17 603 hypothermia in adult major trauma patients. *International journal of nursing practice*.  
18 604 2006;12(6):308-18.
- 19  
20 605 35. Nel MJ, Hardcastle TC. Preventative measures taken against hypothermia in selected  
21 606 Durban hospitals' emergency centres and operating theatres. *African journal of emergency*  
22 607 *medicine : Revue africaine de la medecine d'urgence*. 2017;7(4):172-6.
- 23  
24 608 36. de Araujo Püschel VA. Knowledge of hypothermia in nursing professionals of surgical  
25 609 center. *Revista da Escola de Enfermagem da USP*. 2012;46(1):123-9.
- 26  
27 610 37. Oyira EJ, Ella R, Chukwudi UE, Paulina AI. Knowledge Practice and Outcome of Quality  
28 611 Nursing Care among Nurses in University of Calabar Teaching Hospital (UCTH). *Journal of*  
29 612 *Education and Training Studies*. 2016;4(11):179-93.
- 30  
31 613 38. Hinkle JL, Cheever KH. Brunner and Suddarth's textbook of medical-surgical nursing:  
32 614 Wolters kluwer india Pvt Ltd; 2018.
- 33  
34 615 39. Ayalew F, Kibwana S, Shawula S, Misganaw E, Abosse Z, Van Roosmalen J, et al.  
35 616 Understanding job satisfaction and motivation among nurses in public health facilities of Ethiopia:  
36 617 a cross-sectional study. *BMC nursing*. 2019;18(1):1-13.
- 37  
38 618 40. Burger L, Fitzpatrick J. Prevention of inadvertent perioperative hypothermia. *British*  
39 619 *Journal of Nursing*. 2009;18(18):1114-9.
- 40  
41 620 41. NICE. The management of inadvertent perioperative hypothermia in adults Vol. NICE  
42 621 clinical guideline 65. 2008.
- 43  
44 622 42. Bayleyegn B, Mehari A, Damtie D, Negash M. Knowledge, Attitude and Practice on  
45 623 Hospital-Acquired Infection Prevention and Associated Factors Among Healthcare Workers at

- 1  
2  
3 624 University of Gondar Comprehensive Specialized Hospital, Northwest Ethiopia. Infection and  
4 625 Drug Resistance. 2021;14:259.
- 6 626 43. Yalew ZM, Zeleke H, Afenigus AD, Yitayew YA, Minuye B, Kassahun SA. Patient  
8 627 Experience in Nursing Care and Associated Factors Among Adult Admitted Patients in Debre  
9 628 Markos and Dessie Referral Hospitals, Amhara Region, Ethiopia, 2019. Journal of Patient  
11 629 Experience. 2020:2374373520966817.
- 13 630 44. Engidaw MT, Gebremariam AD, Tiruneh SA, Asnakew DT, Abate BA. Chronic energy  
15 631 deficiency and its associated factors among lactating women in Debre Tabor general hospital,  
16 632 Northcentral Ethiopia. Journal of Family Medicine and Health Care. 2019;5(1):1-7.
- 18 633 45. Ayalew E, Workineh Y. Nurses' intention to leave their job and associated factors in Bahir  
20 634 Dar, Amhara Region, Ethiopia, 2017. BMC nursing. 2020;19:1-7.
- 22 635 46. Tarekegn F, Asfaw G, Mossie M. Perioperative mortality at Tibebe Ghion Specialized  
23 636 Teaching Hospital, Ethiopia: A longitudinal study design. International Journal of Surgery Open.  
25 637 2020;26:81-5.
- 27 638 47. Harper CM. Clinical Approaches to the Prevention of Inadvertent Perioperative  
28 639 Hypothermia: University of Portsmouth; 2016.
- 30 640 48. Health Nif, Excellence. C. Hypothermia: prevention and management in adults having  
32 641 surgery. Clinical guideline [CG65]. 2016.
- 34 642 49. Chaghari M, Saffari M, Ebadi A, Ameryoun A. Empowering education: A new model for  
35 643 in-service training of nursing staff. Journal of advances in medical education & professionalism.  
37 644 2017;5(1):26.
- 39 645 50. Geleto A, Baraki N, Atomsa GE, Dessie Y. Job satisfaction and associated factors among  
41 646 health care providers at public health institutions in Harari region, eastern Ethiopia: a cross-  
42 647 sectional study. BMC research notes. 2015;8(1):1-7.
- 44 648 51. Link T. Guidelines in Practice: Hypothermia Prevention. . AORN journal 2020  
46 649 Jun;;111(6):653-66.

650

651

652

1  
2  
3 6534  
5  
6 6547  
8 6559  
10  
11 65612  
13 65714  
15  
16 65817  
18  
19 65920  
21 **Figure legend:**22  
23  
24 661 **Figure 1:** Schematic presentation of sampling procedure of nurses' knowledge and practice, and  
25 662 associated factors on hypothermia prevention among surgical patients.  
26  
27  
28  
29  
30  
31  
32  
33  
34  
35  
36  
37  
38  
39  
40  
41  
42  
43  
44  
45  
46  
47  
48  
49  
50  
51  
52  
53  
54  
55  
56  
57  
58  
59  
60

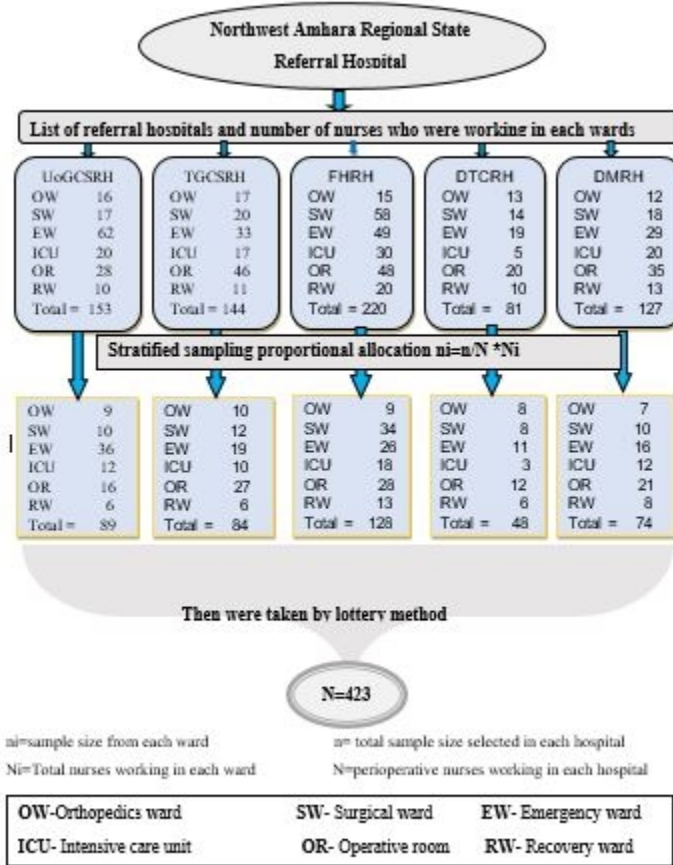

Figure 1: Schematic presentation of sampling procedure of nurses' knowledge and practice, and associated factors on hypothermia prevention among surgical patients.

92x123mm (96 x 96 DPI)

1  
2  
3  
4  
5  
6  
7  
8  
9  
10  
11  
12  
13  
14  
15  
16  
17  
18  
19  
20  
21  
22  
23  
24  
25  
26  
27  
28  
29  
30  
31  
32  
33  
34  
35  
36  
37  
38  
39  
40  
41  
42  
43  
44  
45  
46

## STROBE Statement—checklist of items that should be included in reports of observational studies

|                           | Item No. | Recommendation                                                                                      | Page No. | Relevant text from manuscript                                                                                                                                                                                               |
|---------------------------|----------|-----------------------------------------------------------------------------------------------------|----------|-----------------------------------------------------------------------------------------------------------------------------------------------------------------------------------------------------------------------------|
| <b>Title and abstract</b> | 1        | (a) Indicate the study's design with a commonly used term in the title or the abstract              | 2        | Line (36); An institution-based cross-sectional study was conducted among 423 nurses who are working in perioperative units/wards of five referral hospitals from March 25-May 20/2021.                                     |
|                           |          | (b) Provide in the abstract an informative and balanced summary of what was done and what was found | 2        | Lines (28 – 54); Abstract                                                                                                                                                                                                   |
| <b>Introduction</b>       |          |                                                                                                     |          |                                                                                                                                                                                                                             |
| Background/rationale      | 2        | Explain the scientific background and rationale for the investigation being reported                | 3 and 4  | Lines (63 – 109); Introduction                                                                                                                                                                                              |
| Objectives                | 3        | State-specific objectives, including any pre-specified hypotheses                                   | 4        | Lines (107 – 109); This study aimed to assess nurses' knowledge, practice, and their determinant factors of perioperative hypothermia prevention in Northwest Amhara Regional State Referral Hospitals, Northwest Ethiopia. |
| <b>Methods</b>            |          |                                                                                                     |          |                                                                                                                                                                                                                             |
| Study design              | 4        | Present key elements of study design early in the paper                                             | 4        | Lines (112 – 113); Institutional based cross-sectional study was conducted in perioperative units/wards of five referral hospitals from March 25-May 20/2021.                                                               |



|                              |    |                                                                                                                                                                                                                                                                                                                                                                                                                                                       |             |                                                                                                                                                                                                                                                                                  |
|------------------------------|----|-------------------------------------------------------------------------------------------------------------------------------------------------------------------------------------------------------------------------------------------------------------------------------------------------------------------------------------------------------------------------------------------------------------------------------------------------------|-------------|----------------------------------------------------------------------------------------------------------------------------------------------------------------------------------------------------------------------------------------------------------------------------------|
| Setting                      | 5  | Describe the setting, locations, and relevant dates, including periods of recruitment, exposure, follow-up, and data collection                                                                                                                                                                                                                                                                                                                       | 4, 5, and 6 | Lines (112 – 162); Study design, period, and setting                                                                                                                                                                                                                             |
| Participants                 | 6  | (a) Cohort study—Give the eligibility criteria, and the sources and methods of selection of participants. Describe methods of follow-up<br><br>Case-control study—Give the eligibility criteria, and the sources and methods of case ascertainment and control selection. Give the rationale for the choice of cases and controls<br><br>Cross-sectional study—Give the eligibility criteria and the sources and methods of selection of participants | 6, 7, and 8 | Lines (163 – 170); Source and study population<br><br>Lines (185 – 196); A total of 423 nurses were selected through a stratified random sampling technique, and data was collected from them.<br><br>Lines (197 – 204); Inclusion and exclusion criteria (eligibility criteria) |
|                              |    | (b) Cohort study—For matched studies, give matching criteria and number of exposed and unexposed<br><br>Case-control study—For matched studies, give matching criteria and the number of controls per case                                                                                                                                                                                                                                            | N/A         | This was a cross-sectional study                                                                                                                                                                                                                                                 |
| Variables                    | 7  | Clearly define all outcomes, exposures, predictors, potential confounders, and effect modifiers. Give diagnostic criteria, if applicable                                                                                                                                                                                                                                                                                                              | 8 and 9     | Lines (205 – 227); Operational definition of variables                                                                                                                                                                                                                           |
| Data sources/<br>measurement | 8* | For each variable of interest, give sources of data and details of methods of assessment (measurement). Describe comparability of assessment methods if there is more than one group                                                                                                                                                                                                                                                                  | 9           | Lines (228 – 237); Data collection tools and procedures                                                                                                                                                                                                                          |
| Bias                         | 9  | Describe any efforts to address potential sources of bias                                                                                                                                                                                                                                                                                                                                                                                             | 9           | Lines (238–253); To maintain data quality training was given to data collectors and supervisors. the questionnaire was pretested                                                                                                                                                 |

|                        |    |                                                                                                                                                                               |     |                                                                                                                                                                                                                                                                                                                                                                                                                                                              |
|------------------------|----|-------------------------------------------------------------------------------------------------------------------------------------------------------------------------------|-----|--------------------------------------------------------------------------------------------------------------------------------------------------------------------------------------------------------------------------------------------------------------------------------------------------------------------------------------------------------------------------------------------------------------------------------------------------------------|
|                        |    |                                                                                                                                                                               |     | among 5% of the sample size. Quality is also maintained by close monitoring of the procedure, and checking on the completeness of the data on-site by the responsibility of supervisors and the principal investigator.                                                                                                                                                                                                                                      |
| Study size             | 10 | Explain how the study size was arrived at                                                                                                                                     | 7   | Lines (172–184); The sample size was determined by using a formula to estimate a single population proportion with the assumption of a 95% level of confidence, 50% proportion, and a 5% marginal error.                                                                                                                                                                                                                                                     |
| Quantitative variables | 11 | Explain how quantitative variables were handled in the analyses. If applicable, describe which groupings were chosen and why                                                  | 10  | Lines (259–263); Binary logistic regression was used to determine the significant association between the independent and dependent variables. Those independent variables, which are less than 0.2 in bivariate analysis, were entered into multivariable logistic regressions. Association between the independent variable and dependent variable was considered significant if P-value was less than 0.05 from multivariate logistic regression analysis |
| Statistical methods    | 12 | (a) Describe all statistical methods, including those used to control for confounding                                                                                         | 10  | Lines (254–266); Statistical Analysis                                                                                                                                                                                                                                                                                                                                                                                                                        |
|                        |    | (b) Describe any methods used to examine subgroups and interactions                                                                                                           | N/A | There were no subgroups                                                                                                                                                                                                                                                                                                                                                                                                                                      |
|                        |    | (c) Explain how missing data were addressed                                                                                                                                   | N/A | There was no missing data                                                                                                                                                                                                                                                                                                                                                                                                                                    |
|                        |    | (d) Cohort study—If applicable, explain how loss to follow-up was addressed<br><br>Case-control study—If applicable, explain how matching of cases and controls was addressed | N/A | Lines (186 – 196); A total of 423 nurses were selected through a stratified random sampling technique, and data was collected from them                                                                                                                                                                                                                                                                                                                      |

|                  |     |                                                                                                                                                                                                   |                |                                                                                                                                                                                                                                                                                                                                                                                                                                             |
|------------------|-----|---------------------------------------------------------------------------------------------------------------------------------------------------------------------------------------------------|----------------|---------------------------------------------------------------------------------------------------------------------------------------------------------------------------------------------------------------------------------------------------------------------------------------------------------------------------------------------------------------------------------------------------------------------------------------------|
|                  |     | Cross-sectional study—If applicable, describe analytical methods taking account of sampling strategy                                                                                              |                |                                                                                                                                                                                                                                                                                                                                                                                                                                             |
|                  |     | (e) Describe any sensitivity analyses                                                                                                                                                             | N/A            |                                                                                                                                                                                                                                                                                                                                                                                                                                             |
| <b>Results</b>   |     |                                                                                                                                                                                                   |                |                                                                                                                                                                                                                                                                                                                                                                                                                                             |
| Participants     | 13* | (a) Report numbers of individuals at each stage of study—eg numbers potentially eligible, examined for eligibility, confirmed eligible, included in the study, completing follow-up, and analysed | N/A            | This was a cross-sectional study with only one stage.                                                                                                                                                                                                                                                                                                                                                                                       |
|                  |     | (b) Give reasons for non-participation at each stage                                                                                                                                              | N/A            |                                                                                                                                                                                                                                                                                                                                                                                                                                             |
|                  |     | (c) Consider use of a flow diagram                                                                                                                                                                | N/A            |                                                                                                                                                                                                                                                                                                                                                                                                                                             |
| Descriptive data | 14* | (a) Give characteristics of study participants (eg demographic, institutional, other) and information on exposures and potential confounders                                                      | 11, 12, and 13 | Line (287-289); Table 1: Sociodemographic characteristics of the study participants on hypothermia prevention among perioperative patients in Amhara Regional State Referral Hospitals, Northwest Ethiopia, 2021(N=413).<br><br>Line (298-299); Table 2: Institutional and other related factors of the respondents on perioperative hypothermia prevention in Amhara Regional State Referral Hospitals, Northwest Ethiopia, 2021. (N=413). |
|                  |     | (b) Indicate number of participants with missing data for each variable of interest                                                                                                               | N/A            | There was no missing data                                                                                                                                                                                                                                                                                                                                                                                                                   |
|                  |     | (c) Cohort study—Summarise follow-up time (eg, average and total amount)                                                                                                                          | N/A            | This was a cross-sectional study                                                                                                                                                                                                                                                                                                                                                                                                            |

|              |     |                                                                                                                                                                                                              |                    |                                                                                                                                                                                                                                                                                                                                                                                                                                                                                                                                                                                                                                                                                                                                   |
|--------------|-----|--------------------------------------------------------------------------------------------------------------------------------------------------------------------------------------------------------------|--------------------|-----------------------------------------------------------------------------------------------------------------------------------------------------------------------------------------------------------------------------------------------------------------------------------------------------------------------------------------------------------------------------------------------------------------------------------------------------------------------------------------------------------------------------------------------------------------------------------------------------------------------------------------------------------------------------------------------------------------------------------|
| Outcome data | 15* | Cohort study—Report numbers of outcome events or summary measures over time                                                                                                                                  | N/A                | This was cross-sectional study                                                                                                                                                                                                                                                                                                                                                                                                                                                                                                                                                                                                                                                                                                    |
|              |     | Case-control study—Report numbers in each exposure category, or summary measures of exposure                                                                                                                 | N/A                | This was a cross-sectional study                                                                                                                                                                                                                                                                                                                                                                                                                                                                                                                                                                                                                                                                                                  |
|              |     | Cross-sectional study—Report numbers of outcome events or summary measures                                                                                                                                   | 14 and 17          | <p>Lines (292–293); In this study, 244 (59.1%) with 95% CI: (54.7, 63.7) of the participants had good knowledge while the rest were not knowledgeable.</p> <p>Lines (292–293); In this study, 208 (50.4%) with 95% CI: (45.5, 55) of the participants had good practice.</p>                                                                                                                                                                                                                                                                                                                                                                                                                                                      |
| Main results | 16  | (a) Give unadjusted estimates and, if applicable, confounder-adjusted estimates and their precision (eg, 95% confidence interval). Make clear which confounders were adjusted for and why they were included | 14, 17, 19, and 21 | <p>Lines (302-303); In this study, 244 (59.1%) with 95% CI: (54.7, 63.7) of the participants had good knowledge while the rest were not knowledgeable.</p> <p>Lines (321-322); In this study, 208 (50.4%) with 95% CI: (45.5, 55) of the participants had a good practice.</p> <p>Lines (344-345); Table 3- Bi-variable and multivariable analysis of factors associated with knowledge of nurses on perioperative hypothermia prevention in Amhara Region Referral Hospitals, Northwest Ethiopia.</p> <p>Lines (362-363); Table 4- Bi-variable and multivariable analysis of factors associated with the practice of nurses on perioperative hypothermia prevention in Amhara Region Referral Hospitals, Northwest Ethiopia.</p> |

|                   |    |                                                                                                                                                                            |       |                                                                                                                                                                                                                                                                                                                                                                                                                                                                                                        |
|-------------------|----|----------------------------------------------------------------------------------------------------------------------------------------------------------------------------|-------|--------------------------------------------------------------------------------------------------------------------------------------------------------------------------------------------------------------------------------------------------------------------------------------------------------------------------------------------------------------------------------------------------------------------------------------------------------------------------------------------------------|
|                   |    | (b) Report category boundaries when continuous variables were categorized                                                                                                  | N/A   | There was no continuous variable.                                                                                                                                                                                                                                                                                                                                                                                                                                                                      |
|                   |    | (c) If relevant, consider translating estimates of relative risk into absolute risk for a meaningful time period                                                           | N/A   | There was no estimates of relative risk.                                                                                                                                                                                                                                                                                                                                                                                                                                                               |
| Other analyses    | 17 | Report other analyses done—eg analyses of subgroups and interactions, and sensitivity analyses                                                                             | N/A   | There was no sub groups and sensitivity analysis.                                                                                                                                                                                                                                                                                                                                                                                                                                                      |
| <b>Discussion</b> |    |                                                                                                                                                                            |       |                                                                                                                                                                                                                                                                                                                                                                                                                                                                                                        |
| Key results       | 18 | Summarise key results with reference to study objectives                                                                                                                   | 24-26 | Lines (370–449); Discussion                                                                                                                                                                                                                                                                                                                                                                                                                                                                            |
| Limitations       | 19 | Discuss limitations of the study, taking into account sources of potential bias or imprecision. Discuss both direction and magnitude of any potential bias                 | 26    | Lines (450–453); A self-reported questionnaire measure of knowledge and practice of nurses on the prevention of perioperative hypothermia is prone to social desirability bias and recall bias. Furthermore, this study was not triangulated with a qualitative method.                                                                                                                                                                                                                                |
| Interpretation    | 20 | Give a cautious overall interpretation of results considering objectives, limitations, multiplicity of analyses, results from similar studies, and other relevant evidence | 24-26 | Lines (370-449); Discussion                                                                                                                                                                                                                                                                                                                                                                                                                                                                            |
| Generalizability  | 21 | Discuss the generalizability (external validity) of the study results                                                                                                      | 27    | Lines (458-463); This study revealed that nurses' knowledge and practice regarding the prevention of perioperative hypothermia was found to be inadequate as compared to the recommended guidelines. Having higher educational status, being male, and attending training showed a positive and significant association with good knowledge of perioperative hypothermia prevention. Whereas, factors contributing to practice were working ward, training, job satisfaction, and knowledge of nurses. |

|                          |    |                                                                                                                                                               |    |                                                                                                                        |
|--------------------------|----|---------------------------------------------------------------------------------------------------------------------------------------------------------------|----|------------------------------------------------------------------------------------------------------------------------|
| <b>Other information</b> |    |                                                                                                                                                               |    |                                                                                                                        |
| Funding                  | 22 | Give the source of funding and the role of the funders for the present study and, if applicable, for the original study on which the present article is based | 28 | This research received no specific grant from any funding agency in the public, commercial, or not-for-profit sectors. |

\*Give information separately for cases and controls in case-control studies and, if applicable, for exposed and unexposed groups in cohort and cross-sectional studies.

For peer review only

# BMJ Open

## Knowledge and Practice of nurses regarding Perioperative Hypothermia Prevention at Northwest Amhara Regional State Referral Hospitals, Northwest Ethiopia: a cross-sectional study

|                                 |                                                                                                                                                                                                                                                                                                                                                                                                                                                      |
|---------------------------------|------------------------------------------------------------------------------------------------------------------------------------------------------------------------------------------------------------------------------------------------------------------------------------------------------------------------------------------------------------------------------------------------------------------------------------------------------|
| Journal:                        | <i>BMJ Open</i>                                                                                                                                                                                                                                                                                                                                                                                                                                      |
| Manuscript ID                   | bmjopen-2022-068131.R1                                                                                                                                                                                                                                                                                                                                                                                                                               |
| Article Type:                   | Original research                                                                                                                                                                                                                                                                                                                                                                                                                                    |
| Date Submitted by the Author:   | 03-May-2023                                                                                                                                                                                                                                                                                                                                                                                                                                          |
| Complete List of Authors:       | Woretaw, Ashenafi; University of Gondar College of Medicine and Health Sciences, Surgical Nursing Department<br>Yimer Mekkonen, Bezenaw; University of Gondar, Emergency and Critical Care Nursing Department<br>Tsegaye, Netsanet; University of Gondar College of Medicine and Health Sciences, Emergency and Critical Care nursing<br>Dellie, Endalkachew; University of Gondar College of Medicine and Health Sciences, Health System and policy |
| <b>Primary Subject Heading</b>: | Nursing                                                                                                                                                                                                                                                                                                                                                                                                                                              |
| Secondary Subject Heading:      | Surgery, Nutrition and metabolism                                                                                                                                                                                                                                                                                                                                                                                                                    |
| Keywords:                       | NUTRITION & DIETETICS, PAIN MANAGEMENT, SURGERY                                                                                                                                                                                                                                                                                                                                                                                                      |
|                                 |                                                                                                                                                                                                                                                                                                                                                                                                                                                      |

SCHOLARONE™  
Manuscripts

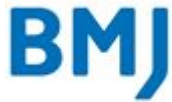

I, the Submitting Author has the right to grant and does grant on behalf of all authors of the Work (as defined in the below author licence), an exclusive licence and/or a non-exclusive licence for contributions from authors who are: i) UK Crown employees; ii) where BMJ has agreed a CC-BY licence shall apply, and/or iii) in accordance with the terms applicable for US Federal Government officers or employees acting as part of their official duties; on a worldwide, perpetual, irrevocable, royalty-free basis to BMJ Publishing Group Ltd ("BMJ") its licensees and where the relevant Journal is co-owned by BMJ to the co-owners of the Journal, to publish the Work in this journal and any other BMJ products and to exploit all rights, as set out in our [licence](#).

The Submitting Author accepts and understands that any supply made under these terms is made by BMJ to the Submitting Author unless you are acting as an employee on behalf of your employer or a postgraduate student of an affiliated institution which is paying any applicable article publishing charge ("APC") for Open Access articles. Where the Submitting Author wishes to make the Work available on an Open Access basis (and intends to pay the relevant APC), the terms of reuse of such Open Access shall be governed by a Creative Commons licence – details of these licences and which [Creative Commons](#) licence will apply to this Work are set out in our licence referred to above.

Other than as permitted in any relevant BMJ Author's Self Archiving Policies, I confirm this Work has not been accepted for publication elsewhere, is not being considered for publication elsewhere and does not duplicate material already published. I confirm all authors consent to publication of this Work and authorise the granting of this licence.



1  
2  
3 **1 Knowledge and Practice of nurses regarding Perioperative Hypothermia Prevention at**  
4 **2 Northwest Amhara Regional State Referral Hospitals, Northwest Ethiopia: a cross-**  
5 **3 sectional study**

6  
7  
8  
9 4 Ashenafi Worku Woretaw<sup>1</sup>, Bezenaw Yimer Mekkonen <sup>2</sup>, Netsanet Tsegaye<sup>2</sup>, and Endalkachew  
10  
11 5 Dellie<sup>3</sup>

12  
13 6 <sup>1</sup>Department of Surgical Nursing, School of Nursing, College of Medicine and Health Sciences,  
14  
15 7 University of Gondar, Gondar, Ethiopia

16  
17 8 <sup>2</sup>Department of Emergency and Critical Care Nursing, School of Nursing, College of Medicine  
18  
19 9 and Health Sciences, University of Gondar, Gondar, Ethiopia

20  
21 10 <sup>3</sup>Department of Health Systems and Policy, Institute of Public Health, College of Medicine and  
22  
23 11 Health Sciences, University of Gondar, Gondar, Ethiopia

24  
25 12 **Email addresses:**

26  
27 13 Ashenafi Worku Woretaw (AWW): [ashuw2007@gmail.com](mailto:ashuw2007@gmail.com)

28  
29 14 Institutional email: [Ashenafi.Worku@uog.edu.et](mailto:Ashenafi.Worku@uog.edu.et)

30  
31 15 Bezenaw Yimer Mekkonen (BY): [bezym2007@gmail.com](mailto:bezym2007@gmail.com)

32  
33 16 Netsanet Tsegaye (NT): [netsanet.gondar@gmail.com](mailto:netsanet.gondar@gmail.com)

34  
35 17 Endalkachew Dellie (ED): [endalkd.07@gmail.com](mailto:endalkd.07@gmail.com)

36  
37  
38  
39 18 **\*Correspondence author:**

40  
41 19 AWW: [ashuw2007@gmail.com](mailto:ashuw2007@gmail.com)

42  
43  
44 20 PO Box: 196, University of Gondar, Gondar, Ethiopia

45  
46 21 **Word count:** 3,988 (Introduction to conclusion; excluding tables and figure).

47  
48  
49 22

50  
51  
52 23

53  
54 24

55  
56 25

## 26 Abstract

27 **Objectives** Nurses are the primary responsible body to prevent the occurrence of hypothermia  
28 among surgical patients, as it has been reported that maintenance of normothermia decreases the  
29 length of hospitalization by approximately up to 40%, risk of surgical site infection by 64%, and  
30 also mortality rate by four folds. Therefore, the aim of this study was to assess nurses'  
31 knowledge, practices, and associated factors toward perioperative hypothermia prevention.

32 **Design** Cross-sectional study design.

33 **Setting** Northwest Amhara Regional State Referral Hospitals, Northwest Ethiopia.

34 **Participants** 413 nurses.

35 **Main outcome measures** Perioperative hypothermia prevention knowledge and practices among  
36 nurses

37 **Results** A total of 244 (59.1%) of the respondents had good knowledge and 208 (50.4%) had  
38 good practice in perioperative hypothermia prevention. Factors affecting nurses' knowledge on  
39 prevention of perioperative hypothermia were being male [AOR = 1.61, 95% CI (1.02-2.53)],  
40 having a bachelor, and master's degree [AOR = 2.50; 95% CI (1.25-5.00), and 4.39; (1.45-  
41 13.20)] respectively, and took training [AOR = 3.68; 95% CI (2.14-6.33)]. Whereas nurses who  
42 were working in recovery and intensive care units [AOR = 2.87; 95% CI (1.08-7.58), and 2.39;  
43 95% CI (1.09-5.22)] respectively, took training [AOR = 2.64; 95% CI (1.53-4.57)], had a Job  
44 satisfaction [AOR 2.15; 95% CI (1.34-3.43)], and knowledgeable nurses [AOR 2.64; 95% CI  
45 (1.63-4.27)] were factors affecting nurse's practice on perioperative hypothermia prevention.

46 **Conclusion** Nurses' knowledge and practice regarding prevention of perioperative hypothermia  
47 were found to be inadequate. So, it is better to strengthen training, educational opportunity, equip  
48 wards with standardized guidelines and materials, and motivate and create a safe working  
49 environment.

50 **Keywords:** Perioperative hypothermia, Ethiopia, Knowledge, Practice, Nurses.

## 51 Limitations and Strength of the study

- 52 ■ Due to the time constraint, observational data collection method was not done.
- 53 ■ Furthermore, this study was not triangulated with the qualitative method
- 54 ■ Due to the limited availability of literature, I have used unpublished sources.
- 55 ■ Despite these limitations, this study covers large setting area.

## 56 **Background**

57 Hypothermia is a common health problem in patients having surgery, that is characterized as a  
58 body temperature below 36 °c (96.8°F) and it is usually caused by too much heat loss from cold  
59 weather exposure, anesthetic effect, and administration of cold intravenous, or irrigation fluids  
60 (1-3). Hypothermia decelerates all physiologic roles including metabolic rate, mental awareness,  
61 nerve conduction, neuromuscular reaction times, and both the cardiovascular and respiratory  
62 systems, consequently disturbing patients' comfort and leading to longer hospitalizations, higher  
63 costs, and increased mortality (1, 4).

64 Different studies conducted in different areas revealed that the magnitude of perioperative  
65 hypothermia in Brazil 56.7%(5), in Australia 74% (6), in Turkey research hospital in Ankara,  
66 and Trakya University Hospital were 78.6% and 63.3% respectively (7, 8). Another studies  
67 conducted in Ethiopia, Tikur Anbessa Specialized Hospital the overall magnitude of  
68 preoperative, intraoperative, and postoperative hypothermia were 16.2%, 53.2%, and 31.3%,  
69 respectively (9) while, in University of Gondar Comprehensive Specialized Hospital  
70 (UoGCSRH) the incidence of Pre, Intra, and post-operative hypothermia were 23.4%, 49.7%,  
71 and 50.6% respectively (10). But available literature shows that nurses' knowledge and practice  
72 towards perioperative hypothermia prevention is low despite the high incidence, serious  
73 consequences, and availability of effective interventions to prevent and treat this frequent  
74 surgical complication (2, 11). Interventional studies conducted on perioperative hypothermia  
75 prevention in Brazil and Turkey, 55.9% and 61.77% of nurses had good knowledge respectively  
76 before they were taken the training (4, 12). Other cross-sectional study done in Ethiopia  
77 regarding perioperative hypothermia prevention on trauma patients, only 52.1% of nurses were  
78 had good knowledge (13). While studies conducted in south Africa and Gambia, 46% and 19%  
79 of nurses had good practice respectively on perioperative hypothermia prevention (11, 14).

80 According to the Association of Perioperative Register Nurses (AORN) Guideline, nurses need  
81 to have knowledge and skill on hypothermia prevention at the perioperative phase. This includes  
82 measuring the patient's body temperature, selecting methods for prevention of unintended  
83 hypothermia, and implementing the selected insulation and warming interventions (15).  
84 Warming intervention measures include warming patients before surgery, during surgery, and

1  
2  
3 85 after surgery by using passive insulation and active warming methods such as warmed cotton  
4  
5 86 blankets, surgical draping, thermal garments, forced-air warming devices, electric warming  
6  
7 87 blankets, and warmed fluids (16, 17).  
8

9 88 Preventing heat loss and maintaining normothermia are important nursing care in an early phase  
10  
11 89 of resuscitation as metabolic changes accompanied by injury cannot be corrected when patients  
12  
13 90 are in hypothermic status (18). Nurses need to be cognizant of the risks associated with each  
14  
15 91 perioperative phase of the patient in the prevention of hypothermia(19). Preserving a normal  
16  
17 92 body temperature during the surgical experience enhances the patient's chance of preventing  
18  
19 93 postoperative complications (20). Different evidence reported that the maintenance of  
20  
21 94 normothermia decreases the length of hospitalization by approximately up to 40%, risk of  
22  
23 95 surgical site infection by 64%, may prevent the costs of potential stay in the intensive care unit  
24  
25 96 by \$1,000 and a prolonged hospital stay by \$465 per day, and also decreasing mortality rate by  
26  
27 97 four folds (21-23).  
28

29 98 If nurses had not adequate knowledge and skill on the prevention of perioperative hypothermia,  
30  
31 99 its occurrence is inevitable. Even if nurses knowledge and practice are important in prevention of  
32  
33 100 perioperative hypothermia and its complication, available literature revealed that nurses had  
34  
35 101 significant knowledge and practice gaps (13). Different socio-demographic and institutional  
36  
37 102 factors which include age, marital status, educational level, work experience, presence of  
38  
39 103 guidelines and risk assessment protocol, taking training, reading updated evidence, and job  
40  
41 104 satisfaction affect nurses' knowledge and practice (2, 11, 24, 25).  
42

43 105 In Ethiopia, there are no studies is available regarding nurses' knowledge and practice on  
44  
45 106 perioperative hypothermia prevention. Therefore, the purpose of this study is to assess nurses'  
46  
47 107 knowledge, practice, and their determinant factors of perioperative hypothermia prevention in  
48  
49 108 Northwest Amhara Regional State Referral Hospitals, Northwest Ethiopia.  
50

## 51 109 **Methods**

### 52 110 **Study design and period**

53 111 Institutional based cross-sectional study was conducted in perioperative units/wards of five  
54  
55 112 referral hospitals from March 25-May 20/2021.  
56

## 113 **Study area**

114 The study was conducted in Northwest Amhara Regional State Referral Hospitals, Northwest  
115 Ethiopia. Northwest Amhara is found in the northwestern part of Ethiopia. There are five  
116 government referral hospitals in Northwest Amhara regional state such as University of Gondar  
117 Comprehensive Specialized Referral Hospital (UoGCSRH), Felege Hiwot Referral Hospital  
118 (FHRH), Tibebe Gion Specialized Referral Hospital (TGSRH), Debre Markos Referral Hospital  
119 (DMRH), and Debre Tabor Comprehensive Referral Hospital (DTCRH). All hospitals provide  
120 outpatient and inpatient services for more than 22,000,000 million people living in their  
121 catchment area. Surgical department is one of the actively serving departments giving emergency  
122 and elective surgery among the service given by the hospitals. All five hospitals have different  
123 surgical units in their surgical department such as surgical emergency ward, operation room,  
124 recovery ward, surgical ward, orthopedics ward, and surgical intensive care unit (ICU).  
125 According to information obtained from the administrative offices of these hospitals, there are  
126 1682 nurses, who provide services. Among those 725 nurses (153 in UoGCSRH, 220 in FHRH,  
127 144 in TGSRH, 127 in DMRH, and 81 in DTCRH) are working in our study unit (26-30). Nurses  
128 who are working in perioperative unit provide different hypothermia preventive activities like  
129 covering of patients by linens and blanket, measure patients' temperature, warming of  
130 intravenous fluids; adjust room temperature and so on. Because preventing perioperative  
131 hypothermia is a crucial role for nurses.

## 132 **Source population**

133 Source populations were all nurses who were working in emergency, operation room, recovery  
134 ward, surgical ward, orthopedics ward, and surgical ICU ward of Northwest Amhara Regional  
135 State Referral Hospitals, Northwest Ethiopia.

## 136 **Study population**

137 The study population included nurses who were working in emergency ward, operation room,  
138 recovery ward, surgical ward, orthopedics ward, and surgical ICU wards of UoGCSRH,  
139 DTCRH, DMRH, TGRH, and FHRH during the data collection period.

## 140 **Sample size and sampling procedure**

### 141 **Sample size**

1  
2  
3 142 The sample size of the study was calculated using the formula for the estimation of a single  
4  
5 143 population proportion and the assumptions were the proportion of knowledge and practice of  
6  
7 144 nurses regarding hypothermia prevention was 50% (since there was no study conducted in our  
8  
9 145 country), with 95% level of confidence and 5% margin of error. By using a z-value of 1.96 at  
10  
11 146 95% CI the minimum sample size for this study was:

12 147 As:  $n = Z_{\alpha/2}^2 * P (1-P) / d^2$

13  
14 148 n = sample size

15 149 p = proportion of knowledge & practice of nurses on hypothermia prevention =0.5

16  
17 150 d = maximum allowable error (margin of error) = 0.05

18  
19 151 Z = value of standard normal distribution at 95% confidence level ( $z=1.96$ ).

20  
21 152  $n = (1.96) (1.96) *(0.5) (1-0.5) / (0.05) (0.05) =384$  subjects;

22  
23 153  $\Rightarrow$  By adding 10% allowance for non-response rate the total sample size were

24  
25 154  $384+10%=423$

### 26 27 155 **Sampling procedure**

28  
29 156 The study was performed on nurses who were working at the emergency surgical (including  
30  
31 157 trauma unit), operation room, recovery ward, surgical ward, orthopedics ward, and surgical ICU  
32  
33 158 ward of Northwest Amhara Regional State Referral Hospitals, Northwest Ethiopia. A stratified  
34  
35 159 sampling technique was employed to recruit the required participant for the study. First, the  
36  
37 160 study participants are stratified from each hospital and working ward/unit and allocated the  
38  
39 161 required sample for each stratum proportionally. According to all hospitals of human resources,  
40  
41 162 administration reports the total number of nurses who were working in these units or wards was  
42  
43 163 725. Based on the number of nurses working in each hospital, 423 samples were proportionally  
44  
45 164 allocated from 725 (from 153 - 89 in UoGCSRH, from 144 - 84 in TGRH, from 220 -128 in  
46  
47 165 FHRH, from 81 - 48 in DTRH, and 127 - 74 in DMRH). Finally, those participants were taken  
48  
49 166 by lottery method of simple random sampling technique from each sampling frame  
50  
51 167 (Supplemental Figure)

### 52 53 168 **Inclusion and exclusion criteria**

54  
55 169 All nurses who were working in the surgical emergency, operation room, recovery ward, surgical  
56  
57 170 ICU, surgical & orthopedic ward of Northwest Amhara Regional State Referral Hospitals,  
58  
59 171 Northwest Ethiopia during the time of data collection were included in this study.

1  
2  
3 172 Matron and ward coordinator nurses were excluded because those nurses are primarily  
4 responsible is coordinating, monitoring, and evaluating the staff nurses rather they doing routine  
5 173 activities.  
6  
7 174

### 8 175 **Operational definitions**

9  
10 176 **Knowledge:** Is theoretical or practical understanding of hypothermia and its prevention method  
11 through education or experience. Based on this research the percentage scores were graded as  
12 177 'poor', and 'good to determine the knowledge level.  
13  
14 178

15  
16 179 **Good knowledge:** If the study participants answer the knowledge questions above or equal to the  
17 computed median were considered as having good knowledge.  
18 180

19  
20 181 **Poor knowledge:** If the study participants answer, the knowledge questions below the computed  
21 median were considered as having poor knowledge.  
22 182

23  
24 183 **Practice:** Activities acting by nurses to prevent hypothermia. Items in this category of the Likert  
25 scale were coded as 0 to 2 for: never, sometimes, and always.  
26 184

27  
28 185 **Good practice:** The study participants who answer above or equal to the computed median of  
29 practice questions were considered as having good practice.  
30 186

31  
32 187 **Poor practice:** The study participants who answer below the computed median of practice  
33 questions were considered as having poor practice.  
34 188

35  
36 189 **Job satisfaction:** When the total score for the job satisfaction questionnaire was greater than or  
37 equal to the computed median, we said they were satisfied, and less than the computed median,  
38 190 we said they were dissatisfied with the overall aspect of their work.  
39 191  
40  
41  
42

### 43 192 **Data collection instruments and procedure**

44  
45  
46 193 Data was collected by using a self-administered questionnaire which was adapted from  
47 guidelines of AORN and NICE perioperative hypothermia prevention, and other literature which  
48 194 involves 27 questions for knowledge and 14 questions for practice (11, 31-33), and 15 questions  
49 195 for Socio-demographic, institutional and other characteristics (2, 4, 11, 24, 25, 31, 34). The  
50 196 questioners were prepared in the English language based on the study objectives, focusing on the  
51 197 background information of hypothermia and its prevention. Five BSc nurse staff who was  
52  
53  
54  
55 198

1  
2  
3 199 working other than the study wards were recruited for data collection and two MSc holder nurses  
4  
5 200 were recruited as a supervisor. Overall, the data collection process was coordinate and supervises  
6  
7 201 by the principal investigator.

### 8 9 202 **Data quality control**

10  
11 203 In order to ensure the quality of the collected data, data collectors and supervisors underwent  
12  
13 204 one-day training on the purpose of the study and the data collection procedure. The questionnaire  
14  
15 205 was additionally pretested at Woldia Comprehensive Referral Hospital with 5% of the sample  
16  
17 206 size. Internal consistency was checked by computing Cronbach's  $\alpha$  for both dependent variable  
18  
19 207 and job satisfaction questionnaires. The tests were shows 0.81, 0.77, and 0.91 for knowledge,  
20  
21 208 practice, and job satisfaction respectively. Supervisors and primary investigator conducted  
22  
23 209 routine supervision to verify the consistency and completeness of the questionnaires that were  
24  
25 210 filled out. Incomplete questionnaires were put in offices arranged for this purpose so that  
26  
27 211 participants completed their questionnaires.

### 28 212 **Data processing and analysis**

29  
30 213 After the data was checked for its consistency and completeness, data were entered into Epi Info  
31  
32 214 version 7 and exported into SPSS version 25 for analysis. A frequency table was used to describe  
33  
34 215 the participant characteristics knowledge and practice scores. Multicollinearity was checked by  
35  
36 216 using the variance inflation factor and its values were between 1 and 10. Model adequacy was  
37  
38 217 checked by using Hosmer-Lemeshow goodness of fit test and the model was fitted well which  
39  
40 218 indicates .856 and .993 for knowledge and practice respectively. Binary logistic regression was  
41  
42 219 used to determine the significant association between the independent and dependent variables.  
43  
44 220 Those independent variables, which are less than 0.2 in bivariate analysis, were entered into  
45  
46 221 multivariable logistic regressions. Association between the independent variable and dependent  
47  
48 222 variable was considered significant if P-value was less than 0.05 from multivariate logistic  
49  
50 223 regression analysis.

### 51 224 **Patient and public involvement**

52 225 It was not appropriate or possible to involve patients or public in the design, conduct, report or  
53  
54 226 dissemination plans of our research because this study was done on Nurses.



## 227 Results

### 228 Socio-demographic characteristics of the respondents

229 A total of 423, with a response rate of 97.6% of study participants were involved in this study.  
 230 The median age (IQR) of the study participants was 29 (27, 32) years, ranging from 20-58 years  
 231 and almost half of the participants were under the age category between 26 to 30 years. Two  
 232 hundred thirteen (51.6%) of the participants were male, and 235(56.9%) were married. Out of  
 233 413 nurses, three-fourth of the respondents had a bachelor's degree (Table1).

234 Table 1: Socio-demographic characteristics of the study participants on perioperative  
 235 hypothermia prevention in Amhara Regional State Referral Hospitals, Northwest Ethiopia,  
 236 2021(N=413).

| Variable           | Response   | Frequency (N=413) | Percentage (%) |
|--------------------|------------|-------------------|----------------|
| Sex                | Male       | 213               | 51.6           |
|                    | Female     | 200               | 48.4           |
| Age                | ≤ 25 years | 53                | 12.8           |
|                    | 26-30      | 224               | 54.2           |
|                    | 31-35      | 86                | 20.8           |
|                    | ≥ 35       | 50                | 12.1           |
| Marital status     | Single     | 163               | 39.5           |
|                    | Married    | 235               | 56.9           |
|                    | Divorced   | 12                | 2.9            |
|                    | Widowed    | 3                 | .7             |
| Educational status | Diploma    | 59                | 14.3           |
|                    | Degree     | 311               | 75.3           |
|                    | Master     | 43                | 10.4           |

|                            |           |     |      |
|----------------------------|-----------|-----|------|
| <b>Work experience</b>     | ≤ 5 years | 157 | 38   |
|                            | 6-10      | 181 | 43.8 |
|                            | 11-15     | 57  | 13.8 |
|                            | ≥ 16      | 18  | 4.4  |
| <b>Monthly salary(ETB)</b> | ≤ 5000    | 42  | 10.2 |
|                            | 5001-7000 | 158 | 38.3 |
|                            | 7001-9000 | 172 | 41.6 |
|                            | ≥ 9001    | 41  | 9.9  |

237 *ETB- Ethiopian Birr*

### 238 **Institutional and job-related factors of the respondents**

239 From 413, 268(64.9%) of nurses did not take training about perioperative hypothermia  
 240 prevention. half of the respondents reports that they were reading or reviewing updated evidence,  
 241 and only 121(29.3%) of participants have notified the presence of guidelines or protocols in their  
 242 working area. Out of the study participants 268 (64.9%) and 342 (82.8%) were having a shortage  
 243 of thermometers and warming materials respectively. From 413 study participants near half of  
 244 217 (52.5%) participants were satisfied with their jobs (Supplemental Table).

### 245 **Knowledge of nurses on hypothermia prevention**

246 The overall median knowledge score of the study participants on perioperative hypothermia  
 247 prevention was 18 with an IQR of (16, 21). In this study, 244 (59.1%) with 95% CI: (54.7, 63.7)  
 248 of the participants had good knowledge. Among a total of knowledge assessment questions,  
 249 359(86.9%) and 288(69.7%) of participants have correctly answered the statement about the  
 250 definition of thermoregulation and perioperative hypothermia respectively. Three-fourth of the  
 251 participants gave the correct answer of anesthetic drugs increase heat loss while 250(60.5) of the  
 252 participants correctly answered the complications of hypothermia in surgical patients. Only  
 253 83(20.1%) of the participants were correctly respond in the theatre room, the patient's

254 temperature should be measured every 30 minutes while in the recovery room, every 15 minutes  
 255 (Table 2).

256 Table 2. Nurse's responses on knowledge of perioperative hypothermia prevention (N=413)

| Statements about perioperative hypothermia prevention                                                                                                                                      | True/<br>False | Correct answer |      | Wrong answer<br>/I don't know |      |
|--------------------------------------------------------------------------------------------------------------------------------------------------------------------------------------------|----------------|----------------|------|-------------------------------|------|
|                                                                                                                                                                                            |                | N              | %    | N                             | %    |
| The internal environment of humans can be maintained by thermoregulation.                                                                                                                  | T*             | 359            | 86.9 | 54                            | 13.1 |
| PH at any time during the perioperative cycle is characterized as a core body temperature < 36 ° C.                                                                                        | T*             | 288            | 69.7 | 125                           | 30.3 |
| Anesthetic drugs decrease heat loss in surgical patients.                                                                                                                                  | F**            | 311            | 75.3 | 102                           | 24.7 |
| Cold IV fluids and blood products increase heat loss.                                                                                                                                      | T*             | 288            | 69.5 | 126                           | 30.5 |
| PH is not associated with complications such as changes in drug metabolism, healing complications, shivering, clotting defects, cardiac morbidity, and prolonged post-anesthetic recovery. | F**            | 250            | 60.5 | 163                           | 39.5 |
| To minimize post-operative complications, nurses should advise patients to bring along additional clothing to help them stay warm before surgery                                           | T*             | 339            | 82.1 | 74                            | 17.9 |
| The pulmonary artery catheter, distal esophagus, urinary bladder, rectum, zero heat-flux are some of the sites for temperature measurements.                                               | T*             | 174            | 42.1 | 239                           | 57.9 |
| Nurses should be well trained and knowledgeable about the use of both temperature recording and warming devices                                                                            | T*             | 346            | 83.8 | 67                            | 16.2 |
| Forced-air warming devices, warm water circulating and conductive devices are not some of the devices for warming surgical patients                                                        | F**            | 241            | 58.4 | 172                           | 41.6 |
| The method for temperature monitoring should not be chosen based on the criteria for a procedure                                                                                           | F**            | 281            | 68   | 132                           | 32   |
| To ensure accurate information, the team takes the patient's temperature at 15- minute intervals using different measuring devices at different sites.                                     | F**            | 138            | 33.4 | 275                           | 66.6 |
| Patients with temperature < 36.0°C undergoing anesthesia & those having a high risk of cardiovascular complications are at higher risk for IPH                                             | T*             | 293            | 70.9 | 120                           | 29.1 |
| It is not necessary to measure patients' temperature in the hour before departing the ward since it will be measured at the theatre.                                                       | F**            | 279            | 67.6 | 134                           | 32.4 |

|                            |                                                                                                                                                   |     |     |      |     |      |
|----------------------------|---------------------------------------------------------------------------------------------------------------------------------------------------|-----|-----|------|-----|------|
| 1<br>2<br>3<br>4<br>5<br>6 | Except in urgent circumstances, preoperative patients with temperatures of < 36.0°C should be warmed for 30' by using active warming method       | T*  | 284 | 68.8 | 129 | 31.2 |
| 7<br>8<br>9                | Special attention should be given to the comfort of surgical patients having difficulties expressing themselves                                   | T*  | 335 | 81.1 | 78  | 18.9 |
| 10<br>11<br>12<br>13       | The method for warming patients should be chosen based on planned procedure, patient position, IV access site, and warming equipment constraints. | T*  | 333 | 80.6 | 80  | 19.4 |
| 14<br>15<br>16             | Critical incidence reporting is not necessary for patients coming into the theatre with a temperature of less than 36.0°C.                        | F** | 259 | 62.7 | 154 | 37.3 |
| 17<br>18<br>19             | Induction of anesthesia should not begin unless the patient's temperature is 36.0°C or above.                                                     | T*  | 203 | 49.2 | 210 | 50.8 |
| 20<br>21<br>22<br>23       | The theatre's room temperature should be at least 21°C which can be adjusted to allow better working once active warming is initiated.            | T*  | 273 | 66.1 | 140 | 33.9 |
| 24<br>25<br>26             | All irrigation fluids used intraoperative should be warmed in a thermostatically controlled cabinet to a temperature of 38- 40°C.                 | T*  | 214 | 51.8 | 199 | 48.2 |
| 27<br>28<br>29             | Fluid warming devices should be used to warm IV fluids (500mls or more) & blood products to 37°C                                                  | T*  | 260 | 63   | 153 | 37   |
| 30<br>31<br>32             | Regardless of the temperatures of patients before leaving the ward, they should be warmed using active warming method once in the theatre         | T*  | 256 | 62   | 157 | 38   |
| 33<br>34<br>35             | The surgical patient should be well covered throughout surgery to conserve heat and only be exposed during surgical preparation.                  | T*  | 310 | 75.1 | 103 | 24.9 |
| 36<br>37<br>38             | During the post-operative period, hypothermic patients should be warmed using AWM until they become warm before transferring them to the ward.    | T*  | 348 | 84.3 | 65  | 15.7 |
| 39<br>40<br>41             | Patients should be provided with at least 1 cotton sheet, 2 blankets, or a duvet during the postoperative phase                                   | T*  | 319 | 77.2 | 94  | 22.8 |
| 42<br>43<br>44             | Whiles in the OR, the patients' temperature should be measured every 15 minutes and every 30 minutes while in the RR.                             | F** | 83  | 20.1 | 330 | 79.9 |
| 45<br>46<br>47<br>48       | The temperature of post-operative patients should be recorded on arrival in the ward and be documented as part of a routine 4 hrs observations.   | T*  | 337 | 81.6 | 76  | 18.4 |

257 T\*-True statement, F\*\*- False statement, N- Number of participants.

## 258 Practice of nurses on hypothermia prevention

259 The overall median practice score of the study participants on perioperative hypothermia  
260 prevention was 18 with an IQR of (14, 21). In this study, 208 (50.4%) with 95% CI: (45.5, 55) of

the participants had a good practice. Among practice assessment questions, 258(62.5%) of the respondents they measure temperature as soon as patient arrival and 224(54.2 %) of the respondents were always assessing the sign and symptoms of hypothermia. Nearly half of the respondents 214(51.8%) and 213(51.6%) were sometimes maintaining ambient room temperature according to guidelines and also applying warm intravenous, blood products, and irrigation fluids respectively. Among 413 participants, 185(44.8%) of the respondents were reported never using forced-air warming devices, warm water circulating devices, and conductive devices for warming surgical patients (Table 3).

Table 3. Nurse's responses on the practice of perioperative hypothermia prevention in Northwest Amhara Regional State Referral Hospitals, Northwest, Ethiopia (N=413)

| Hypothermia prevention practices                                                                                                | Never |      | Some times |      | Always |      |
|---------------------------------------------------------------------------------------------------------------------------------|-------|------|------------|------|--------|------|
|                                                                                                                                 | N     | %    | N          | %    | N      | %    |
| Do you measure temperature as soon as patient arrival?                                                                          | 21    | 5.1  | 134        | 32.4 | 258    | 62.5 |
| Do you measure temperature regularly according to guidelines?                                                                   | 50    | 12.1 | 202        | 48.9 | 161    | 39   |
| Do you warm intravenous, blood products, and irrigation fluids using warming devices before administering to patients?          | 112   | 27.1 | 213        | 51.6 | 88     | 21.3 |
| Do you cover the mattress plastic sheet with dry linen before patient admission?                                                | 59    | 14.3 | 200        | 48.4 | 154    | 37.3 |
| Do you use forced-air warming devices, warm water circulating devices, and conductive devices for warming patients?             | 185   | 44.8 | 170        | 41.2 | 58     | 14   |
| Do you communicate your assessment findings on factors that could lead to hypothermia to all members of the perioperative team? | 57    | 13.8 | 160        | 38.7 | 196    | 47.5 |
| Do you advise patients to inform you when they feel cold during their hospitalization?                                          | 53    | 12.8 | 195        | 47.2 | 165    | 40   |

|                                                                                                                     |     |      |     |      |     |      |
|---------------------------------------------------------------------------------------------------------------------|-----|------|-----|------|-----|------|
| Do you develop and implement care plans for perioperative hypothermia prevention?                                   | 73  | 17.7 | 217 | 52.5 | 123 | 29.8 |
| Do you document the site for temperature measurement in the patients' file?                                         | 63  | 15.3 | 156 | 37.8 | 194 | 47   |
| Do you maintain ambient room temperature according to the guideline?                                                | 110 | 26.6 | 214 | 51.8 | 89  | 21.5 |
| Do you assess patients for their risk for perioperative hypothermia?                                                | 41  | 9.9  | 202 | 48.9 | 170 | 41.2 |
| Do you assess for signs and symptoms of hypothermia?                                                                | 30  | 7.3  | 159 | 38.5 | 224 | 54.2 |
| Do you advise patients to stay warm prior to surgery?                                                               | 48  | 11.6 | 185 | 44.8 | 180 | 43.6 |
| Do you include thermoregulation interventions and patient-related care to thermoregulation in your hand-over report | 41  | 9.9  | 194 | 47   | 178 | 43.1 |

### 271 **Factors associated with the level of knowledge on hypothermia prevention**

272 In the binary logistic regression, ten from fifteen variables were found to have a significant  
 273 association with participants' level of knowledge on hypothermia at a p-value of < 0.2. However,  
 274 after adjusting for the effects of potentially confounding variables using multivariate logistic  
 275 regression, only gender, educational status, and training were found to be significant predictors  
 276 of knowledge about how to prevent hypothermia.

277 In this study, being male had 1.61 times more knowledge [AOR = 1.61, 95% CI (1.02-2.53)].  
 278 Study participants who had an educational level of degree and masters were 2.5 and 4.39 times  
 279 more likely to have good knowledge [AOR = 2.50; 95% CI (1.25-5.00), 4.39; (1.45-13.20)]  
 280 respectively. In this study also nurses who took training on perioperative hypothermia prevention  
 281 had 3.68 times more knowledge [AOR = 3.68; 95% CI (2.14-6.33)] (Table 4).

282 Table 4- Bi-variable and multivariable analysis of factors associated with knowledge of nurses  
 283 on perioperative hypothermia prevention in Amhara Region Referral Hospitals, Northwest  
 284 Ethiopia.

| Variable            | Knowledge of nurses |      | COR (95%CI)     | P-value | AOR (95% CI)    | P-value |
|---------------------|---------------------|------|-----------------|---------|-----------------|---------|
|                     | Good                | Poor |                 |         |                 |         |
| Sex                 |                     |      |                 |         |                 |         |
| Female              | 105                 | 95   | 1               |         | 1               |         |
| Male                | 139                 | 74   | 1.69(1.14-2.52) | .009    | 1.61(1.02-2.53) | .038**  |
| Educational status  |                     |      |                 |         |                 |         |
| Diploma             | 19                  | 40   | 1               |         | 1               |         |
| Degree              | 191                 | 120  | 3.35(1.85-6.05) | .000    | 2.50(1.25-5.00) | .010**  |
| Master              | 34                  | 9    | 7.95(3.18-19.8) | .000    | 4.39(1.45-13.2) | .008**  |
| Hospital            |                     |      |                 |         |                 |         |
| FHRH                | 67                  | 59   | 1               |         | 1               |         |
| UoGCSRH             | 48                  | 35   | 1.20(.69-2.11)  | .314    | 1.18(.631-2.21) | .601    |
| DMCRH               | 51                  | 22   | 2.04(1.11-3.76) | .056    | 1.74(.863-3.49) | .118    |
| DTCRH               | 33                  | 14   | 2.08(1.01-4.25) | .046    | 2.16(.933-4.94) | .068    |
| TGSRH               | 45                  | 39   | 1.01(.58-1.77)  | .955    | 1.20(.627-2.29) | .581    |
| Ward                |                     |      |                 |         |                 |         |
| Emergency           | 52                  | 51   | 1               |         | 1               |         |
| Recovery            | 31                  | 8    | 3.8(1.59-9.05)  | .003    | 2.24(.862-5.84) | .098    |
| ICU                 | 34                  | 19   | 1.75(.88-3.46)  | .106    | 1.48(.696-3.16) | .307    |
| OR                  | 67                  | 35   | 1.87(1.07-3.29) | .028    | 1.51(.799-2.86) | .203    |
| Orthopedics         | 26                  | 20   | 1.27(.63-2.56)  | .496    | 1.35(.641-3.02) | .402    |
| Surgical            | 34                  | 36   | .92(.50-1.70)   | .805    | .850(.431-1.67) | .640    |
| Monthly salary(ETB) |                     |      |                 |         |                 |         |

|                                 |     |     |                 |      |                  |        |
|---------------------------------|-----|-----|-----------------|------|------------------|--------|
| ≤ 5000                          | 18  | 21  | 1               |      | 1                |        |
| 5001-7000                       | 90  | 74  | 1.41(.7-2.85)   | .477 | 1.10 (.478-2.35) | .885   |
| 7001-9000                       | 107 | 64  | 1.95(.96-3.93)  | .075 | .848(.492-2.49)  | .802   |
| ≥ 9001                          | 29  | 10  | 3.38(1.3-8.79)  | .010 | 1.53(.507-4.67)  | .447   |
| <b>Having guideline</b>         |     |     |                 |      |                  |        |
| No                              | 124 | 168 | 1               |      | 1                |        |
| Yes                             | 75  | 46  | 1.37(.88-2.1)   | .153 | .848(.490-1.46)  | .555   |
| <b>Took Training</b>            |     |     |                 |      |                  |        |
| No                              | 128 | 140 | 1               |      | 1                |        |
| Yes                             | 116 | 29  | 4.37(2.72-7.01) | .000 | 3.68(2.14-6.33)  | .000** |
| <b>Reading updated evidence</b> |     |     |                 |      |                  |        |
| No                              | 106 | 100 | 1               |      | 1                |        |
| Yes                             | 138 | 69  | 1.88(1.26-2.80) | .002 | 1.32(.834-2.10)  | .234   |
| <b>Shortage of thermometer</b>  |     |     |                 |      |                  |        |
| Yes                             | 148 | 120 | 1               |      | 1                |        |
| No                              | 96  | 49  | 1.58(1.04-2.41) | .031 | 1.27(.776-2.08)  | .325   |
| <b>Job satisfaction</b>         |     |     |                 |      |                  |        |
| Unsatisfied                     | 100 | 95  | 1               |      | 1                |        |
| Satisfied                       | 144 | 74  | 1.84(1.24-2.74) | .002 | 1.38(.873-2.20)  | .166   |

285 Variables which show significant association during multivariable logistic regression at \*\*p-  
 286 value <0.05, Hosmer and Lemeshow test P=.856, 1=Reference.

### 287 **Factors associated with the level of practice on hypothermia prevention**

288 In bivariate logistic regression analysis, eleven from sixteen variables were found to have  
 289 significant predictors at a p-value < 0.2. But after controlling for the effects of potentially  
 290 confounding variables using multivariate logistic regression only nurses working ward, took



291 training, job satisfaction, and knowledge of nurses were found to be significant predictors for the  
 292 practice of nurses on hypothermia prevention at ( $P < 0.05$ ).

293 Nurses who were working in recovery and intensive care units were 2.87 and 2.39 times more  
 294 likely to have good practice [AOR = 2.87; 95% CI (1.08-7.58), and 2.39; 95% CI (1.09-5.22)]  
 295 respectively. Nurses who took training in hypothermia prevention were 2.64 times more likely to  
 296 have good practices for hypothermia prevention [AOR = 2.64; 95% CI (1.53-4.57)]. In this study,  
 297 also nurses who are satisfied with their job were 2.15 times higher to have a good level of  
 298 practice [AOR 2.15; 95% CI (1.34-3.43)]. The other significant variable is nurses who had  
 299 knowledge of hypothermia were 2.64 times higher to have a good level of practice [AOR 2.64;  
 300 95% CI (1.63-4.27)] (Table 5)

301 Table 5- Bi-variable and multivariable analysis of factors associated with the practice of nurses  
 302 on perioperative hypothermia prevention in Amhara Region Referral Hospitals, Northwest  
 303 Ethiopia.

| Variable           | Practice of nurses |      | COR (95%CI)     | P-value | AOR (95% CI)    | P-value |
|--------------------|--------------------|------|-----------------|---------|-----------------|---------|
|                    | Good               | Poor |                 |         |                 |         |
| Educational status |                    |      |                 |         |                 |         |
| Diploma            | 16                 | 43   | 1               |         | 1               |         |
| Degree             | 159                | 152  | 2.81(1.51-5.20) | .000    | 1.94(.902-4.20) | .089    |
| Master             | 24                 | 19   | 3.39(1.47-7.79) | .002    | 1.28(.411-4.00) | .669    |
| Working ward       |                    |      |                 |         |                 |         |
| Emergency          | 41                 | 62   | 1               |         | 1               |         |
| Recovery           | 30                 | 9    | 5.04(2.1-11.71) | .000    | 2.87(1.08-7.58) | .033**  |
| ICU                | 34                 | 19   | 2.70(1.36-5.37) | .004    | 2.39(1.09-5.22) | .029**  |
| OR                 | 59                 | 43   | 2.07(1.18-3.62) | .010    | 1.63(.856-3.12) | .136    |
| Orthopedics        | 20                 | 26   | 1.16(.575-2.35) | .674    | 1.17(.527-2.62) | .693    |

|                              |     |     |                 |      |                 |        |
|------------------------------|-----|-----|-----------------|------|-----------------|--------|
| Surgical                     | 24  | 46  | .78(.419-1.48)  | .467 | .657(.321-1.34) | .250   |
| Work experience              |     |     |                 |      |                 |        |
| ≤ 5 years                    | 69  | 88  | 1               |      | 1               |        |
| 6-10                         | 95  | 86  | 1.4(.917-2.16)  | .118 | 1.26(.713-2.23) | .424   |
| 11-15                        | 32  | 25  | 1.63(.886-3.00) | .116 | 1.68(.735-3.86) | .217   |
| ≥ 16                         | 12  | 6   | 2.55(.911-7.14) | .075 | 3.26(.85-12.44) | .083   |
| Monthly salary(ETB)          |     |     |                 |      |                 |        |
| ≤ 5000                       | 17  | 25  | 1               |      | 1               |        |
| 5001-7000                    | 67  | 91  | 1.08(.542-2.16) | .822 | 1.01(.436-2.35) | .976   |
| 7001-9000                    | 98  | 74  | 1.94(.987-3.86) | .057 | 1.26(.517-3.10) | .604   |
| ≥ 9001                       | 26  | 15  | 2.54(1.05-6.17) | .038 | 1.05(.310-3.58) | .933   |
| Having guideline/ protocol   |     |     |                 |      |                 |        |
| No                           | 131 | 161 | 1               |      | 1               |        |
| Yes                          | 77  | 44  | 2.15(1.39-3.32) | .001 | 1.42(.824-2.47) | .205   |
| Took training                |     |     |                 |      |                 |        |
| No                           | 104 | 164 | 1               |      | 1               |        |
| Yes                          | 104 | 41  | 4.00(2.58-6.19) | .000 | 2.64(1.53-4.57) | .001** |
| Reading updated evidence     |     |     |                 |      |                 |        |
| No                           | 84  | 122 | 1               |      | 1               |        |
| Yes                          | 124 | 83  | 2.17(1.46-3.21) | .000 | 1.37(.853-2.21) | .192   |
| Constraint of thermometer    |     |     |                 |      |                 |        |
| Yes                          | 123 | 145 | 1.67(1.11-2.51) | .014 | 1.10(.661-1.83) | .711   |
| No                           | 85  | 60  | 1               |      | 1               |        |
| Shortage of warming material |     |     |                 |      |                 |        |

|                  |     |     |                 |      |                 |        |
|------------------|-----|-----|-----------------|------|-----------------|--------|
| Yes              | 166 | 176 | 1.53(.914-2.57) | .105 | 1.77(.923-3.39) | .086   |
| No               | 42  | 29  | 1               |      | 1               |        |
| Job satisfaction |     |     |                 |      |                 |        |
| Unsatisfied      | 71  | 124 | 1               |      | 1               |        |
| Satisfied        | 137 | 81  | 2.95(1.97-4.41) | .000 | 2.15(1.34-3.43) | .001** |
| Knowledge        |     |     |                 |      |                 |        |
| Good             | 157 | 87  | 4.17(2.74-6.35) | .000 | 2.64(1.63-4.27) | .000** |
| Poor             | 51  | 118 | 1               |      | 1               |        |

304 Variables which show significant association during multivariable logistic regression at\*\* p-  
 305 value <0.05, Hosmer and Lemeshow test P=.993, 1=Reference.

### 306 Discussion

307 The result of this study showed that the overall knowledge of nurses on perioperative  
 308 hypothermia prevention was 59.1% with 95% CI (54.7, 63.7). This finding is higher than  
 309 previous studies conducted Addis Ababa, Ethiopia(52.1%) (13). The possible reason might be  
 310 due to socio-demographic differences, in the previous study most participants were having a  
 311 degree and diploma level of educational status and the study area was a single setting of trauma  
 312 center while in the current study greater than 10% of the participant had masters and study  
 313 setting were multicenter. The other reason might be due to the difference in the time of the study  
 314 because of the advancement of technology including updated evidence; educational programs  
 315 were increased when the time is more and more recent. So, the participant might have to get  
 316 more information regarding the topics. But this finding is much lower than those of studies  
 317 conducted in Gambia (82%) (11), Turkey(77.5%) (4), Brazil (81.5%) (12), University of Iowa  
 318 Hospitals and Clinics, America (71%) (35), Maryland, America (100%) (36), Ireland (37), and  
 319 also as compare to NICE, AORN, and ASPAN guidelines of perioperative hypothermia  
 320 prevention (3, 15, 38). The possible justification for this difference might be due to the level of  
 321 staff training, adopted recommended guidelines, socioeconomic status, and sample size.  
 322 According to training on hypothermia prevention in this study, only a few nurses (35.1%) have  
 323 been trained while in the comparison group except in Gambia, almost all participants were taking

1  
2  
3 324 training on perioperative hypothermia prevention. In terms of using guideline/protocol, the  
4  
5 325 studies conducted in America participants always used recommended guidelines and protocols  
6  
7 326 while in this study only 29.3% of nurses were report having guidelines/protocols. According to  
8  
9 327 difference in socioeconomic status of the participants as well as study setting, we Ethiopians are  
10  
11 328 under a low-income country compared to America, Brazil, and Ireland. This is indirectly affects  
12  
13 329 the quality of healthcare education as well as healthcare setting. In terms of sample size in the  
14  
15 330 present study has a larger sample size (n=413) as compare to all listed above (in Gambia (n=53),  
16  
17 331 Turkey (n=200), Brazil (n=21), University of Iowa Hospitals and Clinics, America n=30,  
18  
19 332 Maryland, America n=19, Ireland n=198).

20 333 In this study, the overall practice of nurses on perioperative hypothermia prevention was 50.4%  
21  
22 334 with 95%, CI (45.5-55). This is consistent with the studies done in Addis Ababa, Ethiopia  
23  
24 335 (52.5%)(13), and Durban, South Africa (46%) (14). But this study is higher than the study done  
25  
26 336 in Gambia (19%) (11). The possible reason might be the difference in socio-demographic  
27  
28 337 characteristics like most of the participants in the Gambia were have less than five years'  
29  
30 338 experience, and hadn't masters holder participants. On the other hand, the result of this study is  
31  
32 339 much lower when from NICE, AORN, and ASPAN recommendations guidelines (3,15, 38). This  
33  
34 340 discrepancy could be due to the insufficient availability of warming material, measurement  
35  
36 341 material, and guidelines or protocol or it might be also an inadequate opportunity for frequent  
37  
38 342 training for nurses.

39 343 Regarding the determinants of the level of knowledge on hypothermia prevention, this study has  
40  
41 344 found out that male nurses were found to have more knowledge with hypothermia prevention  
42  
43 345 by 1.6 times as compared to females. The reason might be females have an extra workload, most  
44  
45 346 home activities such as bearing and taking care of children, cooking, washing etc. are mostly  
46  
47 347 done by females (39). So due to being overloaded by other additional home activities they might  
48  
49 348 haven't enough time to scale up their knowledge.

50 349 Nurses who had degrees and masters were more likely to have good knowledge with  
51  
52 350 hypothermia prevention by 2.5 and 4.4 times respectively as compared to those who had a  
53  
54 351 diploma. This finding is supported by studies conducted in Iran(24), and Brazil, educational  
55  
56 352 interventions are fundamental for nurses to guide their team and be the link of technical-

1  
2  
3 353 scientific knowledge to improve the quality of patient care (12). The possible reason might be  
4  
5 354 that more educated respondents have a higher opportunity of exposure to different courses  
6  
7 355 directly or indirectly related to the prevention of hypothermia.

8  
9 356 Those nurses who received training related to hypothermia prevention were 3.7 and 2.6 times  
10  
11 357 more likely to have good knowledge and practice of hypothermia prevention as compared to  
12  
13 358 counterparts. This finding is supported by studies in Maryland, America(36), Brazil (40), Iran  
14  
15 359 (24), Turkey(4). The possible reason might be because training plays an important role in  
16  
17 360 improving the quality of patient care. The need to promote the effectiveness of in-site and off-  
18  
19 361 site training of nurses is an invaluable criterion. Training is necessary to update theoretical and  
20  
21 362 practical knowledge in every aspect of nursing education(39).

22 363 Another finding is nurses who were working in recovery and intensive care units were 2.9 and  
23  
24 364 2.4 times more likely to have good practice respectively as compared to the nurses who were  
25  
26 365 working in the emergency ward. This finding is inconsistent with the study conducted in Turkey,  
27  
28 366 ICU nurses had more knowledge than nurses who were working in other wards but their practice  
29  
30 367 was not changing (4). The possible reason why Recovery and ICU nurses had better practice  
31  
32 368 might be patients admitted in Recovery and ICU wards need close follow-up because of their  
33  
34 369 physiological change/disturbance due to surgery or anesthesia effect. So working in two wards,  
35  
36 370 the nurses perform more activities, which maintain thermoregulation. Another reason might be  
37  
38 371 nurse to patient ratio is better than other wards, the standard is in recovery one to two, ICU one  
39  
40 372 to one, emergency one to three, and for surgical and orthopedics wards is one to six in Ethiopia.  
41  
42 373 The other reason might have better availability of resources like a thermometer, warming  
43  
44 374 materials. And also might be most nurses who were working in those two wards took more  
45  
46 375 training than other nurses.

47  
48 376 In this study, also nurses who are satisfied with their job were 2.2 times more likely to have a  
49  
50 377 good level of practice as compared to those who were not satisfied. Job satisfaction of the nurses  
51  
52 378 is highly important in building up employee interest and efficiency, as higher job satisfaction  
53  
54 379 determines better employee performance(41). Therefore, hospital administrators need to work on  
55  
56 380 improving working environments, so that nurses become safe and comfortable to result in a  
57  
58 381 positive feeling towards their job.

1  
2  
3 382 The other significant variable is nurses who had knowledge of hypothermia were 2.6 times more  
4  
5 383 likely to have a good practice as compared to those who hadn't knowledge of hypothermia  
6  
7 384 prevention. This study has supported studies conducted at the University of Calabar, Nigeria (42)  
8  
9 385 and Textbook of Brunner & Suddarth (43), AORN, surgical team awareness, education, and  
10  
11 386 understanding of the effects of hypothermia are necessary components to change how clinicians  
12  
13 387 provide quality, cost-effective patient care (44).

### 14 388 **Strength and Limitations of the study**

15  
16 389 A self-reported questionnaire measure of knowledge and practice of nurses on the prevention of  
17  
18 390 perioperative hypothermia is prone to social desirability bias and recall bias. Furthermore, this  
19  
20 391 study was not triangulated with a qualitative method. Despite these limitations, this study covers  
21  
22 392 large setting (multicenter) area.

### 23 24 393 **Conclusion**

25  
26 394 This study revealed that nurses' knowledge and practice regarding the prevention of perioperative  
27  
28 395 hypothermia was found to be inadequate as compared to the recommended guidelines. Having  
29  
30 396 higher educational status, being male and attending training showed a positive and significant  
31  
32 397 association with good knowledge of perioperative hypothermia prevention. Whereas, factors  
33  
34 398 contributing to practice were working ward, training, job satisfaction, and knowledge of nurses.  
35  
36 399 Based on the findings of the study, we recommend to Amhara regional health bureau and  
37  
38 400 hospital administrators including ward coordinators in collaboration with other stakeholders:  
39  
40 401 Improve sponsored educational opportunities especially those nurses who have a diploma,  
41  
42 402 promote and strengthen in-service training periodically and regularly, better to motivate those  
43  
44 403 who have the knowledge and practiced well, should fulfill the availability of resources like  
45  
46 404 warming materials, thermometers, and updated guidelines/protocols, better to improve working  
47  
48 405 environments so that nurses become safe and comfortable to result in a positive feeling towards  
49  
50 406 their job. Researchers also should do other research for a strong recommendation by adding  
51  
52 407 observational data collection methods.

### 53 54 55 56 57 58 59 60 408 **List of Abbreviation**

1  
2  
3 409 AOR: Adjusted Odd Ratio; AORN: Association of perioperative Register Nurses; ASPAN:  
4  
5 410 American Society of PeriAnesthesia Nurses; CI: Confidence Interval; DMRH: Debre Markos  
6  
7 411 Referral Hospital; DTCRH: Debre Tabor Comprehensive Referral Hospital; EMS: Emergency  
8  
9 412 Medical Service; EPI INFO: Statistical Package for Epidemiological Information Analysis;  
10  
11 413 FHRH: Felege Hiwot Referral Hospital; ICU: Intensive Care Unit; IPH: Inadvertent  
12  
13 414 Perioperative Hypothermia; OR: Odds Ratio; OR: Operation Room; HP: Perioperative  
14  
15 415 Hypothermia; PI: Principal Investigator; RR: Recovery Room; SPSS: Statistical Package of  
16  
17 416 Social Science; T° c: Temperature In Degree Centigrade; TGSRH: Tibebe Gion Specialized  
18  
19 417 Referral Hospital; UK: United Kingdom; UoGCSRH: University of Gondar Comprehensive  
20  
21 418 Specialized Referral Hospital; USA: United States of America  
22  
23  
24  
25

#### 26 419 **Declaration**

#### 28 420 **Ethical Approval and informed consent to participate**

29  
30 421 The Institutional Ethical Review Board of the University of Gondar approved the study. Ethical  
31  
32 422 clearance was obtained from the board on behalf of the School of Nursing (Ref.  
33  
34 423 No. S/R/164/2/2021). Upon this clearance, additional written permission to conduct the study  
35  
36 424 was obtained from the manager of all five referral hospitals when after explaining the purpose,  
37  
38 425 the possible benefit of the study. Informed written consent was obtained from each respondent  
39  
40 426 before fulfilling the questionnaire. It was explained for the respondents that participated in the  
41  
42 427 study were voluntary and private information would be protected. The processes no identify  
43  
44 428 respondents by their name so; the process was done by keeping the privacy of the respondents.

#### 44 429 **Consent to publish**

45 430 Not applicable

#### 47 431 **Availability of data and materials:**

48  
49 432 All data relevant to the study are included in the article or uploaded as supplementary  
50  
51 433 information

#### 52 434 **Conflicts of Interest**

53  
54 435 The authors declare that they have no conflicts of interest.  
55  
56

1  
2  
3 436 **Funding**  
4

5  
6 437 No funder  
7

8 438 **Authors' contributions**  
9

10  
11 439 Ashenafi Worku carried out the study starting from designing the study, analyzing, interpreting  
12 440 data, and reviewing the manuscript. Bezenaw Yimer Mekkonen, Netsanet Tsegaye, and  
13 441 Endalkachew Dellie participated in proposal writing, data analysis, interpretation, and  
14 442 commenting drafts of the paper and manuscript. All authors involved in writing, review and  
15 443 approving the final draft of the manuscript. All authors read and approved the manuscript before  
16 444 submitted to the journal for publication.  
17  
18  
19  
20

21  
22 445 **Acknowledgment**  
23

24 446 We would like to thank the University of Gondar, College of Medicine and Health Sciences,  
25 447 School of Nursing, for making this thesis work by giving ethical clearance, and assigning  
26 448 advisors. We forward our appreciation to the five hospital administrators for allowing us to  
27 449 conduct this research and their cooperation. Finally, we would like to thank study participants for  
28 450 their volunteer participation, and data collectors and supervisors for their valuable support and  
29 451 cooperation during data collection.  
30  
31  
32  
33  
34

35 452 **Reference**  
36

- 37 453 1. Osilla EV, Marsidi JL, Sharma S. Physiology, Temperature Regulation: StatPearls  
38 454 Publishing, Treasure Island (FL); 2020 2020.  
39  
40 455 2. Giuliano KK, Hendricks J. Inadvertent perioperative hypothermia: current nursing  
41 456 knowledge. AORN journal. 2017;105(5):453-63.  
42  
43 457 3. NICE. National Institute for Health and Care Excellence Guideline  
44 458 <https://pathways.nice.org.uk/pathways/inadvertent-perioperative-hypothermia.2020>.  
45  
46 459 4. Senol T, Yildiz T. Effects of a training programme on the awareness of inadvertent  
47 460 perioperative hypothermia among surgical nurses. Current Health Studies. 2019:27.  
48  
49 461 5. Mendonça FT, Ferreira JdS, Guilardi VHF, Guimarães GMN. Prevalence of inadvertent  
50 462 perioperative hypothermia and associated factors: a cross-sectional study. Therapeutic  
51 463 Hypothermia and Temperature Management. 2021;11(4):208-15.  
52  
53  
54  
55  
56  
57  
58  
59  
60



- 464 6. Mehta OH, Barclay KL. Perioperative hypothermia in patients undergoing major  
465 colorectal surgery. *ANZ journal of surgery*. 2014;84(7-8):550-5.
- 466 7. Sari S, Aksoy SM, But A. The incidence of inadvertent perioperative hypothermia in  
467 patients undergoing general anesthesia and an examination of risk factors. *International journal*  
468 *of clinical practice*. 2021;75(6):e14103.
- 469 8. Sagiroglu G, Ozturk GA, Baysal A, Turan FN. Inadvertent perioperative hypothermia  
470 and important risk factors during major abdominal surgeries. *J Coll Physicians Surg Pak*.  
471 2020;30(2):123-8.
- 472 9. Fekede MS, Sahile WA. Research Article Magnitude and associated factors of  
473 Perioperative hypothermia in patients who underwent Elective surgery at Tikur Anbessa  
474 Specialized Hospital, Addis Ababa, Ethiopia. 2019.
- 475 10. Denu ZA, Semple P, Tawuye HY, Kassa AA. Perioperative Hypothermia and Predictors  
476 of Intra-Operative Hypothermia among Patients Operated at Gondar university Hospital from  
477 March to April 2015. 2015.
- 478 11. Jallow O. Nurses awareness and practice of perioperative hypothermia prevention 2020.
- 479 12. de Souza A PS, Montezello D, . Knowledge of surgical center nursing professionals on  
480 hypothermia in surgical oncology patients. *Rev Sobecc*. 2017;22(4):188-92.
- 481 13. TIGIST G. knowledge, practice and associated factors on hypothermia prevention of  
482 Nurses among <http://etd.aau.edu.et/handle/123456789/21258>. 2019.
- 483 14. Nel MJ, Hardcastle TC. Preventative measures taken against hypothermia in selected  
484 Durban hospitals' emergency centres and operating theatres. *African journal of emergency*  
485 *medicine : Revue africaine de la medecine d'urgence*. 2017 Dec;7(4):172-6. PubMed PMID:  
486 30456134. Pubmed Central PMCID: PMC6234136. Epub 2018/11/21. eng.
- 487 15. Bashaw MA. Guideline Implementation: Preventing Hypothermia. *AORN Journal*. 2016  
488 2016/03/01;103(3):304-13.
- 489 16. Torossian A, Bräuer A, Höcker J, Bein B, Wulf H, Horn E-P. Preventing inadvertent  
490 perioperative hypothermia. *Deutsches Arzteblatt international*. 2015;112(10):166-72. PubMed  
491 PMID: 25837741. eng.
- 492 17. Putnam K. Prevention of unplanned patient hypothermia. *AORN journal*.  
493 2015;102(4):P11-P2.

- 1  
2  
3 494 18. Cohen S, Hayes JS, Tordella T, Puente I. Thermal efficiency of prewarmed cotton,  
4 495 reflective, and forced—warm-air inflatable blankets in trauma patients. *International Journal of*  
5 496 *Trauma Nursing*. 2002;8(1):4-8.
- 8 497 19. Mooney B. Prevention of perioperative hypothermia.
- 10 498 20. Geiger TM, Horst S, Muldoon R, Wise PE, Enrenfeld J, Poulouse B, et al. Perioperative  
11 499 core body temperatures effect on outcome after colorectal resections. *The American Surgeon*.  
12 500 2012;78(5):607-12.
- 15 501 21. Burns SM, Wojnakowski M, Piotrowski K, Caraffa G. Unintentional hypothermia:  
16 502 implications for perianesthesia nurses. *Journal of PeriAnesthesia Nursing*. 2009;24(3):167-76.
- 18 503 22. Wagner DV. Unplanned perioperative hypothermia. *Aorn j*. 2006 Feb;83(2):470, 3-6.  
19 504 PubMed PMID: 16544863. Epub 2006/03/21. eng.
- 22 505 23. Billeter AT, Hohmann SF, Druen D, Cannon R, Polk Jr HC. Unintentional perioperative  
23 506 hypothermia is associated with severe complications and high mortality in elective operations.  
24 507 *Surgery*. 2014;156(5):1245-52.
- 27 508 24. Pourrezaei S, Dinmohammadi M, Jafarirouhi A. The Effect of Thermal Care Workshop  
28 509 on EMS Staff Readiness in managing Accidental Hypothermia in Trauma Patients. *Preventive*  
29 510 *Care in Nursing and Midwifery Journal*. 2018;8(2):26-33.
- 32 511 25. Evans J, Kenkre J. Current practice and knowledge of nurses regarding patient  
33 512 temperature measurement. *Journal of medical engineering & technology*. 2006;30(4):218-23.
- 36 513 26. Bayleyegn B, Mehari A, Damtie D, Negash M. Knowledge, Attitude and Practice on  
37 514 Hospital-Acquired Infection Prevention and Associated Factors Among Healthcare Workers at  
38 515 University of Gondar Comprehensive Specialized Hospital, Northwest Ethiopia. *Infection and*  
39 516 *Drug Resistance*. 2021;14:259.
- 43 517 27. Yalew ZM, Zeleke H, Afenigus AD, Yitayew YA, Minuye B, Kassahun SA. Patient  
44 518 Experience in Nursing Care and Associated Factors Among Adult Admitted Patients in Debre  
45 519 Markos and Dessie Referral Hospitals, Amhara Region, Ethiopia, 2019. *Journal of Patient*  
46 520 *Experience*. 2020:2374373520966817.
- 49 521 28. Engidaw MT, Gebremariam AD, Tiruneh SA, Asnakew DT, Abate BA. Chronic energy  
50 522 deficiency and its associated factors among lactating women in Debre Tabor general hospital,  
51 523 Northcentral Ethiopia. *Journal of Family Medicine and Health Care*. 2019;5(1):1-7.

- 1  
2  
3 524 29. Ayalew E, Workineh Y. Nurses' intention to leave their job and associated factors in  
4 525 Bahir Dar, Amhara Region, Ethiopia, 2017. BMC nursing. 2020;19:1-7.
- 6 526 30. Tarekegn F, Asfaw G, Mossie M. Perioperative mortality at Tibebe Ghion Specialized  
7 527 Teaching Hospital, Ethiopia: A longitudinal study design. International Journal of Surgery Open.  
8 528 2020;26:81-5.
- 11 529 31. Ireland S, Murdoch K, Ormrod P, Saliba E, Endacott R, Fitzgerald M, et al. Nursing and  
13 530 medical staff knowledge regarding the monitoring and management of accidental or exposure  
14 531 hypothermia in adult major trauma patients. International journal of nursing practice.  
15 532 2006;12(6):308-18.
- 18 533 32. Harper CM. Clinical Approaches to the Prevention of Inadvertent Perioperative  
19 534 Hypothermia: University of Portsmouth; 2016.
- 22 535 33. Health Nif, Excellence. C. Hypothermia: prevention and management in adults having  
23 536 surgery. Clinical guideline [CG65]. 2016.
- 25 537 34. Ayalew F, Kibwana S, Shawula S, Misganaw E, Abosse Z, Van Roosmalen J, et al.  
26 538 Understanding job satisfaction and motivation among nurses in public health facilities of  
27 539 Ethiopia: a cross-sectional study. BMC nursing. 2019;18(1):1-13.
- 30 540 35. Block J, Lilienthal M, Cullen L, White A. Evidence-based thermoregulation for adult  
31 541 trauma patients. Critical care nursing quarterly. 2012;35(1):50-63.
- 34 542 36. Tamrakar P. Preventing Intraoperative and Postoperative Hypothermia. 2021.
- 36 543 37. Hegarty J, Walsh E, Burton A, Murphy S, O'gorman F, McPolin G. Nurses' knowledge of  
37 544 inadvertent hypothermia. Aorn Journal. 2009;89(4):701-13.
- 39 545 38. SELECTED WS. American Society of PeriAnesthesia Nurses Clinical guideline for the  
40 546 prevention of unplanned perioperative hypothermia [http://www.aspan.org/PDFfiles/HYPOTHERMIA\\_GUIDELINE10-02.pdf](http://www.aspan.org/PDFfiles/HYPOTHERMIA_GUIDELINE10-02.pdf) Centers for Disease Control and  
41 547 Prevention Guideline for prevention of surgical site infection, 1999 [http://www.cdc.gov/ncidod/dhqp/gl\\_surgicalsites.html](http://www.cdc.gov/ncidod/dhqp/gl_surgicalsites.html) Institute for Healthcare Improvement <http://www.ihc.org/IHI/Programs/CampaignSurgicalCareImprovementProject> <http://www.medqic.org/scip>.  
42 548 Last accessed on May. 2006;4.
- 45 549 39. Chaghari M, Saffari M, Ebadi A, Ameryoun A. Empowering education: A new model for  
46 550 in-service training of nursing staff. Journal of advances in medical education & professionalism.  
47 551 2017;5(1):26.
- 50 552  
51 553  
52 554

- 1  
2  
3 555 40. de Araujo Püschel VA. Knowledge of hypothermia in nursing professionals of surgical  
4 556 center. *Revista da Escola de Enfermagem da USP*. 2012;46(1):123-9.
- 5  
6 557 41. Geleto A, Baraki N, Atomsa GE, Dessie Y. Job satisfaction and associated factors among  
7 558 health care providers at public health institutions in Harari region, eastern Ethiopia: a cross-  
8  
9 559 sectional study. *BMC research notes*. 2015;8(1):1-7.
- 10  
11 560 42. Oyira EJ, Ella R, Chukwudi UE, Paulina AI. Knowledge Practice and Outcome of  
12 561 Quality Nursing Care among Nurses in University of Calabar Teaching Hospital (UCTH).  
13 562 *Journal of Education and Training Studies*. 2016;4(11):179-93.
- 14  
15 563 43. Hinkle JL, Cheever KH. Brunner and Suddarth's textbook of medical-surgical nursing:  
16 564 Wolters kluwer india Pvt Ltd; 2018.
- 17  
18 565 44. Link T. Guidelines in Practice: Hypothermia Prevention. . *AORN journal* 2020 Jun;  
19 566 ;111(6):653-66.
- 20  
21  
22  
23  
24 567  
25  
26  
27 568  
28  
29  
30 569  
31  
32 570  
33  
34  
35 571  
36  
37 572  
38  
39  
40 573  
41  
42 574  
43  
44  
45 575  
46  
47 576  
48  
49  
50 577  
51  
52 578  
53  
54  
55  
56  
57  
58  
59  
60

1  
2  
3 579 **Table legend:**  
4  
5

6 580 **Supplemental Table:** Institutional and other related factors of the respondents on perioperative  
7  
8 581 hypothermia prevention in Amhara Regional State Referral Hospitals, Northwest Ethiopia, 2021  
9  
10 582 (N=413).  
11

12 583 **Figure legend:**  
13

14 584 **Supplemental Figure:** Schematic presentation of sampling procedure of nurses' knowledge and  
15  
16 585 practice, and associated factors on hypothermia prevention among surgical patients.  
17

18 586  
19  
20  
21  
22  
23  
24  
25  
26  
27  
28  
29  
30  
31  
32  
33  
34  
35  
36  
37  
38  
39  
40  
41  
42  
43  
44  
45  
46  
47  
48  
49  
50  
51  
52  
53  
54  
55  
56  
57  
58  
59  
60

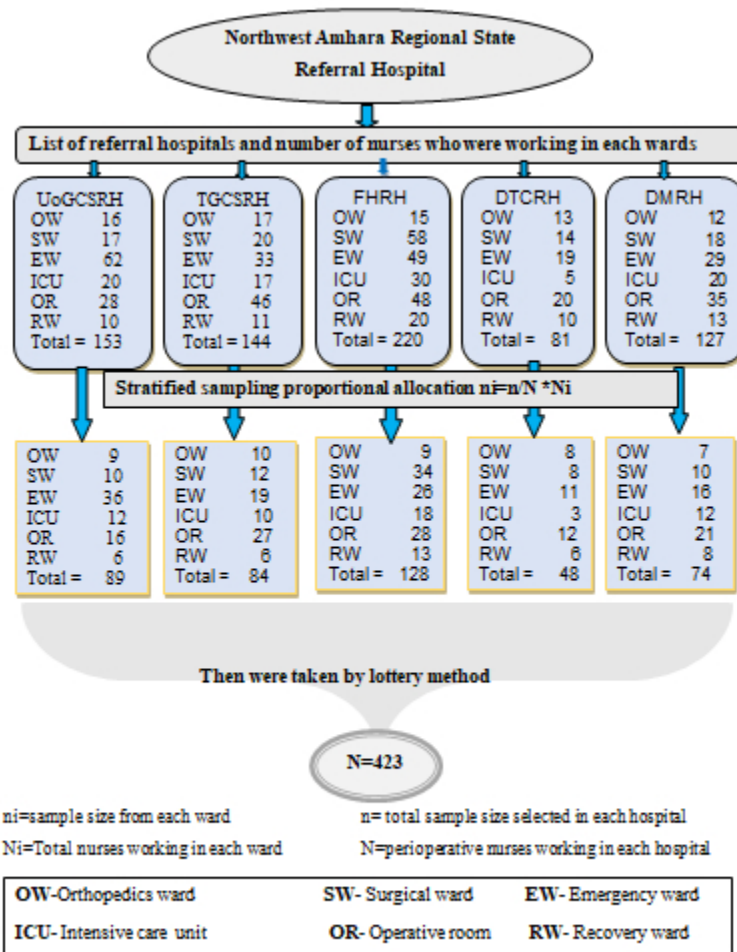

Supplemental Figure: Schematic presentation of sampling procedure of nurses' knowledge and practice, and associated factors on hypothermia prevention among surgical patients.

315x352mm (38 x 38 DPI)

Supplemental Table: Institutional and other related factors of the respondents on perioperative hypothermia prevention in Amhara Regional State Referral Hospitals, Northwest Ethiopia, 2021 (N=413).

| Variable                                           | Response         | Frequency (N=413) | Percentage (%) |
|----------------------------------------------------|------------------|-------------------|----------------|
| Working place (hospital)                           | TGSRH            | 84                | 20.3           |
|                                                    | UoGCSRH          | 83                | 20.1           |
|                                                    | DMCRH            | 73                | 17.7           |
|                                                    | DTCRH            | 47                | 11.4           |
|                                                    | FHRH             | 126               | 30.5           |
| Ward:                                              | Emergency        | 103               | 24.9           |
|                                                    | Recovery         | 39                | 9.4            |
|                                                    | OR               | 102               | 24.7           |
|                                                    | ICU              | 53                | 12.8           |
|                                                    | Orthopedics ward | 46                | 11.1           |
|                                                    | Surgical ward    | 70                | 16.9           |
| Daily working hours                                | ≤ 8 hrs.         | 354               | 85.7           |
|                                                    | ≥9 hrs.          | 59                | 14.3           |
| Training on hypothermia prevention                 | Yes              | 145               | 35.1           |
|                                                    | No               | 268               | 64.9           |
| Presence of protocol/guideline                     | Yes              | 121               | 29.3           |
|                                                    | No               | 292               | 70.7           |
| Reading updated evidence on hypothermia prevention | Yes              | 206               | 49.9           |
|                                                    | No               | 207               | 50.1           |

| Variable                        | Response     | Frequency (N=413) | Percentage (%) |
|---------------------------------|--------------|-------------------|----------------|
| Availability of thermometer     | Yes          | 145               | 35.1           |
|                                 | No           | 268               | 64.9           |
| Constraints of warming material | Yes          | 342               | 82.8           |
|                                 | No           | 71                | 17.2           |
| Shortage of blanket             | Yes          | 166               | 40.2           |
|                                 | No           | 247               | 59.8           |
| Shortage of linens              | Yes          | 89                | 21.5           |
|                                 | No           | 324               | 78.5           |
| Shortage of fluid warmer        | Yes          | 132               | 32.0           |
|                                 | No           | 281               | 68.0           |
| Shortage of air warmer/heater   | Yes          | 212               | 51.3           |
|                                 | No           | 201               | 48.7           |
| Shortage of warmer blanket      | Yes          | 217               | 52.5           |
|                                 | No           | 196               | 47.5           |
| Job satisfaction                | Satisfied    | 217               | 52.5           |
|                                 | Dissatisfied | 196               | 47.5           |



**STROBE Statement—checklist of items that should be included in reports of observational studies**

|                           | <b>Item No.</b> | <b>Recommendation</b>                                                                               | <b>Page No.</b> | <b>Relevant text from manuscript</b>                                                                                                                                                                                                             |
|---------------------------|-----------------|-----------------------------------------------------------------------------------------------------|-----------------|--------------------------------------------------------------------------------------------------------------------------------------------------------------------------------------------------------------------------------------------------|
| <b>Title and abstract</b> | 1               | (a) Indicate the study's design with a commonly used term in the title or the abstract              | 1               | Line (1-3); An institution-based cross-sectional study was conducted for the title of Knowledge and Practice of nurses regarding Perioperative Hypothermia Prevention at Northwest Amhara Regional State Referral Hospitals, Northwest Ethiopia: |
|                           |                 | (b) Provide in the abstract an informative and balanced summary of what was done and what was found | 2               | Lines (26 – 50); Abstract                                                                                                                                                                                                                        |
| <b>Introduction</b>       |                 |                                                                                                     |                 |                                                                                                                                                                                                                                                  |
| Background/rationale      | 2               | Explain the scientific background and rationale for the investigation being reported                | 3 and 4         | Lines (56 – 108); Introduction                                                                                                                                                                                                                   |
| Objectives                | 3               | State-specific objectives, including any pre-specified hypotheses                                   | 4               | Lines (106 – 108); This study aimed to assess nurses' knowledge, practice, and their determinant factors of perioperative hypothermia prevention in Northwest Amhara Regional State Referral Hospitals, Northwest Ethiopia.                      |
| <b>Methods</b>            |                 |                                                                                                     |                 |                                                                                                                                                                                                                                                  |
| Study design              | 4               | Present key elements of study design early in the paper                                             | 4               | Lines (110 – 112); Institutional based cross-sectional study was conducted in perioperative units/wards of five referral hospitals from March 25-May 20/2021.                                                                                    |
| Setting                   | 5               | Describe the setting, locations, and relevant dates,                                                | 5               | Lines (113 – 131); Study setting                                                                                                                                                                                                                 |

|                           |   |                                                                                                                                                                                                                                                                                                                                                                                                                                                              |            |                                                                                                                                                                                                                                                                                              |
|---------------------------|---|--------------------------------------------------------------------------------------------------------------------------------------------------------------------------------------------------------------------------------------------------------------------------------------------------------------------------------------------------------------------------------------------------------------------------------------------------------------|------------|----------------------------------------------------------------------------------------------------------------------------------------------------------------------------------------------------------------------------------------------------------------------------------------------|
|                           |   | including periods of recruitment, exposure, follow-up, and data collection                                                                                                                                                                                                                                                                                                                                                                                   |            |                                                                                                                                                                                                                                                                                              |
| Participants              | 6 | <p>(a) Cohort study—Give the eligibility criteria, and the sources and methods of selection of participants. Describe methods of follow-up</p> <p>Case-control study—Give the eligibility criteria, and the sources and methods of case ascertainment and control selection. Give the rationale for the choice of cases and controls</p> <p>Cross-sectional study—Give the eligibility criteria and the sources and methods of selection of participants</p> | 5,6, and 7 | <p>Lines (132 – 139); Source and study population</p> <p>Lines (155 – 167); A total of 423 nurses were selected through a stratified random sampling technique, and data was collected from 413 nurses.</p> <p>Lines (168– 174); Inclusion and exclusion criteria (eligibility criteria)</p> |
|                           |   | <p>(b) Cohort study—For matched studies, give matching criteria and number of exposed and unexposed</p> <p>Case-control study—For matched studies, give matching criteria and the number of controls per case</p>                                                                                                                                                                                                                                            | N/A        | This was a cross-sectional study                                                                                                                                                                                                                                                             |
| Variables                 | 7 | Clearly define all outcomes, exposures, predictors, potential confounders, and effect modifiers. Give diagnostic criteria, if applicable                                                                                                                                                                                                                                                                                                                     | 7          | Lines (175 – 191); Operational definition of variables                                                                                                                                                                                                                                       |
| Data sources/ measurement | 8 | For each variable of interest, give sources of data and details of methods of assessment (measurement). Describe comparability of assessment methods if there is more than one group                                                                                                                                                                                                                                                                         | 7 and 8    | Lines (192 – 201); Data collection tools and procedures                                                                                                                                                                                                                                      |
| Bias                      | 9 | Describe any efforts to address potential sources of bias                                                                                                                                                                                                                                                                                                                                                                                                    | 8          | Lines (202–211); To maintain data quality training was given to data collectors and supervisors. the questionnaire was pretested among 5% of the sample size. Quality was also maintained by                                                                                                 |

|                        |    |                                                                                                                                                                                                                                                                                           |         |                                                                                                                                                                                                                                                                                                                                                                                                                                                              |
|------------------------|----|-------------------------------------------------------------------------------------------------------------------------------------------------------------------------------------------------------------------------------------------------------------------------------------------|---------|--------------------------------------------------------------------------------------------------------------------------------------------------------------------------------------------------------------------------------------------------------------------------------------------------------------------------------------------------------------------------------------------------------------------------------------------------------------|
|                        |    |                                                                                                                                                                                                                                                                                           |         | close monitoring of the procedure, and checking on the completeness of the data on-site by the responsibility of supervisors and the principal investigator.                                                                                                                                                                                                                                                                                                 |
| Study size             | 10 | Explain how the study size was arrived at                                                                                                                                                                                                                                                 | 5 and 6 | Lines (140–154); The sample size was determined by using a formula to estimate a single population proportion with the assumption of a 95% level of confidence, 50% proportion, and a 5% marginal error.                                                                                                                                                                                                                                                     |
| Quantitative variables | 11 | Explain how quantitative variables were handled in the analyses. If applicable, describe which groupings were chosen and why                                                                                                                                                              | 9       | Lines (218–223); Binary logistic regression was used to determine the significant association between the independent and dependent variables. Those independent variables, which are less than 0.2 in bivariate analysis, were entered into multivariable logistic regressions. Association between the independent variable and dependent variable was considered significant if P-value was less than 0.05 from multivariate logistic regression analysis |
| Statistical methods    | 12 | (a) Describe all statistical methods, including those used to control for confounding                                                                                                                                                                                                     | 8       | Lines (213–223); Statistical Analysis                                                                                                                                                                                                                                                                                                                                                                                                                        |
|                        |    | (b) Describe any methods used to examine subgroups and interactions                                                                                                                                                                                                                       | N/A     | There were no subgroups                                                                                                                                                                                                                                                                                                                                                                                                                                      |
|                        |    | (c) Explain how missing data were addressed                                                                                                                                                                                                                                               | N/A     | There was no missing data                                                                                                                                                                                                                                                                                                                                                                                                                                    |
|                        |    | (d) Cohort study—If applicable, explain how loss to follow-up was addressed<br><br>Case-control study—If applicable, explain how matching of cases and controls was addressed<br><br>Cross-sectional study—If applicable, describe analytical methods taking account of sampling strategy | 6       | Lines (158 – 167); A total of 423 nurses were selected through a stratified random sampling technique, and data was collected from them                                                                                                                                                                                                                                                                                                                      |

|                  |     |                                                                                                                                                                                                   |          |                                                                                                                                                                                                                                                                                                                                            |
|------------------|-----|---------------------------------------------------------------------------------------------------------------------------------------------------------------------------------------------------|----------|--------------------------------------------------------------------------------------------------------------------------------------------------------------------------------------------------------------------------------------------------------------------------------------------------------------------------------------------|
|                  |     | (e) Describe any sensitivity analyses                                                                                                                                                             | N/A      |                                                                                                                                                                                                                                                                                                                                            |
| <b>Results</b>   |     |                                                                                                                                                                                                   |          |                                                                                                                                                                                                                                                                                                                                            |
| Participants     | 13* | (a) Report numbers of individuals at each stage of study—eg numbers potentially eligible, examined for eligibility, confirmed eligible, included in the study, completing follow-up, and analysed | N/A      | This was a cross-sectional study with only one stage.                                                                                                                                                                                                                                                                                      |
|                  |     | (b) Give reasons for non-participation at each stage                                                                                                                                              | N/A      |                                                                                                                                                                                                                                                                                                                                            |
|                  |     | (c) Consider use of a flow diagram                                                                                                                                                                | N/A      |                                                                                                                                                                                                                                                                                                                                            |
| Descriptive data | 14* | (a) Give characteristics of study participants (eg demographic, institutional, other) and information on exposures and potential confounders                                                      | 9 and 10 | Line (234-236); Table 1: Socio-demographic characteristics of the study participants on hypothermia prevention among perioperative patients in Amhara Regional State Referral Hospitals, Northwest Ethiopia, 2021(N=413).<br><br>Line (238-244); <b>Institutional and job-related factors of the respondents</b> of the study participants |
|                  |     | (b) Indicate number of participants with missing data for each variable of interest                                                                                                               | N/A      | There was no missing data                                                                                                                                                                                                                                                                                                                  |
|                  |     | (c) Cohort study—Summarise follow-up time (eg, average and total amount)                                                                                                                          | N/A      | This was a cross-sectional study                                                                                                                                                                                                                                                                                                           |
| Outcome data     | 15* | Cohort study—Report numbers of outcome events or summary measures over time                                                                                                                       | N/A      | This was cross-sectional study                                                                                                                                                                                                                                                                                                             |
|                  |     | Case-control study—Report numbers in each exposure category, or summary measures of exposure                                                                                                      | N/A      | This was a cross-sectional study                                                                                                                                                                                                                                                                                                           |

|                   |    |                                                                                                                                                                                                              |                    |                                                                                                                                                                                                                                                                                                                                                                                                                                                                                                                                                                                                                                                                                            |
|-------------------|----|--------------------------------------------------------------------------------------------------------------------------------------------------------------------------------------------------------------|--------------------|--------------------------------------------------------------------------------------------------------------------------------------------------------------------------------------------------------------------------------------------------------------------------------------------------------------------------------------------------------------------------------------------------------------------------------------------------------------------------------------------------------------------------------------------------------------------------------------------------------------------------------------------------------------------------------------------|
|                   |    | Cross-sectional study—Report numbers of outcome events or summary measures                                                                                                                                   | 10, 12, and 13     | <p>Lines (246–248); In this study, 244 (59.1%) with 95% CI: (54.7, 63.7) of the participants had good knowledge</p> <p>Lines (260–262); In this study, 208 (50.4%) with 95% CI: (45.5, 55) of the participants had good practice.</p>                                                                                                                                                                                                                                                                                                                                                                                                                                                      |
| Main results      | 16 | (a) Give unadjusted estimates and, if applicable, confounder-adjusted estimates and their precision (eg, 95% confidence interval). Make clear which confounders were adjusted for and why they were included | 10, 12, 13, and 20 | <p>Lines (246-248); In this study, 244 (59.1%) with 95% CI: (54.7, 63.7) of the participants had good knowledge</p> <p>Lines (260-262); In this study, 208 (50.4%) with 95% CI: (45.5, 55) of the participants had a good practice.</p> <p>Lines (282-284); Table 4- Bi-variable and multivariable analysis of factors associated with knowledge of nurses on perioperative hypothermia prevention in Amhara Region Referral Hospitals, Northwest Ethiopia.</p> <p>Lines (301-303); Table 5- Bi-variable and multivariable analysis of factors associated with the practice of nurses on perioperative hypothermia prevention in Amhara Region Referral Hospitals, Northwest Ethiopia.</p> |
|                   |    | (b) Report category boundaries when continuous variables were categorized                                                                                                                                    | N/A                | There was no continuous variable.                                                                                                                                                                                                                                                                                                                                                                                                                                                                                                                                                                                                                                                          |
|                   |    | (c) If relevant, consider translating estimates of relative risk into absolute risk for a meaningful time period                                                                                             | N/A                | There was no estimate of relative risk.                                                                                                                                                                                                                                                                                                                                                                                                                                                                                                                                                                                                                                                    |
| Other analyses    | 17 | Report other analyses done—eg analyses of subgroups and interactions, and sensitivity analyses                                                                                                               | N/A                | There was no sub groups and sensitivity analysis.                                                                                                                                                                                                                                                                                                                                                                                                                                                                                                                                                                                                                                          |
| <b>Discussion</b> |    |                                                                                                                                                                                                              |                    |                                                                                                                                                                                                                                                                                                                                                                                                                                                                                                                                                                                                                                                                                            |

|                          |    |                                                                                                                                                                            |       |                                                                                                                                                                                                                                                                                                                                                                                                                                                                                                        |
|--------------------------|----|----------------------------------------------------------------------------------------------------------------------------------------------------------------------------|-------|--------------------------------------------------------------------------------------------------------------------------------------------------------------------------------------------------------------------------------------------------------------------------------------------------------------------------------------------------------------------------------------------------------------------------------------------------------------------------------------------------------|
| Key results              | 18 | Summarise key results with reference to study objectives                                                                                                                   | 19-22 | Lines (306–387); Discussion                                                                                                                                                                                                                                                                                                                                                                                                                                                                            |
| Limitations              | 19 | Discuss limitations of the study, taking into account sources of potential bias or imprecision. Discuss both direction and magnitude of any potential bias                 | 22    | Lines (389–392); A self-reported questionnaire measure of knowledge and practice of nurses on the prevention of perioperative hypothermia is prone to social desirability bias and recall bias. Furthermore, this study was not triangulated with a qualitative method.                                                                                                                                                                                                                                |
| Interpretation           | 20 | Give a cautious overall interpretation of results considering objectives, limitations, multiplicity of analyses, results from similar studies, and other relevant evidence | 19-22 | Lines (306-392); Discussion and limitation and strength                                                                                                                                                                                                                                                                                                                                                                                                                                                |
| Generalizability         | 21 | Discuss the generalizability (external validity) of the study results                                                                                                      | 22    | Lines (393-407); This study revealed that nurses' knowledge and practice regarding the prevention of perioperative hypothermia was found to be inadequate as compared to the recommended guidelines. Having higher educational status, being male, and attending training showed a positive and significant association with good knowledge of perioperative hypothermia prevention. Whereas, factors contributing to practice were working ward, training, job satisfaction, and knowledge of nurses. |
| <b>Other information</b> |    |                                                                                                                                                                            |       |                                                                                                                                                                                                                                                                                                                                                                                                                                                                                                        |
| Funding                  | 22 | Give the source of funding and the role of the funders for the present study and, if applicable, for the original study on which the present article is based              | 24    | Lines (437)-This research received no specific grant from any funding agency in the public, commercial, or not-for-profit sectors.                                                                                                                                                                                                                                                                                                                                                                     |

\*Give information separately for cases and controls in case-control studies and, if applicable, for exposed and unexposed groups in cohort and cross-sectional studies.

# BMJ Open

## Knowledge and Practice of Nurses regarding Perioperative Hypothermia Prevention at Northwest Amhara Regional State Referral Hospitals, Northwest Ethiopia: A cross-sectional study

|                                 |                                                                                                                                                                                                                                                                                                                                                                                                                                                      |
|---------------------------------|------------------------------------------------------------------------------------------------------------------------------------------------------------------------------------------------------------------------------------------------------------------------------------------------------------------------------------------------------------------------------------------------------------------------------------------------------|
| Journal:                        | <i>BMJ Open</i>                                                                                                                                                                                                                                                                                                                                                                                                                                      |
| Manuscript ID                   | bmjopen-2022-068131.R2                                                                                                                                                                                                                                                                                                                                                                                                                               |
| Article Type:                   | Original research                                                                                                                                                                                                                                                                                                                                                                                                                                    |
| Date Submitted by the Author:   | 05-Sep-2023                                                                                                                                                                                                                                                                                                                                                                                                                                          |
| Complete List of Authors:       | Woretaw, Ashenafi; University of Gondar College of Medicine and Health Sciences, Surgical Nursing Department<br>Yimer Mekkonen, Bezenaw; University of Gondar, Emergency and Critical Care Nursing Department<br>Tsegaye, Netsanet; University of Gondar College of Medicine and Health Sciences, Emergency and Critical Care nursing<br>Dellie, Endalkachew; University of Gondar College of Medicine and Health Sciences, Health System and policy |
| <b>Primary Subject Heading</b>: | Nursing                                                                                                                                                                                                                                                                                                                                                                                                                                              |
| Secondary Subject Heading:      | Surgery, Nutrition and metabolism                                                                                                                                                                                                                                                                                                                                                                                                                    |
| Keywords:                       | NUTRITION & DIETETICS, PAIN MANAGEMENT, SURGERY                                                                                                                                                                                                                                                                                                                                                                                                      |
|                                 |                                                                                                                                                                                                                                                                                                                                                                                                                                                      |

SCHOLARONE™  
Manuscripts



I, the Submitting Author has the right to grant and does grant on behalf of all authors of the Work (as defined in the below author licence), an exclusive licence and/or a non-exclusive licence for contributions from authors who are: i) UK Crown employees; ii) where BMJ has agreed a CC-BY licence shall apply, and/or iii) in accordance with the terms applicable for US Federal Government officers or employees acting as part of their official duties; on a worldwide, perpetual, irrevocable, royalty-free basis to BMJ Publishing Group Ltd ("BMJ") its licensees and where the relevant Journal is co-owned by BMJ to the co-owners of the Journal, to publish the Work in this journal and any other BMJ products and to exploit all rights, as set out in our [licence](#).

The Submitting Author accepts and understands that any supply made under these terms is made by BMJ to the Submitting Author unless you are acting as an employee on behalf of your employer or a postgraduate student of an affiliated institution which is paying any applicable article publishing charge ("APC") for Open Access articles. Where the Submitting Author wishes to make the Work available on an Open Access basis (and intends to pay the relevant APC), the terms of reuse of such Open Access shall be governed by a Creative Commons licence – details of these licences and which [Creative Commons](#) licence will apply to this Work are set out in our licence referred to above.

Other than as permitted in any relevant BMJ Author's Self Archiving Policies, I confirm this Work has not been accepted for publication elsewhere, is not being considered for publication elsewhere and does not duplicate material already published. I confirm all authors consent to publication of this Work and authorise the granting of this licence.



1  
2  
3 1 **Knowledge and Practice of Nurses regarding Perioperative Hypothermia Prevention at**  
4 **Northwest Amhara Regional State Referral Hospitals, Northwest Ethiopia: A cross-**  
5 **sectional study**  
6  
7

8  
9 4 Ashenafi Worku Woretaw<sup>1</sup>, Bezenaw Yimer Mekkonen <sup>2</sup>, Netsanet Tsegaye<sup>2</sup>, and Endalkachew  
10  
11 5 Dellie<sup>3</sup>  
12

13 6 <sup>1</sup>Department of Surgical Nursing, School of Nursing, College of Medicine and Health Sciences,  
14  
15 7 University of Gondar, Gondar, Ethiopia

16 8 <sup>2</sup>Department of Emergency and Critical Care Nursing, School of Nursing, College of Medicine  
17  
18 9 and Health Sciences, University of Gondar, Gondar, Ethiopia

19  
20 10 <sup>3</sup>Department of Health Systems and Policy, Institute of Public Health, College of Medicine and  
21  
22 11 Health Sciences, University of Gondar, Gondar, Ethiopia  
23

24 12 **Email addresses:**

25  
26 13 Ashenafi Worku Woretaw (AWW): [ashuw2007@gmail.com](mailto:ashuw2007@gmail.com)

27  
28 14 Institutional email: [Ashenafi.Worku@uog.edu.et](mailto:Ashenafi.Worku@uog.edu.et)  
29

30 15 Bezenaw Yimer Mekkonen (BY): [bezyim2007@gmail.com](mailto:bezyim2007@gmail.com)

31  
32 16 Netsanet Tsegaye (NT): [netsanet.gondar@gmail.com](mailto:netsanet.gondar@gmail.com)

33  
34 17 Endalkachew Dellie (ED): [endalkd.07@gmail.com](mailto:endalkd.07@gmail.com)  
35  
36 18

37  
38 18 **\*Correspondence author:**

39  
40 19 AWW: [ashuw2007@gmail.com](mailto:ashuw2007@gmail.com)

41  
42 20 PO Box: 196, University of Gondar, Gondar, Ethiopia  
43  
44

45 21 **Word count:** 3,998 (Introduction to conclusion).  
46  
47 22  
48  
49 23  
50  
51 24  
52  
53 25  
54  
55 26  
56  
57  
58  
59  
60

## 27 Abstract

28 **Objectives** Nurses are primarily responsible body to preventing the occurrence of hypothermia  
29 among surgical patients, as it has been reported that maintenance of normal body temperature  
30 decreases the length of hospitalization by approximately up to 40%, the risk of surgical site  
31 infection by 64%, and mortality rate by four folds. Therefore this study aimed to assess nurses'  
32 knowledge, practices, and associated factors toward perioperative hypothermia prevention.

33 **Design** Cross-sectional study design.

34 **Setting** Northwest Amhara Regional State Referral Hospitals, Northwest Ethiopia

35 **Participants** A total of 413 nurses were working in a perioperative unit of five referral hospitals.

36 **Main outcome measures** Perioperative hypothermia prevention knowledge and practices among  
37 nurses

38 **Results** A total of 244 (59.1%) of the respondents had good knowledge and 208 (50.4%) had  
39 good practice in perioperative hypothermia prevention. Factors affecting nurses' knowledge on  
40 prevention of perioperative hypothermia were being male [AOR = 1.61, 95% CI (1.02-2.53)],  
41 having a bachelor, and master's degree [AOR = 2.50; 95% CI (1.25-5.00), and 4.39; (1.45-  
42 13.20)] respectively, and took training [AOR = 3.68; 95% CI (2.14-6.33)]. Whereas nurses who  
43 were working in recovery and intensive care units [AOR = 2.87; 95% CI (1.08-7.58), and 2.39;  
44 95% CI (1.09-5.22)] respectively, took training [AOR = 2.64; 95% CI (1.53-4.57)], had a Job  
45 satisfaction [AOR 2.15; 95% CI (1.34-3.43)], and knowledgeable nurses [AOR 2.64; 95% CI  
46 (1.63-4.27)] were factors affecting nurse's practice on perioperative hypothermia prevention.

47 **Conclusion** Nurses' knowledge and practice regarding the prevention of perioperative  
48 hypothermia were found to be inadequate. So, it is better to strengthen training, educational  
49 opportunities, equip wards with standardized guidelines and materials, and motivate and create a  
50 safe working environment.

51 **Keywords:** Perioperative hypothermia, Ethiopia, Knowledge, Practice, Nurses.

## 52 Limitations and Strengths of the Study

- 53 ■ Due to the time constraint, the observational data collection method was not done.
- 54 ■ Furthermore, this study was not triangulated with the qualitative method
- 55 ■ Due to the limited availability of literature, I have used unpublished sources.
- 56 ■ Despite these limitations, this study covers a large setting area.

## 57 **Background**

58 Hypothermia is a common health problem in patients having surgery, that is characterized as a  
59 body temperature below 36°C (96.8°F) and it is usually caused by too much heat loss from cold  
60 weather exposure, anesthetic effect, and administration of cold intravenous, or irrigation fluids  
61 (1-3). Hypothermia decelerates all physiologic roles including metabolic rate, mental awareness,  
62 nerve conduction, neuromuscular reaction times, and both the cardiovascular and respiratory  
63 systems, consequently disturbing patients' comfort and leading to longer hospitalizations, higher  
64 costs, and increasing mortality (1, 4).

65 Different studies conducted in different areas revealed that the magnitude of perioperative  
66 hypothermia in Brazil was 56.7%(5), in Australia 74% (6), and in Turkey research hospital  
67 hospitals of Ankara, and Trakya University Hospital were 78.6% and 63.3% respectively (7, 8).  
68 In other studies conducted in Thailand, the incidence of preoperative, intraoperative, and  
69 postoperative hypothermia was 0.4%, 73.5%, and 11.9% respectively (9). While the study  
70 conducted in Deutschland to evaluate the hypothermia rates achieved with pre-warming and  
71 without pre-warming methods the result revealed patients subjected to pre-warming showed an  
72 intraoperative hypothermia rate of 15.8% and a postoperative hypothermia rate of 5.1% while  
73 patients without pre-warming showed an intraoperative hypothermia rate of 30.4% and  
74 a postoperative hypothermia rate of 12.4%. This means a 52% reduction in the intraoperative  
75 hypothermia rate and a 41% reduction in the postoperative hypothermia rate for patients who  
76 received pre-warming (10). Furthermore, studies conducted in Ethiopia, Tikur Anbessa  
77 Specialized Hospital the overall magnitude of preoperative, intraoperative, and postoperative  
78 hypothermia were 16.2%, 53.2%, and 31.3%, respectively (11) while, in the University of  
79 Gondar Comprehensive Specialized Referral Hospital (UoGCSRH) the incidence of pre, intra,  
80 and post-operative hypothermia were 23.4%, 49.7%, and 50.6% respectively (12). However  
81 available literature shows that nurses' knowledge and practice towards perioperative  
82 hypothermia prevention is low despite the high incidence, serious consequences, and availability  
83 of effective interventions to prevent and treat this frequent surgical complication (2, 13). In  
84 interventional studies conducted on perioperative hypothermia prevention in Brazil and Turkey,  
85 55.9% and 61.77% of nurses had good knowledge respectively before they were taken the  
86 training (4, 14). Another cross-sectional study was done in Ethiopia regarding perioperative

1  
2  
3 87 hypothermia prevention in trauma patients, only 52.1% of nurses had good knowledge (15). In  
4 88 studies conducted in South Africa and Gambia, 46% and 19% of nurses had good practice  
5 89 respectively on perioperative hypothermia prevention (13, 16).  
6  
7  
8

9 90 According to the Association of Perioperative Register Nurses (AORN) Guideline, nurses need  
10 91 to have knowledge and skills on hypothermia prevention during the perioperative phase. This  
11 92 includes measuring the patient's body temperature, selecting methods for the prevention of  
12 93 unintended hypothermia, and implementing the selected insulation and warming interventions  
13 94 (17). Warming intervention measures include warming patients before surgery, during surgery,  
14 95 and after surgery by using passive insulation and active warming methods such as warmed cotton  
15 96 blankets, surgical draping, thermal garments, forced-air warming devices, electric warming  
16 97 blankets, and warmed fluids (18, 19).  
17  
18  
19  
20  
21  
22

23 98 Preventing heat loss and maintaining normal body temperature are important nursing care in an  
24 99 early phase of resuscitation as metabolic changes accompanied by injury cannot be corrected  
25 100 when patients are in hypothermic status (20). Nurses need to be cognizant of the risks associated  
26 101 with each perioperative phase of the patient in the prevention of hypothermia(21). Preserving a  
27 102 normal body temperature during the surgical experience enhances the patient's chance of  
28 103 preventing postoperative complications (22). Different evidence reported that maintenance of  
29 104 normal body temperature decreases the length of hospitalization by approximately up to 40%, the  
30 105 risk of surgical site infection by 64%, may prevent the costs of potential stay in the intensive  
31 106 care unit by \$1,000 and a prolonged hospital stay by \$465 per day, and also decreasing mortality  
32 107 rate by four folds (23-25).  
33  
34  
35  
36  
37  
38  
39  
40

41 108 If nurses do not have adequate knowledge and skill in the prevention of perioperative  
42 109 hypothermia, its occurrence is inevitable. Even if nurses' knowledge and practice are important  
43 110 in the prevention of perioperative hypothermia and its complications, available literature  
44 111 revealed that nurses had significant knowledge and practice gaps (15). Different socio-  
45 112 demographic and institutional factors which include age, marital status, educational level, work  
46 113 experience, presence of guidelines and risk assessment protocol, taking training, reading updated  
47 114 evidence, and job satisfaction affect nurses' knowledge and practice (2, 13, 26, 27).  
48  
49  
50  
51  
52  
53  
54  
55  
56  
57  
58  
59  
60

1  
2  
3 115 In Ethiopia, there are no studies available regarding nurses' knowledge and practice on  
4  
5 116 perioperative hypothermia prevention. Therefore, the purpose of this study is to assess nurses'  
6  
7 117 knowledge, practice, and their determinant factors of perioperative hypothermia prevention in  
8  
9 118 Northwest Amhara Regional State Referral Hospitals, Northwest Ethiopia.

## 11 119 **Methods**

### 14 120 **Study design and period**

15 121 An institutional-based cross-sectional study was conducted in perioperative units/wards of five  
16  
17 122 referral hospitals from March 25 to May 20/2021.

### 19 123 **Study area**

21 124 The study was conducted in Northwest Amhara Regional State Referral Hospitals, Northwest  
22  
23 125 Ethiopia. Northwest Amhara is found in the northwestern part of Ethiopia. There are five  
24  
25 126 governmental referral hospitals in Northwest Amhara regional state namely University of  
26  
27 127 Gondar Comprehensive Specialized Referral Hospital (UoGCSRH), Felege Hiwot Referral  
28  
29 128 Hospital (FHRH), Tibebe Gion Specialized Referral Hospital (TGSRH), Debre Markos Referral  
30  
31 129 Hospital (DMRH), and Debre Tabor Comprehensive Referral Hospital (DTCRH). All hospitals  
32  
33 130 provide outpatient and inpatient services. The surgical department is one of the actively serving  
34  
35 131 departments giving emergency and elective surgery among the services given by the hospitals.  
36  
37 132 All five hospitals have different surgical units in their surgical department such as surgical  
38  
39 133 emergency, operation room, recovery ward, surgical ward, orthopedics ward, and surgical  
40  
41 134 intensive care unit (ICU). According to information obtained from the administrative offices of  
42  
43 135 these hospitals, there are 1682 nurses, who provide services. Among those 725 nurses (153 in  
44  
45 136 UoGCSRH, 220 in FHRH, 144 in TGSRH, 127 in DMRH, and 81 in DTCRH) are working in  
46  
47 137 our study unit (28-32). Nurses who are working in the perioperative unit provide different  
48  
49 138 hypothermia preventive activities like covering patients with linens and blankets, measuring  
50  
51 139 patients' temperature, warming intravenous fluids; adjusting room temperature, and so on.  
52  
53 140 Because preventing perioperative hypothermia is a crucial role for nurses.

### 51 141 **Source population**

1  
2  
3 142 The source populations were all nurses who were working in the emergency, operation room,  
4 143 recovery ward, surgical ward, orthopedics ward, and surgical ICU of Northwest Amhara  
5 144 Regional State Referral Hospitals, Northwest Ethiopia.

### 145 **Study population**

11 146 The study population included nurses who were working in an emergency ward, operation room,  
12 147 recovery ward, surgical ward, orthopedics ward, and surgical ICU of UoGCSRH, DTCRH,  
13 148 DMRH, TGRH, and FHRH during the data collection period.

### 149 **Sample size and sampling procedure**

#### 150 **Sample size**

21 151 The sample size of the study was calculated using the formula for the estimation of a single  
22 152 population proportion and the assumptions were the proportion of knowledge and practice of  
23 153 nurses regarding hypothermia prevention was 50% (since there was no study conducted in our  
24 154 country), with 95% level of confidence and 5% margin of error. By using a z-value of 1.96 at  
25 155 95% CI the minimum sample size for this study was:

30 156 As:  $n = Z\alpha/2^2 * P (1-P) / d^2$

31 157 n = sample size

33 158 p = proportion of knowledge & practice of nurses on hypothermia prevention =0.5

35 159 d = maximum allowable error (margin of error) = 0.05

37 160 Z = value of standard normal distribution at 95% confidence level ( $z=1.96$ ).

39 161  $n = (1.96) (1.96) *(0.5) (1-0.5) / (0.05) (0.05) = 384$  subjects;

41 162  $\Rightarrow$  By adding a 10% allowance for non-response rate the total sample size was

42 163  $384+10\%=423$

#### 164 **Sampling procedure**

47 165 The study was performed on nurses who were working in the emergency surgical (including the  
48 166 trauma unit), operation room, recovery ward, surgical ward, orthopedics ward, and surgical ICU  
49 167 of Northwest Amhara Regional State Referral Hospitals, Northwest Ethiopia. A stratified  
50 168 sampling technique was employed to recruit the required participants for the study. First, the  
51 169 study participants are stratified from each hospital and working ward/unit and allocated the

1  
2  
3 170 required sample for each stratum proportionally. According to all hospitals human resources, and  
4  
5 171 administration reports the total number of nurses who were working in these units or wards was  
6  
7 172 725. Based on the number of nurses working in each hospital, 423 samples were proportionally  
8  
9 173 allocated from 725 (from 153 - 89 in UoGCSRH, 144 - 84 in TGRH, 220 -128 in FHRH, 81 - 48  
10  
11 174 in DTRH, and 127 - 74 in DMRH). Finally, those participants were taken by lottery method of  
12  
13 175 simple random sampling technique from each sampling frame (Supplemental Figure)

#### 14 176 **Inclusion and exclusion criteria**

15  
16 177 All nurses who were working in the surgical emergency, operation room, recovery ward, surgical  
17  
18 178 ICU, surgical ward, and orthopedic ward of Northwest Amhara Regional State Referral  
19  
20 179 Hospitals, Northwest Ethiopia during the time of data collection were included in this study.  
21  
22 180 Matron and ward coordinator nurses were excluded because those nurses are primarily  
23  
24 181 responsible is coordinating, monitoring, and evaluating the staff nurses rather they doing routine  
25  
26 182 activities.

#### 26 183 **Operational definitions**

27  
28 184 **Knowledge:** Is theoretical or practical understanding of hypothermia and its prevention method  
29  
30 185 through education or experience. Based on this research the percentage scores were graded as  
31  
32 186 'poor', and 'good to determine the knowledge level.

33  
34 187 **Good knowledge:** If the study participants answer the knowledge questions above or equal to the  
35  
36 188 computed median they are considered as having good knowledge.

37  
38 189 **Poor knowledge:** If the study participants answered, the knowledge questions below the  
39  
40 190 computed median were considered as having poor knowledge.

41  
42 191 **Practice:** Activities acting by nurses to prevent hypothermia. Items in this category of the Likert  
43  
44 192 scale were coded as 0 to 2 for: never, sometimes, and always.

45  
46 193 **Good practice:** The study participants who answered above or equal to the computed median of  
47  
48 194 practice questions were considered as having good practice.

49  
50 195 **Poor practice:** The study participants who answered below the computed median of practice  
51  
52 196 questions were considered to have poor practice.

1  
2  
3 197 **Job satisfaction:** When the total score for the job satisfaction questionnaire was greater than or  
4  
5 198 equal to the computed median, we said they were satisfied, and less than the computed median,  
6  
7 199 we said they were dissatisfied with the overall aspect of their work.

### 200 **Data collection instruments and procedure**

201 Data was collected by using a self-administered questionnaire which was adapted from  
202 guidelines of AORN and NICE perioperative hypothermia prevention, and other literature which  
203 involves 27 questions for knowledge and 14 questions for practice (13, 33-35), and 15 questions  
204 for Socio-demographic, institutional and other characteristics (2, 4, 13, 26, 27, 33, 36). Besides,  
205 three advisors who have experience in establishing through revision of content validity  
206 instruments were consulted to assess the questionnaire's validity. The questionnaires were  
207 prepared in the English language based on the study objectives, focusing on the background  
208 information of hypothermia and its prevention. Five BSc nurse staff who was working other than  
209 the study wards were recruited for data collection and two MSc holder nurses were recruited as a  
210 supervisor. Overall, the data collection process was coordinated and supervised by the principal  
211 investigator.

### 212 **Data quality control**

213 To ensure the quality of the collected data, data collectors and supervisors underwent one-day  
214 training on the purpose of the study and the data collection procedure. The questionnaire was  
215 additionally pretested at Woldia Comprehensive Referral Hospital with 5% of the sample size.  
216 Internal consistency was checked by computing Cronbach's  $\alpha$  for both dependent variables and  
217 job satisfaction questionnaires. The tests showed 0.81, 0.77, and 0.91 for knowledge, practice,  
218 and job satisfaction respectively. Supervisors and primary investigator conducted routine  
219 supervision to verify the consistency and completeness of the questionnaires that were filled out.  
220 Incomplete questionnaires were put in offices arranged for this purpose so that participants  
221 completed their questionnaires.

### 222 **Data processing and analysis**

223 After the data was checked for its consistency and completeness, data were entered into Epi Info  
224 version 7 and exported into SPSS version 25 for analysis. A frequency table was used to describe



225 the participant characteristics knowledge and practice scores. Multicollinearity was checked by  
 226 using the variance inflation factor and its values were between 1 and 10. Model adequacy was  
 227 checked by using the Hosmer-Lemeshow goodness of fit test and the model was fitted well  
 228 which indicates .856 and .993 for knowledge and practice respectively. Binary logistic regression  
 229 was used to determine the significant association between the independent and dependent  
 230 variables. Those independent variables, which are less than 0.2 in bivariate analysis, were  
 231 entered into multivariable logistic regressions. The association between the independent variable  
 232 and dependent variable was considered the significant if P-value was less than 0.05 from  
 233 multivariate logistic regression analysis.

### 234 **Patient and public involvement**

235 It was not appropriate or possible to involve patients or the public in the design, conduct, report,  
 236 or dissemination plans of our research because this study was done on Nurses.

## 237 **Results**

### 238 **Socio-demographic characteristics of the respondents**

239 A total of 423, with a response rate of 97.6% of study participants were involved in this study.  
 240 The median age (IQR) of the study participants was 29 (27, 32) years, ranging from 20-58 years  
 241 and almost half of the participants were under the age category between 26 to 30 years. Two  
 242 hundred thirteen (51.6%) of the participants were male, and 235(56.9%) were married. Out of  
 243 413 nurses, three-fourths of the respondents had a bachelor's degree (Table 1).

244 Table 1: Socio-demographic characteristics of nurses on perioperative hypothermia prevention in  
 245 Amhara Regional State Referral Hospitals, Northwest Ethiopia, 2021(N=413).

| Variable   | Response   | Frequency (N=413) | Percentage (%) |
|------------|------------|-------------------|----------------|
| <b>Sex</b> | Male       | 213               | 51.6           |
|            | Female     | 200               | 48.4           |
| <b>Age</b> | ≤ 25 years | 53                | 12.8           |
|            | 26-30      | 224               | 54.2           |
|            | 31-35      | 86                | 20.8           |
|            | ≥ 35       | 50                | 12.1           |

|                            |           |     |      |
|----------------------------|-----------|-----|------|
| <b>Marital status</b>      | Single    | 163 | 39.5 |
|                            | Married   | 235 | 56.9 |
|                            | Divorced  | 12  | 2.9  |
|                            | Widowed   | 3   | .7   |
| <b>Educational status</b>  | Diploma   | 59  | 14.3 |
|                            | Degree    | 311 | 75.3 |
|                            | Master    | 43  | 10.4 |
| <b>Work experience</b>     | ≤ 5 years | 157 | 38   |
|                            | 6-10      | 181 | 43.8 |
|                            | 11-15     | 57  | 13.8 |
|                            | ≥ 16      | 18  | 4.4  |
| <b>Monthly salary(ETB)</b> | ≤ 5000    | 42  | 10.2 |
|                            | 5001-7000 | 158 | 38.3 |
|                            | 7001-9000 | 172 | 41.6 |
|                            | ≥ 9001    | 41  | 9.9  |

246 *ETB- Ethiopian Birr*

## 247 **Institutional and job-related factors of the respondents**

248 From 413, 268(64.9%) of nurses did not take training about perioperative hypothermia  
 249 prevention. half of the respondents reported that they were reading or reviewing updated  
 250 evidence, and only 121(29.3%) of participants were notified of the presence of guidelines or  
 251 protocols in their working area. Out of the study participants, 268 (64.9%) and 342 (82.8%) had  
 252 a shortage of thermometers and warming materials respectively. From 413 study participants,  
 253 nearly half of 217 (52.5%) participants were satisfied with their jobs (Supplemental Table).

## 254 **Knowledge of nurses on hypothermia prevention**

255 The overall median knowledge score of the study participants on perioperative hypothermia  
 256 prevention was 18 with an IQR of (16, 21). In this study, 244 (59.1%) with 95% CI: (54.7, 63.7)  
 257 of the participants had good knowledge. Among a total of knowledge assessment questions,

258 359(86.9%) participants have correctly answered the statement about thermoregulation. Three-  
 259 fourths of the participants gave the correct answer of anesthetic drugs increase heat loss while  
 260 250(60.5) of the participants correctly answered the complications of hypothermia in surgical  
 261 patients. Only 83(20.1%) of the participants were correctly respond in the theatre room, the  
 262 patient's temperature should be measured every 30 minutes while in the recovery room, every 15  
 263 minutes (Table 2).

264 Table 2. Nurse's responses on knowledge of perioperative hypothermia prevention (N=413)

| Statements about perioperative hypothermia prevention                                                                                                                                      | True / False | Correct answer |      | Wrong answer /don't know |      |
|--------------------------------------------------------------------------------------------------------------------------------------------------------------------------------------------|--------------|----------------|------|--------------------------|------|
|                                                                                                                                                                                            |              | N              | %    | N                        | %    |
| The internal environment of humans can be maintained by thermoregulation.                                                                                                                  | T*           | 359            | 86.9 | 54                       | 13.1 |
| PH at any time during the perioperative cycle is characterized as a core body temperature < 36 ° C.                                                                                        | T*           | 288            | 69.7 | 125                      | 30.3 |
| Anesthetic drugs decrease heat loss in surgical patients.                                                                                                                                  | F**          | 311            | 75.3 | 102                      | 24.7 |
| Cold IV fluids and blood products increase heat loss.                                                                                                                                      | T*           | 288            | 69.5 | 126                      | 30.5 |
| PH is not associated with complications such as changes in drug metabolism, healing complications, shivering, clotting defects, cardiac morbidity, and prolonged post-anesthetic recovery. | F**          | 250            | 60.5 | 163                      | 39.5 |
| To minimize post-operative complications, nurses should advise patients to bring along additional clothing to help them stay warm before surgery                                           | T*           | 339            | 82.1 | 74                       | 17.9 |
| The pulmonary artery catheter, distal esophagus, urinary bladder, rectum, zero heat-flux are some of the sites for temperature measurements.                                               | T*           | 174            | 42.1 | 239                      | 57.9 |
| Nurses should be well trained and knowledgeable about the use of both temperature recording and warming devices                                                                            | T*           | 346            | 83.8 | 67                       | 16.2 |
| Forced-air warming devices, warm water circulating and conductive devices are not some of the devices for warming surgical patients                                                        | F**          | 241            | 58.4 | 172                      | 41.6 |
| The method for temperature monitoring should not be chosen based on the criteria for a procedure                                                                                           | F**          | 281            | 68   | 132                      | 32   |
| To ensure accurate information, the team takes the patient's temperature at 15- minute intervals using different measuring devices at different sites.                                     | F**          | 138            | 33.4 | 275                      | 66.6 |
| Patients with temperature < 36.0°C undergoing anesthesia & those having a high risk of cardiovascular complications are at higher risk for IPH                                             | T*           | 293            | 70.9 | 120                      | 29.1 |
| It is not necessary to measure patients' temperature in the hour before                                                                                                                    | F**          | 279            | 67.6 | 134                      | 32.4 |

departing the ward since it will be measured at the theatre.

|                                                                                                                                             |    |     |      |     |      |
|---------------------------------------------------------------------------------------------------------------------------------------------|----|-----|------|-----|------|
| Except in urgent circumstances, preoperative patients with temperatures of < 36.0°C should be warmed for 30' by using active warming method | T* | 284 | 68.8 | 129 | 31.2 |
|---------------------------------------------------------------------------------------------------------------------------------------------|----|-----|------|-----|------|

|                                                                                                                 |    |     |      |    |      |
|-----------------------------------------------------------------------------------------------------------------|----|-----|------|----|------|
| Special attention should be given to the comfort of surgical patients having difficulties expressing themselves | T* | 335 | 81.1 | 78 | 18.9 |
|-----------------------------------------------------------------------------------------------------------------|----|-----|------|----|------|

|                                                                                                                                                   |    |     |      |    |      |
|---------------------------------------------------------------------------------------------------------------------------------------------------|----|-----|------|----|------|
| The method for warming patients should be chosen based on planned procedure, patient position, IV access site, and warming equipment constraints. | T* | 333 | 80.6 | 80 | 19.4 |
|---------------------------------------------------------------------------------------------------------------------------------------------------|----|-----|------|----|------|

|                                                                                                                            |     |     |      |     |      |
|----------------------------------------------------------------------------------------------------------------------------|-----|-----|------|-----|------|
| Critical incidence reporting is not necessary for patients coming into the theatre with a temperature of less than 36.0°C. | F** | 259 | 62.7 | 154 | 37.3 |
|----------------------------------------------------------------------------------------------------------------------------|-----|-----|------|-----|------|

|                                                                                               |    |     |      |     |      |
|-----------------------------------------------------------------------------------------------|----|-----|------|-----|------|
| Induction of anesthesia should not begin unless the patient's temperature is 36.0°C or above. | T* | 203 | 49.2 | 210 | 50.8 |
|-----------------------------------------------------------------------------------------------|----|-----|------|-----|------|

|                                                                                                                                        |    |     |      |     |      |
|----------------------------------------------------------------------------------------------------------------------------------------|----|-----|------|-----|------|
| The theatre's room temperature should be at least 21°C which can be adjusted to allow better working once active warming is initiated. | T* | 273 | 66.1 | 140 | 33.9 |
|----------------------------------------------------------------------------------------------------------------------------------------|----|-----|------|-----|------|

|                                                                                                                                   |    |     |      |     |      |
|-----------------------------------------------------------------------------------------------------------------------------------|----|-----|------|-----|------|
| All irrigation fluids used intraoperative should be warmed in a thermostatically controlled cabinet to a temperature of 38- 40°C. | T* | 214 | 51.8 | 199 | 48.2 |
|-----------------------------------------------------------------------------------------------------------------------------------|----|-----|------|-----|------|

|                                                                                                  |    |     |    |     |    |
|--------------------------------------------------------------------------------------------------|----|-----|----|-----|----|
| Fluid warming devices should be used to warm IV fluids (500mls or more) & blood products to 37°C | T* | 260 | 63 | 153 | 37 |
|--------------------------------------------------------------------------------------------------|----|-----|----|-----|----|

|                                                                                                                                           |    |     |    |     |    |
|-------------------------------------------------------------------------------------------------------------------------------------------|----|-----|----|-----|----|
| Regardless of the temperatures of patients before leaving the ward, they should be warmed using active warming method once in the theatre | T* | 256 | 62 | 157 | 38 |
|-------------------------------------------------------------------------------------------------------------------------------------------|----|-----|----|-----|----|

|                                                                                                                                  |    |     |      |     |      |
|----------------------------------------------------------------------------------------------------------------------------------|----|-----|------|-----|------|
| The surgical patient should be well covered throughout surgery to conserve heat and only be exposed during surgical preparation. | T* | 310 | 75.1 | 103 | 24.9 |
|----------------------------------------------------------------------------------------------------------------------------------|----|-----|------|-----|------|

|                                                                                                                                               |    |     |      |    |      |
|-----------------------------------------------------------------------------------------------------------------------------------------------|----|-----|------|----|------|
| During the postoperative period, hypothermic patients should be warmed using AWM until they become warm before transferring them to the ward. | T* | 348 | 84.3 | 65 | 15.7 |
|-----------------------------------------------------------------------------------------------------------------------------------------------|----|-----|------|----|------|

|                                                                                                                 |    |     |      |    |      |
|-----------------------------------------------------------------------------------------------------------------|----|-----|------|----|------|
| Patients should be provided with at least 1 cotton sheet, 2 blankets, or a duvet during the postoperative phase | T* | 319 | 77.2 | 94 | 22.8 |
|-----------------------------------------------------------------------------------------------------------------|----|-----|------|----|------|

|                                                                                                                      |     |    |      |     |      |
|----------------------------------------------------------------------------------------------------------------------|-----|----|------|-----|------|
| While in the OR, the patients' temperature should be measured every 15 minutes and every 30 minutes while in the RR. | F** | 83 | 20.1 | 330 | 79.9 |
|----------------------------------------------------------------------------------------------------------------------|-----|----|------|-----|------|

|                                                                                                                                                 |    |     |      |    |      |
|-------------------------------------------------------------------------------------------------------------------------------------------------|----|-----|------|----|------|
| The temperature of post-operative patients should be recorded on arrival in the ward and be documented as part of a routine 4-hour observation. | T* | 337 | 81.6 | 76 | 18.4 |
|-------------------------------------------------------------------------------------------------------------------------------------------------|----|-----|------|----|------|

265 T\*-True statement, F\*\*-False statement, N- Number of participants.

## 266 Practice of nurses on hypothermia prevention

267 The overall median practice score of the study participants on perioperative hypothermia  
 268 prevention was 18 with an IQR of (14, 21). In this study, 208 (50.4%) with 95% CI: (45.5, 55) of  
 269 the participants had good practice. Among practice assessment questions, 258(62.5%) of the

respondents measured temperature as soon as the patient arrived, and 224(54.2%) of the respondents were always assessing the signs and symptoms of hypothermia. Nearly half of the respondents 214(51.8%) and 213(51.6%) were sometimes maintaining ambient room temperature according to guidelines and also applying warm intravenous, blood products, and irrigation fluids respectively. Among 413 participants, 185(44.8%) of the respondents were reported never using forced-air warming devices, warm water circulating devices, and conductive devices for warming surgical patients (Table 3).

Table 3. Nurse's responses on practice of perioperative hypothermia prevention (N=413)

| Hypothermia prevention practices                                                                                                | Never |      | Some times |      | Always |      |
|---------------------------------------------------------------------------------------------------------------------------------|-------|------|------------|------|--------|------|
|                                                                                                                                 | N     | %    | N          | %    | N      | %    |
| Do you measure temperature as soon as the patient arrival?                                                                      | 21    | 5.1  | 134        | 32.4 | 258    | 62.5 |
| Do you measure temperature regularly according to guidelines?                                                                   | 50    | 12.1 | 202        | 48.9 | 161    | 39   |
| Do you warm intravenous, blood products, and irrigation fluids using warming devices before administering to patients?          | 112   | 27.1 | 213        | 51.6 | 88     | 21.3 |
| Do you cover the mattress plastic sheet with dry linen before patient admission?                                                | 59    | 14.3 | 200        | 48.4 | 154    | 37.3 |
| Do you use forced-air warming devices, warm water circulating devices, and conductive devices for warming patients?             | 185   | 44.8 | 170        | 41.2 | 58     | 14   |
| Do you communicate your assessment findings on factors that could lead to hypothermia to all members of the perioperative team? | 57    | 13.8 | 160        | 38.7 | 196    | 47.5 |
| Do you advise patients to inform you when they feel cold during their hospitalization?                                          | 53    | 12.8 | 195        | 47.2 | 165    | 40   |
| Do you develop and implement care plans for perioperative hypothermia prevention?                                               | 73    | 17.7 | 217        | 52.5 | 123    | 29.8 |
| Do you document the site for temperature measurement in the patients' file?                                                     | 63    | 15.3 | 156        | 37.8 | 194    | 47   |
| Do you maintain ambient room temperature according to the guideline?                                                            | 110   | 26.6 | 214        | 51.8 | 89     | 21.5 |
| Do you assess patients for their risk for perioperative hypothermia?                                                            | 41    | 9.9  | 202        | 48.9 | 170    | 41.2 |
| Do you assess for signs and symptoms of hypothermia?                                                                            | 30    | 7.3  | 159        | 38.5 | 224    | 54.2 |
| Do you advise patients to stay warm prior to surgery?                                                                           | 48    | 11.6 | 185        | 44.8 | 180    | 43.6 |
| Do you include thermoregulation interventions and patient-related care to thermoregulation in your hand-over report             | 41    | 9.9  | 194        | 47   | 178    | 43.1 |

## 278 Factors associated with the level of knowledge on hypothermia prevention

279 In the binary logistic regression, ten of fifteen variables p-value of < 0.2 and were candidates for  
 280 multiple logistic regression. In multiple logistic regression, only three variables were  
 281 significantly associated with knowledge of perioperative hypothermia prevention. In this study,  
 282 being male [AOR = 1.61, 95% CI (1.02-2.53)], an educational level of degree and masters  
 283 [AOR = 2.50; 95% CI (1.25-5.00), 4.39; (1.45-13.20)] respectively, and took training on  
 284 perioperative hypothermia prevention [AOR = 3.68; 95% CI (2.14-6.33)] were significantly  
 285 associated with their knowledge (Table 4).

286 Table 4- Bi-variable and multivariable analysis of factors associated with knowledge of nurses  
 287 on perioperative hypothermia prevention in Amhara Region Referral Hospitals, Northwest  
 288 Ethiopia.

| Variable           | Knowledge of nurses |      | COR (95%CI)     | P-value | AOR (95% CI)    | P-value |
|--------------------|---------------------|------|-----------------|---------|-----------------|---------|
|                    | Good                | Poor |                 |         |                 |         |
| Sex                |                     |      |                 |         |                 |         |
| Female             | 105                 | 95   | 1               |         | 1               |         |
| Male               | 139                 | 74   | 1.69(1.14-2.52) | .009    | 1.61(1.02-2.53) | .038**  |
| Educational status |                     |      |                 |         |                 |         |
| Diploma            | 19                  | 40   | 1               |         | 1               |         |
| Degree             | 191                 | 120  | 3.35(1.85-6.05) | .000    | 2.50(1.25-5.00) | .010**  |
| Master             | 34                  | 9    | 7.95(3.18-19.8) | .000    | 4.39(1.45-13.2) | .008**  |
| Hospital           |                     |      |                 |         |                 |         |
| FHRH               | 67                  | 59   | 1               |         | 1               |         |
| UoGCSRH            | 48                  | 35   | 1.20(.69-2.11)  | .314    | 1.18(.631-2.21) | .601    |
| DMCRH              | 51                  | 22   | 2.04(1.11-3.76) | .056    | 1.74(.863-3.49) | .118    |
| DTCRH              | 33                  | 14   | 2.08(1.01-4.25) | .046    | 2.16(.933-4.94) | .068    |
| TGSRH              | 45                  | 39   | 1.01(.58-1.77)  | .955    | 1.20(.627-2.29) | .581    |

|    |                          |     |     |                 |      |                  |        |
|----|--------------------------|-----|-----|-----------------|------|------------------|--------|
| 1  |                          |     |     |                 |      |                  |        |
| 2  |                          |     |     |                 |      |                  |        |
| 3  |                          |     |     |                 |      |                  |        |
| 4  | Ward                     |     |     |                 |      |                  |        |
| 5  | Emergency                | 52  | 51  | 1               |      | 1                |        |
| 6  | Recovery                 | 31  | 8   | 3.8(1.59-9.05)  | .003 | 2.24(.862-5.84)  | .098   |
| 7  | ICU                      | 34  | 19  | 1.75(.88-3.46)  | .106 | 1.48(.696-3.16)  | .307   |
| 8  | OR                       | 67  | 35  | 1.87(1.07-3.29) | .028 | 1.51(.799-2.86)  | .203   |
| 9  | Orthopedics              | 26  | 20  | 1.27(.63-2.56)  | .496 | 1.35(.641-3.02)  | .402   |
| 10 | Surgical                 | 34  | 36  | .92(.50-1.70)   | .805 | .850(.431-1.67)  | .640   |
| 11 | Monthly salary(ETB)      |     |     |                 |      |                  |        |
| 12 | ≤ 5000                   | 18  | 21  | 1               |      | 1                |        |
| 13 | 5001-7000                | 90  | 74  | 1.41(.7-2.85)   | .477 | 1.10 (.478-2.35) | .885   |
| 14 | 7001-9000                | 107 | 64  | 1.95(.96-3.93)  | .075 | .848(.492-2.49)  | .802   |
| 15 | ≥ 9001                   | 29  | 10  | 3.38(1.3-8.79)  | .010 | 1.53(.507-4.67)  | .447   |
| 16 | Having guideline         |     |     |                 |      |                  |        |
| 17 | No                       | 124 | 168 | 1               |      | 1                |        |
| 18 | Yes                      | 75  | 46  | 1.37(.88-2.1)   | .153 | .848(.490-1.46)  | .555   |
| 19 | Took Training            |     |     |                 |      |                  |        |
| 20 | No                       | 128 | 140 | 1               |      | 1                |        |
| 21 | Yes                      | 116 | 29  | 4.37(2.72-7.01) | .000 | 3.68(2.14-6.33)  | .000** |
| 22 | Reading updated evidence |     |     |                 |      |                  |        |
| 23 | No                       | 106 | 100 | 1               |      | 1                |        |
| 24 | Yes                      | 138 | 69  | 1.88(1.26-2.80) | .002 | 1.32(.834-2.10)  | .234   |
| 25 | Shortage of thermometer  |     |     |                 |      |                  |        |
| 26 | Yes                      | 148 | 120 | 1               |      | 1                |        |
| 27 | No                       | 96  | 49  | 1.58(1.04-2.41) | .031 | 1.27(.776-2.08)  | .325   |
| 28 | Job satisfaction         |     |     |                 |      |                  |        |
| 29 | Unsatisfied              | 100 | 95  | 1               |      | 1                |        |
| 30 | Satisfied                | 144 | 74  | 1.84(1.24-2.74) | .002 | 1.38(.873-2.20)  | .166   |

289 Variables that show significant association during multivariable logistic regression at \*\*p-value  
 290 <0.05, Hosmer and Lemeshow test P=.856, 1=Reference.

### 291 Factors associated with the level of practice on hypothermia prevention

292 In bivariate logistic regression analysis, eleven of sixteen variables were found to have  
 293 significant predictors at a p-value < 0.2 and were candidates for multiple logistic regression. In  
 294 multiple logistic regression only four variables were nurses' significant predictors for the  
 295 practice of nurses on hypothermia prevention at (P<0.05).

296 Nurses who were working in recovery and intensive care units [AOR = 2.87; 95% CI (1.08-7.58),  
 297 and 2.39; 95% CI (1.09-5.22)] respectively, having training related to hypothermia prevention  
 298 [AOR = 2.64; 95% CI (1.53-4.57)],satisfied with their job [AOR 2.15; 95% CI (1.34-3.43)], and  
 299 to have good knowledge of hypothermia [AOR 2.64; 95% CI (1.63-4.27)] were significantly  
 300 associated with their practice (Table 5)

301 Table 5- Bi-variable and multivariable analysis of factors associated with the practice of nurses  
 302 on perioperative hypothermia prevention in Amhara Region Referral Hospitals, Northwest  
 303 Ethiopia.

| Variable           | Practice of nurses |      | COR (95%CI)     | P-value | AOR (95% CI)    | P-value |
|--------------------|--------------------|------|-----------------|---------|-----------------|---------|
|                    | Good               | Poor |                 |         |                 |         |
| Educational status |                    |      |                 |         |                 |         |
| Diploma            | 16                 | 43   | 1               |         | 1               |         |
| Degree             | 159                | 152  | 2.81(1.51-5.20) | .000    | 1.94(.902-4.20) | .089    |
| Master             | 24                 | 19   | 3.39(1.47-7.79) | .002    | 1.28(.411-4.00) | .669    |
| Working ward       |                    |      |                 |         |                 |         |
| Emergency          | 41                 | 62   | 1               |         | 1               |         |
| Recovery           | 30                 | 9    | 5.04(2.1-11.71) | .000    | 2.87(1.08-7.58) | .033**  |
| ICU                | 34                 | 19   | 2.70(1.36-5.37) | .004    | 2.39(1.09-5.22) | .029**  |
| OR                 | 59                 | 43   | 2.07(1.18-3.62) | .010    | 1.63(.856-3.12) | .136    |
| Orthopedics        | 20                 | 26   | 1.16(.575-2.35) | .674    | 1.17(.527-2.62) | .693    |
| Surgical           | 24                 | 46   | .78(.419-1.48)  | .467    | .657(.321-1.34) | .250    |
| Work experience    |                    |      |                 |         |                 |         |
| ≤ 5 years          | 69                 | 88   | 1               |         | 1               |         |



|                              |     |     |                 |      |                 |        |
|------------------------------|-----|-----|-----------------|------|-----------------|--------|
| 6-10                         | 95  | 86  | 1.4(.917-2.16)  | .118 | 1.26(.713-2.23) | .424   |
| 11-15                        | 32  | 25  | 1.63(.886-3.00) | .116 | 1.68(.735-3.86) | .217   |
| ≥ 16                         | 12  | 6   | 2.55(.911-7.14) | .075 | 3.26(.85-12.44) | .083   |
| Monthly salary(ETB)          |     |     |                 |      |                 |        |
| ≤ 5000                       | 17  | 25  | 1               |      | 1               |        |
| 5001-7000                    | 67  | 91  | 1.08(.542-2.16) | .822 | 1.01(.436-2.35) | .976   |
| 7001-9000                    | 98  | 74  | 1.94(.987-3.86) | .057 | 1.26(.517-3.10) | .604   |
| ≥ 9001                       | 26  | 15  | 2.54(1.05-6.17) | .038 | 1.05(.310-3.58) | .933   |
| Having guidelines/ protocol  |     |     |                 |      |                 |        |
| No                           | 131 | 161 | 1               |      | 1               |        |
| Yes                          | 77  | 44  | 2.15(1.39-3.32) | .001 | 1.42(.824-2.47) | .205   |
| Took training                |     |     |                 |      |                 |        |
| No                           | 104 | 164 | 1               |      | 1               |        |
| Yes                          | 104 | 41  | 4.00(2.58-6.19) | .000 | 2.64(1.53-4.57) | .001** |
| Reading updated evidence     |     |     |                 |      |                 |        |
| No                           | 84  | 122 | 1               |      | 1               |        |
| Yes                          | 124 | 83  | 2.17(1.46-3.21) | .000 | 1.37(.853-2.21) | .192   |
| Constraint of thermometer    |     |     |                 |      |                 |        |
| Yes                          | 123 | 145 | 1.67(1.11-2.51) | .014 | 1.10(.661-1.83) | .711   |
| No                           | 85  | 60  | 1               |      | 1               |        |
| Shortage of warming material |     |     |                 |      |                 |        |
| Yes                          | 166 | 176 | 1.53(.914-2.57) | .105 | 1.77(.923-3.39) | .086   |
| No                           | 42  | 29  | 1               |      | 1               |        |
| Job satisfaction             |     |     |                 |      |                 |        |
| Unsatisfied                  | 71  | 124 | 1               |      | 1               |        |
| Satisfied                    | 137 | 81  | 2.95(1.97-4.41) | .000 | 2.15(1.34-3.43) | .001** |
| Knowledge                    |     |     |                 |      |                 |        |
| Good                         | 157 | 87  | 4.17(2.74-6.35) | .000 | 2.64(1.63-4.27) | .000** |
| Poor                         | 51  | 118 | 1               |      | 1               |        |

304 Variables that show significant association during multivariable logistic regression at\*\* p-value  
305 <0.05, Hosmer and Lemeshow test P=.993, 1=Reference.

## 306 **Discussion**

307 The result of this study showed that the overall knowledge of nurses on perioperative  
308 hypothermia prevention was 59.1% with 95% CI (54.7, 63.7). This finding is higher than  
309 previous study conducted in Addis Ababa, Ethiopia(52.1%) (15). The possible reason might be  
310 due to socio-demographic differences, in the previous study most participants had a degree and  
311 diploma level of educational status and the study area was a single setting of trauma center while  
312 in the current study, greater than 10% of the participant had masters and study setting was  
313 multicenter. The other reason might be due to the difference in the time of the study because of  
314 the advancement of technology including updated evidence; educational programs were  
315 increased when the time is more and more recent. So, the participant might have to get more  
316 information regarding the topics. But this finding is much lower than those of studies conducted  
317 in Gambia (82%) (13), Turkey(77.5%) (4), Brazil (81.5%) (14), University of Iowa Hospitals  
318 and Clinics, America (71%) (37), Maryland, America (100%) (38), Ireland (39), and also as  
319 compare to NICE, AORN, and ASPAN guidelines of perioperative hypothermia prevention (3,  
320 17, 40). The possible justification for this difference might be due to the level of staff training,  
321 adopted recommended guidelines, socioeconomic status, and sample size. According to training  
322 on hypothermia prevention in this study, only a few nurses (35.1%) have been trained while in  
323 the comparison group except in Gambia, almost all participants were taking training on  
324 perioperative hypothermia prevention. In terms of using guidelines/protocol, in the studies  
325 conducted in America participants always used recommended guidelines and protocols while in  
326 this study only 29.3% of nurses were report as having guidelines/protocols. According to a  
327 difference in socioeconomic status of the participants as well as the study setting, we Ethiopians  
328 are in a low-income country compared to America, Brazil, and Ireland. This indirectly affects the  
329 quality of healthcare education as well as the healthcare setting. In terms of sample size the  
330 present study has a larger sample size (n=413) as compared to all listed above (in Gambia  
331 (n=53), Turkey (n=200), Brazil (n=21), University of Iowa Hospitals and Clinics, America n=30,  
332 Maryland, America n=19, Ireland n=198).

1  
2  
3 333 In this study, the overall practice of nurses on perioperative hypothermia prevention was 50.4%  
4  
5 334 with 95% CI (45.5-55). This is consistent with the studies done in Addis Ababa, Ethiopia  
6  
7 335 (52.5%) and Durban, South Africa (46%) (15, 16). But this study is higher than the study done in  
8  
9 336 Gambia (19%) (13). The possible reason might be the difference in socio-demographic  
10  
11 337 characteristics like most of the participants in the Gambia had less than five years of experience,  
12  
13 338 and hadn't master's holder participants. On the other hand, the result of this study is much lower  
14  
15 339 when from NICE, AORN, and ASPAN recommendations guidelines (3, 17, 40). This  
16  
17 340 discrepancy could be due to the insufficient availability of warming material, measurement  
18  
19 341 material, and guidelines or protocol or it might be also an inadequate opportunity for frequent  
20  
21 342 training for nurses.

22  
23 343 Regarding the determinants of the level of knowledge on hypothermia prevention, this study has  
24  
25 344 found out that male nurses were found to have more knowledge of hypothermia prevention by  
26  
27 345 1.6 times as compared to females. The reason might be females have an extra workload, most  
28  
29 346 home activities such as bearing and taking care of children, cooking, washing, etc. are mostly  
30  
31 347 done by females (41). So due to being overloaded by other additional home activities, they might  
32  
33 348 not have enough time to scale up their knowledge.

34  
35 349 Nurses who had degrees and masters were more likely to have good knowledge of hypothermia  
36  
37 350 prevention by 2.5 and 4.4 times respectively as compared to those who had a diploma. This  
38  
39 351 finding is supported by studies conducted in Iran(26), and Brazil, educational interventions are  
40  
41 352 fundamental for nurses to guide their team and be the link of technical-scientific knowledge to  
42  
43 353 improve the quality of patient care (14). The possible reason might be that more educated  
44  
45 354 respondents have a higher opportunity of exposure to different courses directly or indirectly  
46  
47 355 related to the prevention of hypothermia.

48  
49 356 Those nurses who received training related to hypothermia prevention were 3.7 and 2.6 times  
50  
51 357 more likely to have good knowledge and practice of hypothermia prevention as compared to  
52  
53 358 their counterparts. This finding is supported by studies in Maryland, America(38), Brazil (42),  
54  
55 359 Iran (26), Turkey(4). The possible reason might be that training plays an important role in  
56  
57 360 improving the quality of patient care. The need to promote the effectiveness of in-site and off-  
58  
59 361 site training of nurses is an invaluable criterion. Training is necessary to update theoretical and  
60  
362 practical knowledge in every aspect of nursing education(41).

1  
2  
3 363 Another finding is nurses who were working in recovery and intensive care units were 2.9 and  
4 364 2.4 times more likely to have good practice respectively as compared to the nurses who were  
5  
6 365 working in the emergency ward. This finding is inconsistent with the study conducted in Turkey,  
7  
8 366 ICU nurses had more knowledge than nurses who were working in other wards but their practice  
9  
10 367 was not changing (4). The possible reason why Recovery and ICU nurses had better practice  
11  
12 368 might be patients admitted to Recovery and ICU wards need close follow-up because of their  
13  
14 369 physiological change/disturbance due to surgery or anesthesia effect. So working in two wards,  
15  
16 370 the nurses perform more activities, which maintain thermoregulation. Another reason might be  
17  
18 371 that the nurse-to-patient ratio is better than other wards, the standard is in recovery one to two,  
19  
20 372 ICU one to one, emergency one to three, and for surgical and orthopedics wards is one to six in  
21  
22 373 Ethiopia. The other reason might be better availability of resources like a thermometer, and  
23  
24 374 warming materials. Also might be most nurses who were working in those two wards took more  
25  
26 375 training than other nurses.

26 376 In this study, nurses who were satisfied with their jobs were 2.2 times more likely to have a good  
27  
28 377 level of practice as compared to those who were not satisfied. Job satisfaction of nurses is highly  
29  
30 378 important in building up employee interest and efficiency, as higher job satisfaction determines  
31  
32 379 better employee performance(43). Therefore, hospital administrators need to work on improving  
33  
34 380 working environments, so that nurses become safe and comfortable to result in a positive feeling  
35  
36 381 towards their job.

37 382 The other significant variable is nurses who have knowledge of hypothermia were 2.6 times  
38  
39 383 more likely to have a good practice as compared to those who hadn't knowledge of hypothermia  
40  
41 384 prevention. This study has supported studies conducted in Nigeria (44) and Textbook of Brunner  
42  
43 385 & Suddarth (45), AORN, surgical team awareness, education, and understanding of the effects of  
44  
45 386 hypothermia are necessary components to change how clinicians provide quality, cost-effective  
46  
47 387 patient care (46).

#### 388 **Strengths and Limitations of the Study**

50 389 A self-reported questionnaire measure of knowledge and practice of nurses on the prevention of  
51  
52 390 perioperative hypothermia is prone to social desirability bias and recall bias. Furthermore, this  
53  
54 391 study was not triangulated with a qualitative method. Despite these limitations, this study covers  
55  
56 392 a large setting (multicenter) area.

### 393 **Conclusion**

394 This study revealed that nurses' knowledge and practice regarding the prevention of perioperative  
395 hypothermia was found to be inadequate as compared to the recommended guidelines. Having a  
396 higher educational status, being male, and attending training showed a positive and significant  
397 association with good knowledge of perioperative hypothermia prevention. Whereas, factors  
398 contributing to practice were working ward, training, job satisfaction, and knowledge of nurses.  
399 Based on the findings of the study, we recommend to the Amhara regional health bureau and  
400 hospital administrators including ward coordinators in collaboration with other stakeholders:  
401 Improve sponsored educational opportunities, especially those nurses who have a diploma,  
402 promote and strengthen in-service training periodically and regularly, better to motivate those  
403 who have knowledge and practiced well, should fulfill the availability of resources like warming  
404 materials, thermometers, and updated guidelines/protocols, better to improve working  
405 environments so that nurses become safe and comfortable to result in a positive feeling towards  
406 their job. Researchers also should do other research for a strong recommendation by adding  
407 observational data collection methods.

### 408 **List of Abbreviation**

409 AOR: Adjusted Odd Ratio; AORN: Association of perioperative Register Nurses; ASPAN:  
410 American Society of PeriAnesthesia Nurses; CI: Confidence Interval; DMRH: Debre Markos  
411 Referral Hospital; DTCRH: Debre Tabor Comprehensive Referral Hospital; EMS: Emergency  
412 Medical Service; EPI INFO: Statistical Package for Epidemiological Information Analysis;  
413 FHRH: Felege Hiwot Referral Hospital; ICU: Intensive Care Unit; IPH: Inadvertent  
414 Perioperative Hypothermia; OR: Odds Ratio; OR: Operation Room; HP: Perioperative  
415 Hypothermia; PI: Principal Investigator; RR: Recovery Room; SPSS: Statistical Package of  
416 Social Science; T° c: Temperature In Degree Centigrade; TGSRH: Tibebe Gion Specialized  
417 Referral Hospital; UK: United Kingdom; UoGCSRH: University of Gondar Comprehensive  
418 Specialized Referral Hospital; USA: United States of America

1  
2  
3 419 **Declaration**

4  
5 420 **Ethical Approval and informed consent to participate**

6 421 The Institutional Ethical Review Board of the University of Gondar approved the study. Ethical  
7  
8 422 clearance was obtained from the board on behalf of the School of Nursing (Ref.  
9  
10 423 No. S/R/164/2/2021). Upon this clearance, additional written permission to conduct the study  
11  
12 424 was obtained from the manager of all five referral hospitals when after explaining the purpose,  
13  
14 425 the possible benefit of the study. Informed written consent was obtained from each respondent  
15  
16 426 before fulfilling the questionnaire. It was explained for the respondents that participated in the  
17  
18 427 study were voluntary and private information would be protected. The processes not identify  
19  
20 428 respondents by their name so; the process was done by keeping the privacy of the respondents.

21 429 **Consent to publish**

22 430 Not applicable

23  
24 431 **Availability of data and materials:**

25 432 All data relevant to the study are included in the article or uploaded as supplementary  
26  
27 433 information

28  
29 434 **Conflicts of Interest**

30 435 The authors declare that they have no conflicts of interest.

31  
32 436 **Funding**

33  
34  
35 437 No funder

36  
37 438 **Authors' contributions**

38  
39 439 Ashenafi Worku carried out the study starting from designing the study, analyzing, interpreting  
40  
41 440 data, and reviewing the manuscript. Bezenaw Yimer Mekkonen, Netsanet Tsegaye, and  
42  
43 441 Endalkachew Dellie participated in revising the measurement tool or questionnaire, proposal  
44  
45 442 writing, data analysis, interpretation, and commenting drafts of the paper and manuscript. All  
46  
47 443 authors involved in writing, reviewing and approving the final draft of the manuscript. All  
48  
49 444 authors read and approved the manuscript before submitting it to the journal for publication.

50  
51 445 **Acknowledgment**

52  
53 446 We would like to thank the University of Gondar, College of Medicine and Health Sciences,  
54  
55 447 School of Nursing, for making this thesis work by giving ethical clearance and assigning

1  
2  
3 448 advisors. We forward our appreciation to the five hospital administrators for allowing us to  
4  
5 449 conduct this research and for their cooperation. Finally, we would like to thank the study  
6  
7 450 participants for their volunteer participation, and data collectors and supervisors for their  
8  
9 451 valuable support and cooperation during data collection.

10 452

11  
12 453 **Reference**13  
14 454 1. Osilla EV, Marsidi JL, Sharma S. Physiology, Temperature Regulation: StatPearls  
15  
16 455 Publishing, Treasure Island (FL); 2020 2020.17  
18 456 2. Giuliano KK, Hendricks J. Inadvertent perioperative hypothermia: current nursing  
19  
20 457 knowledge. AORN journal. 2017;105(5):453-63.21  
22 458 3. NICE. National Institute for Health and Care Excellence Guideline  
23  
24 459 <https://pathways.nice.org.uk/pathways/inadvertent-perioperative-hypothermia>. 2020.25  
26 460 4. Senol T, Yildiz T. Effects of a training programme on the awareness of inadvertent  
27  
28 461 perioperative hypothermia among surgical nurses. Current Health Studies. 2019:27.29  
30 462 5. Mendonça FT, Ferreira JdS, Guilardi VHF, Guimarães GMN. Prevalence of inadvertent  
31  
32 463 perioperative hypothermia and associated factors: a cross-sectional study. Therapeutic  
33  
34 464 Hypothermia and Temperature Management. 2021;11(4):208-15.35  
36 465 6. Mehta OH, Barclay KL. Perioperative hypothermia in patients undergoing major  
37  
38 466 colorectal surgery. ANZ journal of surgery. 2014;84(7-8):550-5.39  
40 467 7. Sari S, Aksoy SM, But A. The incidence of inadvertent perioperative hypothermia in  
41  
42 468 patients undergoing general anesthesia and an examination of risk factors. International journal  
43  
44 469 of clinical practice. 2021;75(6):e14103.45  
46 470 8. Sagiroglu G, Ozturk GA, Baysal A, Turan FN. Inadvertent perioperative hypothermia  
47  
48 471 and important risk factors during major abdominal surgeries. J Coll Physicians Surg Pak.  
49  
50 472 2020;30(2):123-8.51  
52 473 9. Wongyingsinn M, Pookprayoon V. Incidence and associated factors of perioperative  
53  
54 474 hypothermia in adult patients at a university-based, tertiary care hospital in Thailand. BMC  
55  
56 475 anesthesiology. 2023;23(1):1-10.

- 1  
2  
3 476 10. Grote R, Wetz A, Bräuer A, Menzel M. Prewarming according to the AWMF S3  
4 477 guidelines on preventing inadvertent perioperative hypothermia 2014: Retrospective analysis of  
5 478 7786 patients. *Der Anaesthetist*. 2018;67:27-33.
- 8 479 11. Fekede MS, Sahile WA. Research Article Magnitude and associated factors of  
9 480 Perioperative hypothermia in patients who underwent Elective surgery at Tikur Anbessa  
10 481 Specialized Hospital, Addis Ababa, Ethiopia. 2019.
- 13 482 12. Denu ZA, Semple P, Tawuye HY, Kassa AA. Perioperative Hypothermia and Predictors  
14 483 of Intra-Operative Hypothermia among Patients Operated at Gondar university Hospital from  
15 484 March to April 2015. 2015.
- 18 485 13. Jallow O. Nurses awareness and practice of perioperative hypothermia prevention 2020.
- 20 486 14. de Souza A PS, Montezello D, . Knowledge of surgical center nursing professionals on  
21 487 hypothermia in surgical oncology patients. *Rev Sobecc*. 2017;22(4):188-92.
- 24 488 15. TIGIST G. knowledge, practice and associated factors on hypothermia prevention of  
25 489 Nurses among <http://etd.aau.edu.et/handle/123456789/21258>. 2019.
- 27 490 16. Nel MJ, Hardcastle TC. Preventative measures taken against hypothermia in selected  
28 491 Durban hospitals' emergency centres and operating theatres. *African journal of emergency  
29 492 medicine : Revue africaine de la medecine d'urgence*. 2017;7(4):172-6.
- 32 493 17. Bashaw MA. Guideline Implementation: Preventing Hypothermia. *AORN Journal*.  
33 494 2016;103(3):304-13.
- 36 495 18. Torossian A, Bräuer A, Höcker J, Bein B, Wulf H, Horn E-P. Preventing inadvertent  
37 496 perioperative hypothermia. *Dtsch Arztebl Int*. 2015;112(10):166-72.
- 39 497 19. Putnam K. Prevention of unplanned patient hypothermia. *AORN journal*.  
40 498 2015;102(4):P11-P2.
- 43 499 20. Cohen S, Hayes JS, Tordella T, Puente I. Thermal efficiency of prewarmed cotton,  
44 500 reflective, and forced—warm-air inflatable blankets in trauma patients. *International Journal of  
45 501 Trauma Nursing*. 2002;8(1):4-8.
- 48 502 21. Mooney B. Prevention of perioperative hypothermia.
- 50 503 22. Geiger TM, Horst S, Muldoon R, Wise PE, Enrenfeld J, Poulouse B, et al. Perioperative  
51 504 core body temperatures effect on outcome after colorectal resections. *The American Surgeon*.  
52 505 2012;78(5):607-12.



- 1  
2  
3 506 23. Burns SM, Wojnakowski M, Piotrowski K, Caraffa G. Unintentional hypothermia:  
4 507 implications for perianesthesia nurses. *Journal of PeriAnesthesia Nursing*. 2009;24(3):167-76.  
5  
6 508 24. Wagner DV. Unplanned perioperative hypothermia. *Aorn j*. 2006;83(2):470, 3-6.  
7  
8 509 25. Billeter AT, Hohmann SF, Druen D, Cannon R, Polk Jr HC. Unintentional perioperative  
9 510 hypothermia is associated with severe complications and high mortality in elective operations.  
10 511 *Surgery*. 2014;156(5):1245-52.  
11  
12 512 26. Pourrezaei S, Dinmohammadi M, Jafarirouhi A. The Effect of Thermal Care Workshop  
13 513 on EMS Staff Readiness in managing Accidental Hypothermia in Trauma Patients. *Preventive*  
14 514 *Care in Nursing and Midwifery Journal*. 2018;8(2):26-33.  
15  
16 515 27. Evans J, Kenkre J. Current practice and knowledge of nurses regarding patient  
17 516 temperature measurement. *Journal of medical engineering & technology*. 2006;30(4):218-23.  
18  
19 517 28. Bayleyegn B, Mehari A, Damtie D, Negash M. Knowledge, Attitude and Practice on  
20 518 Hospital-Acquired Infection Prevention and Associated Factors Among Healthcare Workers at  
21 519 University of Gondar Comprehensive Specialized Hospital, Northwest Ethiopia. *Infection and*  
22 520 *Drug Resistance*. 2021;14:259.  
23  
24 521 29. Yalew ZM, Zeleke H, Afenigus AD, Yitayew YA, Minuye B, Kassahun SA. Patient  
25 522 Experience in Nursing Care and Associated Factors Among Adult Admitted Patients in Debre  
26 523 Markos and Dessie Referral Hospitals, Amhara Region, Ethiopia, 2019. *Journal of Patient*  
27 524 *Experience*. 2020:2374373520966817.  
28  
29 525 30. Engidaw MT, Gebremariam AD, Tiruneh SA, Asnakew DT, Abate BA. Chronic energy  
30 526 deficiency and its associated factors among lactating women in Debre Tabor general hospital,  
31 527 Northcentral Ethiopia. *Journal of Family Medicine and Health Care*. 2019;5(1):1-7.  
32  
33 528 31. Ayalew E, Workineh Y. Nurses' intention to leave their job and associated factors in  
34 529 Bahir Dar, Amhara Region, Ethiopia, 2017. *BMC nursing*. 2020;19:1-7.  
35  
36 530 32. Tarekegn F, Asfaw G, Mossie M. Perioperative mortality at Tibebe Ghion Specialized  
37 531 Teaching Hospital, Ethiopia: A longitudinal study design. *International Journal of Surgery Open*.  
38 532 2020;26:81-5.  
39  
40 533 33. Ireland S, Murdoch K, Ormrod P, Saliba E, Endacott R, Fitzgerald M, et al. Nursing and  
41 534 medical staff knowledge regarding the monitoring and management of accidental or exposure  
42 535 hypothermia in adult major trauma patients. *International journal of nursing practice*.  
43 536 2006;12(6):308-18.

- 1  
2  
3 537 34. Harper CM. Clinical Approaches to the Prevention of Inadvertent Perioperative  
4 538 Hypothermia: University of Portsmouth; 2016.
- 5 539 35. Health Nif, Excellence. C. Hypothermia: prevention and management in adults having  
6 540 surgery. Clinical guideline [CG65]. 2016.
- 7 541 36. Ayalew F, Kibwana S, Shawula S, Misganaw E, Abosse Z, Van Roosmalen J, et al.  
8 542 Understanding job satisfaction and motivation among nurses in public health facilities of  
9 543 Ethiopia: a cross-sectional study. BMC nursing. 2019;18(1):1-13.
- 10 544 37. Block J, Lilienthal M, Cullen L, White A. Evidence-based thermoregulation for adult  
11 545 trauma patients. Critical care nursing quarterly. 2012;35(1):50-63.
- 12 546 38. Tamrakar P. Preventing Intraoperative and Postoperative Hypothermia. 2021.
- 13 547 39. Hegarty J, Walsh E, Burton A, Murphy S, O'gorman F, McPolin G. Nurses' knowledge of  
14 548 inadvertent hypothermia. Aorn Journal. 2009;89(4):701-13.
- 15 549 40. SELECTED WS. American Society of PeriAnesthesia Nurses Clinical guideline for the  
16 550 prevention of unplanned perioperative hypothermia [http://www.aspan.org/PDFfiles/HYPOTHERMIA\\_](http://www.aspan.org/PDFfiles/HYPOTHERMIA_GUIDELINE10-02.pdf)  
17 551 [GUIDELINE10-02.pdf](http://www.aspan.org/PDFfiles/HYPOTHERMIA_GUIDELINE10-02.pdf) Centers for Disease Control and  
18 552 Prevention Guideline for prevention of surgical site infection, 1999 [http://www.cdc.gov/ncidod/dhqp/gl\\_surgicalsites.html](http://www.cdc.gov/ncidod/dhqp/gl_surgicalsites.html) Institute for Healthcare Improvement [http://www.ihc.org/IHI/Programs/Campaign Surgical Care Improvement Project](http://www.ihc.org/IHI/Programs/CampaignSurgicalCareImprovementProject) <http://www.medqic.org/scip>.  
19 553 Last accessed on May. 2006;4.
- 20 554 41. Chaghari M, Saffari M, Ebadi A, Ameryoun A. Empowering education: A new model for  
21 555 in-service training of nursing staff. Journal of advances in medical education & professionalism.  
22 556 2017;5(1):26.
- 23 557 42. de Araujo Püschel VA. Knowledge of hypothermia in nursing professionals of surgical  
24 558 center. Revista da Escola de Enfermagem da USP. 2012;46(1):123-9.
- 25 559 43. Geleto A, Baraki N, Atomsa GE, Dessie Y. Job satisfaction and associated factors among  
26 560 health care providers at public health institutions in Harari region, eastern Ethiopia: a cross-  
27 561 sectional study. BMC research notes. 2015;8(1):1-7.
- 28 562 44. Oyira EJ, Ella R, Chukwudi UE, Paulina AI. Knowledge Practice and Outcome of  
29 563 Quality Nursing Care among Nurses in University of Calabar Teaching Hospital (UCTH).  
30 564 Journal of Education and Training Studies. 2016;4(11):179-93.
- 31  
32  
33  
34  
35  
36  
37  
38  
39  
40  
41  
42  
43  
44  
45  
46  
47  
48  
49  
50  
51  
52  
53  
54  
55  
56  
57  
58  
59  
60

1  
2  
3 567 45. Hinkle JL, Cheever KH. Brunner and Suddarth's textbook of medical-surgical nursing:  
4 568 Wolters kluwer india Pvt Ltd; 2018.

5 569 46. Link T. Guidelines in Practice: Hypothermia Prevention. . AORN journal 2020  
6 570 Jun;;111(6):653-66.

7  
8  
9  
10 571 **Table legend:**

11  
12  
13 572 **Supplemental Table:** Institutional and other related factors of the respondents on perioperative  
14 573 hypothermia prevention in Amhara Regional State Referral Hospitals, Northwest Ethiopia, 2021  
15 574 (N=413).

16  
17  
18  
19  
20 575 **Figure legend:**

21 576 **Supplemental Figure:** Schematic presentation of sampling procedure of nurses' knowledge and  
22 577 practice, and associated factors on hypothermia prevention among surgical patients.

23  
24  
25 578

Supplemental Table: Institutional and other related factors of the respondents on perioperative hypothermia prevention in Amhara Regional State Referral Hospitals, Northwest Ethiopia, 2021 (N=413).

| Variable                                           | Response         | Frequency (N=413) | Percentage (%) |
|----------------------------------------------------|------------------|-------------------|----------------|
| Working place (hospital)                           | TGSRH            | 84                | 20.3           |
|                                                    | UoGCSRH          | 83                | 20.1           |
|                                                    | DMCRH            | 73                | 17.7           |
|                                                    | DTCRH            | 47                | 11.4           |
|                                                    | FHRH             | 126               | 30.5           |
| Ward:                                              | Emergency        | 103               | 24.9           |
|                                                    | Recovery         | 39                | 9.4            |
|                                                    | OR               | 102               | 24.7           |
|                                                    | ICU              | 53                | 12.8           |
|                                                    | Orthopedics ward | 46                | 11.1           |
|                                                    | Surgical ward    | 70                | 16.9           |
| Daily working hours                                | ≤ 8 hrs.         | 354               | 85.7           |
|                                                    | ≥9 hrs.          | 59                | 14.3           |
| Training on hypothermia prevention                 | Yes              | 145               | 35.1           |
|                                                    | No               | 268               | 64.9           |
| Presence of protocol/guideline                     | Yes              | 121               | 29.3           |
|                                                    | No               | 292               | 70.7           |
| Reading updated evidence on hypothermia prevention | Yes              | 206               | 49.9           |
|                                                    | No               | 207               | 50.1           |

| Variable                        | Response     | Frequency (N=413) | Percentage (%) |
|---------------------------------|--------------|-------------------|----------------|
| Availability of thermometer     | Yes          | 145               | 35.1           |
|                                 | No           | 268               | 64.9           |
| Constraints of warming material | Yes          | 342               | 82.8           |
|                                 | No           | 71                | 17.2           |
| Shortage of blanket             | Yes          | 166               | 40.2           |
|                                 | No           | 247               | 59.8           |
| Shortage of linens              | Yes          | 89                | 21.5           |
|                                 | No           | 324               | 78.5           |
| Shortage of fluid warmer        | Yes          | 132               | 32.0           |
|                                 | No           | 281               | 68.0           |
| Shortage of air warmer/heater   | Yes          | 212               | 51.3           |
|                                 | No           | 201               | 48.7           |
| Shortage of warmer blanket      | Yes          | 217               | 52.5           |
|                                 | No           | 196               | 47.5           |
| Job satisfaction                | Satisfied    | 217               | 52.5           |
|                                 | Dissatisfied | 196               | 47.5           |

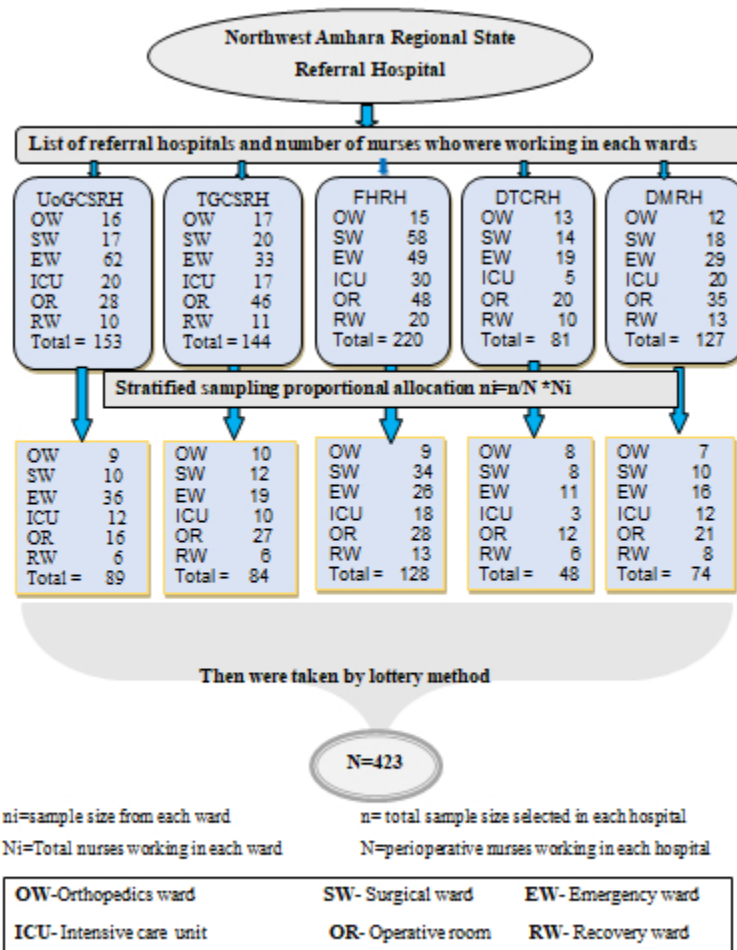

Supplemental Figure: Schematic presentation of sampling procedure of nurses' knowledge and practice, and associated factors on hypothermia prevention among surgical patients.

315x352mm (38 x 38 DPI)

**STROBE Statement—checklist of items that should be included in reports of observational studies**

|                           | <b>Item No.</b> | <b>Recommendation</b>                                                                               | <b>Page No.</b> | <b>Relevant text from manuscript</b>                                                                                                                                                                                                             |
|---------------------------|-----------------|-----------------------------------------------------------------------------------------------------|-----------------|--------------------------------------------------------------------------------------------------------------------------------------------------------------------------------------------------------------------------------------------------|
| <b>Title and abstract</b> | 1               | (a) Indicate the study's design with a commonly used term in the title or the abstract              | 1               | Line (1-3); An institution-based cross-sectional study was conducted for the title of Knowledge and Practice of nurses regarding Perioperative Hypothermia Prevention at Northwest Amhara Regional State Referral Hospitals, Northwest Ethiopia: |
|                           |                 | (b) Provide in the abstract an informative and balanced summary of what was done and what was found | 2               | Lines (27 – 50); Abstract                                                                                                                                                                                                                        |
| <b>Introduction</b>       |                 |                                                                                                     |                 |                                                                                                                                                                                                                                                  |
| Background/rationale      | 2               | Explain the scientific background and rationale for the investigation being reported                | 3 and 4         | Lines (57 – 118); Introduction                                                                                                                                                                                                                   |
| Objectives                | 3               | State-specific objectives, including any pre-specified hypotheses                                   | 4               | Lines (116 – 118); This study aimed to assess nurses' knowledge, practice, and their determinant factors of perioperative hypothermia prevention in Northwest Amhara Regional State Referral Hospitals, Northwest Ethiopia.                      |
| <b>Methods</b>            |                 |                                                                                                     |                 |                                                                                                                                                                                                                                                  |
| Study design              | 4               | Present key elements of study design early in the paper                                             | 4               | Lines (120 – 122); Institutional based cross-sectional study was conducted in perioperative units/wards of five referral hospitals from March 25-May 20/2021.                                                                                    |
| Setting                   | 5               | Describe the setting, locations, and relevant dates,                                                | 5               | Lines (123 – 140); Study setting                                                                                                                                                                                                                 |

|                           |   |                                                                                                                                                                                                                                                                                                                                                                                                                                                              |            |                                                                                                                                                                                                                                                                                              |
|---------------------------|---|--------------------------------------------------------------------------------------------------------------------------------------------------------------------------------------------------------------------------------------------------------------------------------------------------------------------------------------------------------------------------------------------------------------------------------------------------------------|------------|----------------------------------------------------------------------------------------------------------------------------------------------------------------------------------------------------------------------------------------------------------------------------------------------|
|                           |   | including periods of recruitment, exposure, follow-up, and data collection                                                                                                                                                                                                                                                                                                                                                                                   |            |                                                                                                                                                                                                                                                                                              |
| Participants              | 6 | <p>(a) Cohort study—Give the eligibility criteria, and the sources and methods of selection of participants. Describe methods of follow-up</p> <p>Case-control study—Give the eligibility criteria, and the sources and methods of case ascertainment and control selection. Give the rationale for the choice of cases and controls</p> <p>Cross-sectional study—Give the eligibility criteria and the sources and methods of selection of participants</p> | 5,6, and 7 | <p>Lines (141 – 148); Source and study population</p> <p>Lines (164 – 175); A total of 423 nurses were selected through a stratified random sampling technique, and data was collected from 413 nurses.</p> <p>Lines (176– 182); Inclusion and exclusion criteria (eligibility criteria)</p> |
|                           |   | <p>(b) Cohort study—For matched studies, give matching criteria and number of exposed and unexposed</p> <p>Case-control study—For matched studies, give matching criteria and the number of controls per case</p>                                                                                                                                                                                                                                            | N/A        | This was a cross-sectional study                                                                                                                                                                                                                                                             |
| Variables                 | 7 | Clearly define all outcomes, exposures, predictors, potential confounders, and effect modifiers. Give diagnostic criteria, if applicable                                                                                                                                                                                                                                                                                                                     | 7          | Lines (183 – 199); Operational definition of variables                                                                                                                                                                                                                                       |
| Data sources/ measurement | 8 | For each variable of interest, give sources of data and details of methods of assessment (measurement). Describe comparability of assessment methods if there is more than one group                                                                                                                                                                                                                                                                         | 7 and 8    | Lines (200 – 211); Data collection tools and procedures                                                                                                                                                                                                                                      |
| Bias                      | 9 | Describe any efforts to address potential sources of bias                                                                                                                                                                                                                                                                                                                                                                                                    | 8          | Lines (212–221); To maintain data quality training was given to data collectors and supervisors. The questionnaire was pretested among 5% of the sample size. Quality was also maintained by                                                                                                 |



|                        |    |                                                                                                                                                                                                                                                                                           |         |                                                                                                                                                                                                                                                                                                                                                                                                                                                              |
|------------------------|----|-------------------------------------------------------------------------------------------------------------------------------------------------------------------------------------------------------------------------------------------------------------------------------------------|---------|--------------------------------------------------------------------------------------------------------------------------------------------------------------------------------------------------------------------------------------------------------------------------------------------------------------------------------------------------------------------------------------------------------------------------------------------------------------|
|                        |    |                                                                                                                                                                                                                                                                                           |         | close monitoring of the procedure, and checking on the completeness of the data on-site by the responsibility of supervisors and the principal investigator.                                                                                                                                                                                                                                                                                                 |
| Study size             | 10 | Explain how the study size was arrived at                                                                                                                                                                                                                                                 | 5 and 6 | Lines (149–163); The sample size was determined by using a formula to estimate a single population proportion with the assumption of a 95% level of confidence, 50% proportion, and a 5% marginal error.                                                                                                                                                                                                                                                     |
| Quantitative variables | 11 | Explain how quantitative variables were handled in the analyses. If applicable, describe which groupings were chosen and why                                                                                                                                                              | 9       | Lines (228–233); Binary logistic regression was used to determine the significant association between the independent and dependent variables. Those independent variables, which are less than 0.2 in bivariate analysis, were entered into multivariable logistic regressions. Association between the independent variable and dependent variable was considered significant if P-value was less than 0.05 from multivariate logistic regression analysis |
| Statistical methods    | 12 | (a) Describe all statistical methods, including those used to control for confounding                                                                                                                                                                                                     | 8       | Lines (222–233); Statistical Analysis                                                                                                                                                                                                                                                                                                                                                                                                                        |
|                        |    | (b) Describe any methods used to examine subgroups and interactions                                                                                                                                                                                                                       | N/A     | There were no subgroups                                                                                                                                                                                                                                                                                                                                                                                                                                      |
|                        |    | (c) Explain how missing data were addressed                                                                                                                                                                                                                                               | N/A     | There was no missing data                                                                                                                                                                                                                                                                                                                                                                                                                                    |
|                        |    | (d) Cohort study—If applicable, explain how loss to follow-up was addressed<br><br>Case-control study—If applicable, explain how matching of cases and controls was addressed<br><br>Cross-sectional study—If applicable, describe analytical methods taking account of sampling strategy | 6       | Lines (164– 175); A total of 423 nurses were selected through a stratified random sampling technique, and data was collected from them                                                                                                                                                                                                                                                                                                                       |

|                  |     |                                                                                                                                                                                                   |          |                                                                                                                                                                                                                                                                                                                                            |
|------------------|-----|---------------------------------------------------------------------------------------------------------------------------------------------------------------------------------------------------|----------|--------------------------------------------------------------------------------------------------------------------------------------------------------------------------------------------------------------------------------------------------------------------------------------------------------------------------------------------|
|                  |     | (e) Describe any sensitivity analyses                                                                                                                                                             | N/A      |                                                                                                                                                                                                                                                                                                                                            |
| <b>Results</b>   |     |                                                                                                                                                                                                   |          |                                                                                                                                                                                                                                                                                                                                            |
| Participants     | 13* | (a) Report numbers of individuals at each stage of study—eg numbers potentially eligible, examined for eligibility, confirmed eligible, included in the study, completing follow-up, and analysed | N/A      | This was a cross-sectional study with only one stage.                                                                                                                                                                                                                                                                                      |
|                  |     | (b) Give reasons for non-participation at each stage                                                                                                                                              | N/A      |                                                                                                                                                                                                                                                                                                                                            |
|                  |     | (c) Consider use of a flow diagram                                                                                                                                                                | N/A      |                                                                                                                                                                                                                                                                                                                                            |
| Descriptive data | 14* | (a) Give characteristics of study participants (eg demographic, institutional, other) and information on exposures and potential confounders                                                      | 9 and 10 | Line (238-243); Table 1: Socio-demographic characteristics of the study participants on hypothermia prevention among perioperative patients in Amhara Regional State Referral Hospitals, Northwest Ethiopia, 2021(N=413).<br><br>Line (248-254); <b>Institutional and job-related factors of the respondents</b> of the study participants |
|                  |     | (b) Indicate number of participants with missing data for each variable of interest                                                                                                               | N/A      | There was no missing data                                                                                                                                                                                                                                                                                                                  |
|                  |     | (c) Cohort study—Summarise follow-up time (eg, average and total amount)                                                                                                                          | N/A      | This was a cross-sectional study                                                                                                                                                                                                                                                                                                           |
| Outcome data     | 15* | Cohort study—Report numbers of outcome events or summary measures over time                                                                                                                       | N/A      | This was cross-sectional study                                                                                                                                                                                                                                                                                                             |
|                  |     | Case-control study—Report numbers in each exposure category, or summary measures of exposure                                                                                                      | N/A      | This was a cross-sectional study                                                                                                                                                                                                                                                                                                           |

|                   |    |                                                                                                                                                                                                              |                    |                                                                                                                                                                                                                                                                                                                                                                                                                                                                                                                                                                                                                                                                                            |
|-------------------|----|--------------------------------------------------------------------------------------------------------------------------------------------------------------------------------------------------------------|--------------------|--------------------------------------------------------------------------------------------------------------------------------------------------------------------------------------------------------------------------------------------------------------------------------------------------------------------------------------------------------------------------------------------------------------------------------------------------------------------------------------------------------------------------------------------------------------------------------------------------------------------------------------------------------------------------------------------|
|                   |    | Cross-sectional study—Report numbers of outcome events or summary measures                                                                                                                                   | 10, 12, and 13     | <p>Lines (257–258); In this study, 244 (59.1%) with 95% CI: (54.7, 63.7) of the participants had good knowledge</p> <p>Lines (269–270); In this study, 208 (50.4%) with 95% CI: (45.5, 55) of the participants had good practice.</p>                                                                                                                                                                                                                                                                                                                                                                                                                                                      |
| Main results      | 16 | (a) Give unadjusted estimates and, if applicable, confounder-adjusted estimates and their precision (eg, 95% confidence interval). Make clear which confounders were adjusted for and why they were included | 10, 12, 13, and 20 | <p>Lines (257-258); In this study, 244 (59.1%) with 95% CI: (54.7, 63.7) of the participants had good knowledge</p> <p>Lines (269-270); In this study, 208 (50.4%) with 95% CI: (45.5, 55) of the participants had a good practice.</p> <p>Lines (288-290); Table 4- Bi-variable and multivariable analysis of factors associated with knowledge of nurses on perioperative hypothermia prevention in Amhara Region Referral Hospitals, Northwest Ethiopia.</p> <p>Lines (303-305); Table 5- Bi-variable and multivariable analysis of factors associated with the practice of nurses on perioperative hypothermia prevention in Amhara Region Referral Hospitals, Northwest Ethiopia.</p> |
|                   |    | (b) Report category boundaries when continuous variables were categorized                                                                                                                                    | N/A                | There was no continuous variable.                                                                                                                                                                                                                                                                                                                                                                                                                                                                                                                                                                                                                                                          |
|                   |    | (c) If relevant, consider translating estimates of relative risk into absolute risk for a meaningful time period                                                                                             | N/A                | There was no estimate of relative risk.                                                                                                                                                                                                                                                                                                                                                                                                                                                                                                                                                                                                                                                    |
| Other analyses    | 17 | Report other analyses done—eg analyses of subgroups and interactions, and sensitivity analyses                                                                                                               | N/A                | There was no sub groups and sensitivity analysis.                                                                                                                                                                                                                                                                                                                                                                                                                                                                                                                                                                                                                                          |
| <b>Discussion</b> |    |                                                                                                                                                                                                              |                    |                                                                                                                                                                                                                                                                                                                                                                                                                                                                                                                                                                                                                                                                                            |

|                          |    |                                                                                                                                                                            |       |                                                                                                                                                                                                                                                                                                                                                                                                                                                                                                        |
|--------------------------|----|----------------------------------------------------------------------------------------------------------------------------------------------------------------------------|-------|--------------------------------------------------------------------------------------------------------------------------------------------------------------------------------------------------------------------------------------------------------------------------------------------------------------------------------------------------------------------------------------------------------------------------------------------------------------------------------------------------------|
| Key results              | 18 | Summarise key results with reference to study objectives                                                                                                                   | 19-22 | Lines (308–389); Discussion                                                                                                                                                                                                                                                                                                                                                                                                                                                                            |
| Limitations              | 19 | Discuss limitations of the study, taking into account sources of potential bias or imprecision. Discuss both direction and magnitude of any potential bias                 | 22    | Lines (391–393); A self-reported questionnaire measure of knowledge and practice of nurses on the prevention of perioperative hypothermia is prone to social desirability bias and recall bias. Furthermore, this study was not triangulated with a qualitative method.                                                                                                                                                                                                                                |
| Interpretation           | 20 | Give a cautious overall interpretation of results considering objectives, limitations, multiplicity of analyses, results from similar studies, and other relevant evidence | 19-22 | Lines (308-394); Discussion and limitation and strength                                                                                                                                                                                                                                                                                                                                                                                                                                                |
| Generalizability         | 21 | Discuss the generalizability (external validity) of the study results                                                                                                      | 22    | Lines (395-409); This study revealed that nurses' knowledge and practice regarding the prevention of perioperative hypothermia was found to be inadequate as compared to the recommended guidelines. Having higher educational status, being male, and attending training showed a positive and significant association with good knowledge of perioperative hypothermia prevention. Whereas, factors contributing to practice were working ward, training, job satisfaction, and knowledge of nurses. |
| <b>Other information</b> |    |                                                                                                                                                                            |       |                                                                                                                                                                                                                                                                                                                                                                                                                                                                                                        |
| Funding                  | 22 | Give the source of funding and the role of the funders for the present study and, if applicable, for the original study on which the present article is based              | 24    | Lines (439)-This research received no specific grant from any funding agency in the public, commercial, or not-for-profit sectors.                                                                                                                                                                                                                                                                                                                                                                     |

\*Give information separately for cases and controls in case-control studies and, if applicable, for exposed and unexposed groups in cohort and cross-sectional studies.

# BMJ Open

## Knowledge and practice of nurses with respect to perioperative hypothermia prevention in the Northwest Amhara Regional State Referral Hospitals, Ethiopia: a cross-sectional study

|                                 |                                                                                                                                                                                                                                                                                                                                                                                                                                                      |
|---------------------------------|------------------------------------------------------------------------------------------------------------------------------------------------------------------------------------------------------------------------------------------------------------------------------------------------------------------------------------------------------------------------------------------------------------------------------------------------------|
| Journal:                        | <i>BMJ Open</i>                                                                                                                                                                                                                                                                                                                                                                                                                                      |
| Manuscript ID                   | bmjopen-2022-068131.R3                                                                                                                                                                                                                                                                                                                                                                                                                               |
| Article Type:                   | Original research                                                                                                                                                                                                                                                                                                                                                                                                                                    |
| Date Submitted by the Author:   | 17-Nov-2023                                                                                                                                                                                                                                                                                                                                                                                                                                          |
| Complete List of Authors:       | Woretaw, Ashenafi; University of Gondar College of Medicine and Health Sciences, Surgical Nursing Department<br>Yimer Mekkonen, Bezenaw; University of Gondar, Emergency and Critical Care Nursing Department<br>Tsegaye, Netsanet; University of Gondar College of Medicine and Health Sciences, Emergency and Critical Care nursing<br>Dellie, Endalkachew; University of Gondar College of Medicine and Health Sciences, Health System and policy |
| <b>Primary Subject Heading</b>: | Nursing                                                                                                                                                                                                                                                                                                                                                                                                                                              |
| Secondary Subject Heading:      | Surgery, Nutrition and metabolism                                                                                                                                                                                                                                                                                                                                                                                                                    |
| Keywords:                       | NUTRITION & DIETETICS, PAIN MANAGEMENT, SURGERY                                                                                                                                                                                                                                                                                                                                                                                                      |
|                                 |                                                                                                                                                                                                                                                                                                                                                                                                                                                      |

SCHOLARONE™  
Manuscripts



I, the Submitting Author has the right to grant and does grant on behalf of all authors of the Work (as defined in the below author licence), an exclusive licence and/or a non-exclusive licence for contributions from authors who are: i) UK Crown employees; ii) where BMJ has agreed a CC-BY licence shall apply, and/or iii) in accordance with the terms applicable for US Federal Government officers or employees acting as part of their official duties; on a worldwide, perpetual, irrevocable, royalty-free basis to BMJ Publishing Group Ltd ("BMJ") its licensees and where the relevant Journal is co-owned by BMJ to the co-owners of the Journal, to publish the Work in this journal and any other BMJ products and to exploit all rights, as set out in our [licence](#).

The Submitting Author accepts and understands that any supply made under these terms is made by BMJ to the Submitting Author unless you are acting as an employee on behalf of your employer or a postgraduate student of an affiliated institution which is paying any applicable article publishing charge ("APC") for Open Access articles. Where the Submitting Author wishes to make the Work available on an Open Access basis (and intends to pay the relevant APC), the terms of reuse of such Open Access shall be governed by a Creative Commons licence – details of these licences and which [Creative Commons](#) licence will apply to this Work are set out in our licence referred to above.

Other than as permitted in any relevant BMJ Author's Self Archiving Policies, I confirm this Work has not been accepted for publication elsewhere, is not being considered for publication elsewhere and does not duplicate material already published. I confirm all authors consent to publication of this Work and authorise the granting of this licence.

1  
2  
3  
4 1 **Knowledge and practice of nurses with respect to perioperative**  
5  
6  
7 2 **hypothermia prevention in the Northwest Amhara Regional State**  
8  
9  
10 3 **Referral Hospitals, Ethiopia: a cross-sectional study**  
11  
12

13 4 Ashenafi Worku Woretaw<sup>1</sup>, Bezenaw Yimer Mekkonen <sup>2</sup>, Netsanet Tsegaye<sup>2</sup>, and Endalkachew  
14  
15 5 Dellie<sup>3</sup>  
16  
17

18 6 <sup>1</sup>Department of Surgical Nursing, School of Nursing, College of Medicine and Health Sciences,  
19  
20  
21 7 University of Gondar, Gondar, Ethiopia  
22

23 8 <sup>2</sup>Department of Emergency and Critical Care Nursing, School of Nursing, College of Medicine  
24  
25  
26 9 and Health Sciences, University of Gondar, Gondar, Ethiopia  
27

28 10 <sup>3</sup>Department of Health Systems and Policy, Institute of Public Health, College of Medicine and  
29  
30  
31 11 Health Sciences, University of Gondar, Gondar, Ethiopia  
32

33 12 **Email addresses:**  
34

35 13 Ashenafi Worku Woretaw (AWW): [ashuw2007@gmail.com](mailto:ashuw2007@gmail.com) or [Ashenafi.Worku@uog.edu.et](mailto:Ashenafi.Worku@uog.edu.et)  
36  
37

38 14 Bezenaw Yimer Mekkonen (BY): [bezyim2007@gmail.com](mailto:bezyim2007@gmail.com)  
39  
40

41 15 Netsanet Tsegaye (NT): [netsanet.gondar@gmail.com](mailto:netsanet.gondar@gmail.com)  
42  
43

44 16 Endalkachew Dellie (ED): [endalkd.07@gmail.com](mailto:endalkd.07@gmail.com)  
45  
46

47 17 **\*Correspondence to:**  
48  
49

50 18 Ashenafi Worku Woretaw  
51

52 19 PO Box 196, University of Gondar, Gondar, Ethiopia  
53

54 20 [ashuw2007@gmail.com](mailto:ashuw2007@gmail.com)  
55  
56  
57  
58  
59  
60

21

## 22 Abstract

23 **Objectives** It has been reported that maintaining a normal body temperature among surgical  
24 patients can reduce the length of hospitalization by up to 40%, decrease the risk of surgical site  
25 infection by 64%, and reduce mortality fourfold. Nurses are primarily responsible for preventing  
26 the occurrence of hypothermia among surgical patients. This study assessed nurses' knowledge  
27 and practices with respect to perioperative hypothermia prevention in Northwest Ethiopia, and  
28 investigated the factors associated with good knowledge and practice.

29 **Design** Cross-sectional study.

30 **Setting** Northwest Amhara Regional State Referral Hospitals, Northwest Ethiopia, March 25 to  
31 May 20, 2021.

32 **Participants** 413 nurses working in the perioperative units of five referral hospitals.

33 **Outcome measures** Perioperative hypothermia prevention knowledge and practice among  
34 nurses.

35 **Results** Nearly three-fifths (59.1%; 95% CI: 54.7-63.7) of respondents had good knowledge and  
36 about half (50.4%; 95% CI: 45.5 - 55.0) good practice with respect to perioperative hypothermia  
37 prevention. Factors associated with nurses' knowledge of prevention of perioperative  
38 hypothermia included male sex (AOR: 1.61, 95% CI: 1.02-2.53), having a bachelor's degree  
39 (AOR: 2.50, 95% CI: 1.25-5.00), having a master's degree (AOR: 4.39, 95% CI: 1.45-13.20),  
40 and training participation (AOR: 3.68, 95% CI: 2.14-6.33). Factors associated with nurses'  
41 practice of prevention of perioperative hypothermia included working in recovery (AOR: 2.87,  
42 95% CI: 1.08-7.58) and intensive care units (AOR: 2.39, 95% CI: 1.09-5.22), training



1  
2  
3 43 participation (AOR: 2.64, 95% CI: 1.53-4.57), being satisfied with their job (AOR: 2.15, 95%  
4  
5 44 CI: 1.34-3.43), and having good knowledge (AOR: 2.64, 95% CI: 1.63-4.27).  
6  
7

8 45 **Conclusion** Nurses' knowledge and practice in the prevention of perioperative hypothermia were  
9  
10 46 inadequate. Hospital managers need to design and strengthen training programs and work to  
11  
12 47 enhance job satisfaction.  
13

14  
15 48 **Keywords:** Perioperative hypothermia, Ethiopia, Knowledge, Practice, Nurses.  
16  
17

### 18 49 **Strengths and limitations of this study**

- 20 50 ■ This cross-sectional study used a stratified random sampling method and had a high  
21  
22 51 response rate.
- 23  
24 52 ■ The study might be prone to social desirability bias, although this was minimized through  
25  
26 53 the use of a self-administered questionnaire.
- 27  
28 54 ■ The content validity of the questionnaire was not formally assessed using independent  
29  
30 55 experts.
- 31  
32 56 ■ The study results were not triangulated with findings from qualitative approaches, which  
33  
34 57 could have enhanced our findings.
- 35  
36 58 ■ The research findings may not be generalized beyond the limited study setting.  
37  
38  
39  
40  
41  
42  
43  
44

## 45 60 **INTRODUCTION**

46  
47  
48 61 Hypothermia is a common health problem in patients having surgery that is characterized as a  
49  
50 62 body temperature below 36 °C (96.8°F), and it is usually caused by too much heat loss from cold  
51  
52 63 weather exposure, anesthetic effects, and the administration of cold intravenous or irrigation  
53  
54 64 fluids (1-3). Hypothermia decelerates all physiologic roles, including metabolic rate, mental  
55  
56  
57  
58  
59  
60

65 awareness, nerve conduction, neuromuscular reaction times, and cardiovascular and respiratory  
66 systems, disturbing patients' comfort and leading to longer hospitalizations, higher costs, and  
67 increasing mortality (1, 4).

68 Different studies conducted in different areas revealed that the magnitude of perioperative  
69 hypothermia in Brazil was 56.7%(5), in Australia, 74% (6), and in Turkey, the research hospital  
70 of Ankara and Trakya University Hospital were 78.6% and 63.3% respectively (7, 8). In other  
71 studies conducted in Thailand, the incidence of preoperative, intraoperative, and postoperative  
72 hypothermia was 0.4%, 73.5%, and 11.9% respectively (9). While the study was conducted in  
73 Germany to evaluate the hypothermia rates achieved with pre-warming and without pre-warming  
74 methods, the results revealed patients subjected to pre-warming showed an intraoperative  
75 hypothermia rate of 15.8% and a postoperative hypothermia rate of 5.1%. In comparison,  
76 patients without pre-warming showed an intraoperative hypothermia rate of 30.4% and  
77 a postoperative hypothermia rate of 12.4%. This means a 52% reduction in the intraoperative  
78 hypothermia rate and a 41% reduction in the postoperative hypothermia rate for patients who  
79 received pre-warming (10). Furthermore, in studies conducted in Ethiopia at Tikur Anbessa  
80 Specialized Hospital, the overall magnitude of preoperative, intraoperative, and postoperative  
81 hypothermia was 16.2%, 53.2%, and 31.3%, respectively (11). In contrast, at the University of  
82 Gondar Comprehensive Specialized Referral Hospital (UoGCSRH), preoperative, intraoperative,  
83 and postoperative hypothermia incidence was 23.4%, 49.7%, and 50.6%, respectively (12).  
84 However, available literature shows that nurses' knowledge and practice towards perioperative  
85 hypothermia prevention is low despite the high incidence, serious consequences, and availability  
86 of effective interventions to prevent and treat this frequent surgical complication (2, 13). In  
87 intervention studies conducted on perioperative hypothermia prevention in Brazil and Turkey,

1  
2  
3 88 55.9% and 61.77% of nurses had good knowledge before training (4, 14). Another cross-  
4  
5 89 sectional study was done in Ethiopia regarding perioperative hypothermia prevention in trauma  
6  
7 90 patients; only 52.1% of nurses had good knowledge (15). In studies conducted in South Africa  
8  
9 91 and Gambia, 46% and 19% of nurses had good perioperative hypothermia prevention practices,  
10  
11 92 respectively (13, 16).

12  
13  
14  
15 93 According to the Association of Perioperative Register Nurses (AORN) Guidelines, nurses must  
16  
17 94 have knowledge and skills in preventing hypothermia during the perioperative phase. This  
18  
19 95 includes measuring the patient's body temperature, selecting methods to prevent unintended  
20  
21 96 hypothermia, and implementing the selected insulation and warming interventions (17).  
22  
23 97 Warming intervention measures include warming patients before, during, and after surgery using  
24  
25 98 passive insulation and active warming methods such as warmed cotton blankets, surgical  
26  
27 99 draping, thermal garments, forced-air warming devices, electric warming blankets, and warmed  
28  
29 100 fluids (18, 19).

30  
31  
32  
33  
34 101 Preventing heat loss and maintaining a normal body temperature are essential nursing tasks in the  
35  
36 102 early resuscitation phase, as metabolic changes accompanied by injury cannot be corrected when  
37  
38 103 patients are hypothermic (20). Nurses need to be cognizant of the risks associated with each  
39  
40 104 perioperative phase of the patient in the prevention of hypothermia (21). Preserving a normal  
41  
42 105 body temperature during the surgical experience enhances the patient's chance of preventing  
43  
44 106 postoperative complications (22). Different evidence reported that maintenance of a normal body  
45  
46 107 temperature decreases the length of hospitalization by approximately up to 40%, the risk of  
47  
48 108 surgical site infection by 64%, may prevent the costs of potential stay in the intensive care unit  
49  
50 109 by \$1,000 and a prolonged hospital stay by \$465 per day, and also decreasing mortality rate by  
51  
52 110 fourfold (23-25).

1  
2  
3 111 If nurses do not have adequate knowledge and skill in the prevention of perioperative  
4  
5 112 hypothermia, its occurrence is inevitable. Even if nurses' knowledge and practice are important  
6  
7 113 in preventing perioperative hypothermia and its complications, available literature revealed that  
8  
9 114 nurses had significant knowledge and practice gaps (13, 15). Different sociodemographic and  
10  
11 115 institutional factors affect nurses' knowledge and practice, such as age, marital status,  
12  
13 116 educational level, work experience, guidelines and risk assessment protocols, training, reading  
14  
15 117 updated evidence, and job satisfaction, affect nurses' knowledge and practice (2, 13, 15, 26, 27).  
16  
17  
18  
19

20 118 In Ethiopia, there is limited evidence regarding the knowledge and practice of nurses in  
21  
22 119 perioperative hypothermia prevention. Therefore, this study assessed nurses' knowledge and  
23  
24 120 practices with respect to perioperative hypothermia prevention in Northwest Amhara Regional  
25  
26 121 State Referral Hospitals, Northwest Ethiopia, and investigated the factors associated with good  
27  
28 122 knowledge and practice.  
29  
30  
31

## 32 123 **METHODS**

### 33 34 35 124 **Study design and settings**

36  
37  
38 125 An institutional-based cross-sectional study was conducted in five referral hospitals'  
39  
40 126 perioperative units or wards from March 25 to May 20, 2021.

41  
42 127 The study was conducted in Northwest Amhara Regional State Referral Hospitals, Northwest  
43  
44 128 Ethiopia. Northwest Amhara is found in the northwestern part of Ethiopia. There are five  
45  
46 129 governmental referral hospitals in Northwest Amhara regional state, namely the University of  
47  
48 130 Gondar Comprehensive Specialized Referral Hospital (UoGCSRH), Felege Hiwot Referral  
49  
50 131 Hospital (FHRH), Tibebe Gion Specialized Referral Hospital (TGSRH), Debre Markos Referral  
51  
52  
53  
54  
55  
56  
57  
58  
59  
60

1  
2  
3 132 Hospital (DMRH), and Debre Tabor Comprehensive Referral Hospital (DTCRH). All of these  
4  
5 133 hospitals provide both outpatient and inpatient services.  
6  
7

8 134 The surgical department is one of the actively serving departments that provide emergency and  
9  
10 135 elective surgery among hospital services. All five hospitals have different surgical units in their  
11  
12 136 surgical departments, such as surgical emergency, operation room, recovery ward, surgical ward,  
13  
14 137 orthopedics ward, and surgical intensive care unit (ICU). According to information obtained  
15  
16 138 from the administrative offices of these hospitals, 1682 nurses provide services. Among those,  
17  
18 139 725 nurses (153 in UoGCSRH, 220 in FHRH, 144 in TGSRH, 127 in DMRH, and 81 in  
19  
20 140 DTCRH) working in surgical departments (28-32). Nurses in the perioperative unit provide  
21  
22 141 different hypothermia preventive activities like covering patients with linens and blankets,  
23  
24 142 measuring patients' temperatures, warming intravenous fluids, adjusting room temperature, and  
25  
26 143 so on because preventing perioperative hypothermia is crucial for nurses.  
27  
28  
29  
30  
31

## 32 **Participants**

33  
34 145 All nurses working in the emergency ward, operation room, recovery ward, surgical ward,  
35  
36 146 orthopedics ward, and surgical ICU of Northwest Amhara Regional State Referral Hospitals  
37  
38 147 were the source populations. Whereas nurses who were working in an emergency ward,  
39  
40 148 operation room, recovery ward, surgical ward, orthopedics ward, and surgical ICU of  
41  
42 149 UoGCSRH, DTCRH, DMRH, TGRH, and FHRH during the data collection period were the  
43  
44 150 study population.  
45  
46  
47  
48

49 151 All nurses working in the surgical emergency, operating room, recovery ward, surgical ICU,  
50  
51 152 surgical ward, and orthopedic ward of Northwest Amhara Regional State Referral Hospitals,  
52  
53 153 Northwest Ethiopia, were included in this study. Whereas matron and ward coordinator, nurses  
54  
55  
56  
57  
58  
59  
60

1  
2  
3 154 were excluded because those nurses are primarily responsible for coordinating, monitoring, and  
4  
5 155 evaluating the staff nurses rather than doing routine activities.  
6  
7

## 8 156 **Sample size and sampling procedure**

9  
10  
11 157 The sample size was calculated using the single population proportion formula ( $n = Z\alpha/2^2 * P(1 -$   
12  
13 158  $P) / d^2$ ). A 50% proportion of nurses' knowledge and practice on hypothermia prevention, 95%  
14  
15 159 confidence level, and 5% expected margin of error (d) were used. By considering a 10% non-  
16  
17 160 response rate, the final sample becomes 423.  
18  
19

20 161 The study participants were recruited using a stratified sampling technique. Initially, the study  
21  
22 162 participants are stratified by hospital and working ward or unit, and the required sample for each  
23  
24 163 stratum is allocated proportionally. According to all hospitals' human resources and  
25  
26 164 administration reports, the total number of nurses working in these units or wards was 725. The  
27  
28 165 calculated sample size was then proportionally allocated to each hospital according to the  
29  
30 166 number of nurses working in the respective departments or wards (i.e. from 153, 89 in  
31  
32 167 UoGCSRH, from 144, 84 in TGRH, from 220, 128 in FHRH, from 81, 48 in DTRH, and from  
33  
34 168 127, 74 nurses in DMRH). Finally, study participants were chosen using a simple random  
35  
36 169 sampling technique from each sampling frame (Supplemental Figure).  
37  
38  
39  
40

## 41 170 **Variables and measurements**

42  
43  
44 171 **Knowledge** of nurses on hypothermia prevention was assessed using twenty-seven questions  
45  
46 172 derived from the association of perioperative register nurse guidelines and literature (3, 13, 21).  
47  
48 173 If the study participants answered the knowledge questions above or were equal to the computed  
49  
50 174 median score, they were considered to have good knowledge.  
51  
52  
53  
54  
55  
56  
57  
58  
59  
60

1  
2  
3 175 **Practice** of nurses on hypothermia prevention is activities performed by nurses to prevent  
4  
5 176 hypothermia. It was measured by fourteen items with Likert scale containing three response  
6  
7 177 options with a code of 0 = never, sometimes, = 1, and always = 2 (3, 13, 15). Participants who  
8  
9 178 answered above or equal to the computed median of practice questions were considered to have  
10  
11 179 good practice.

12  
13  
14 180 **Job satisfaction** is the nurses' degree of negative or positive views about their job or job  
15  
16 181 experience. It was measured using twenty-seven items of a five-point Likert scale (1 = strongly  
17  
18 182 disagree to 5 = strongly agree) (33). When the total score for the job satisfaction questionnaire  
19  
20 183 was greater than or equal to the computed median, we said they were satisfied.

## 21 184 **Data collection instruments and procedure**

22  
23  
24 185 A self-administered structured questionnaire was used to collect the data. The questionnaires  
25  
26 186 were developed based on AORN and NICE perioperative hypothermia prevention guidelines and  
27  
28 187 other literature (3, 13, 15, 21, 34, 35). In addition to the outcome variable, the tool contains  
29  
30 188 sociodemographic, institutional, and other factors (13, 15, 26, 27, 33, 36) (Supplemental File).  
31  
32 189 Five BSc nurses working outside the study wards and two MSc holder nurses were recruited for  
33  
34 190 the data collection and supervision, respectively. Overall, the principal investigator coordinated  
35  
36 191 and supervised the data collection process.

## 37 192 **Data quality control**

38  
39 193 To assure the quality of the data, the questionnaire was first prepared in English, then translated  
40  
41 194 to Amharic (local language), and then translated back to English to check its consistency. One-  
42  
43 195 day training on the purpose of the study and the data collection procedure was provided to the  
44  
45 196 data collectors and supervisors. Additionally, the tool was pretested at Woldia Comprehensive  
46  
47 197 Referral Hospital with 5% of the sample size. For the dependent variable and job satisfaction

1  
2  
3 198 questionnaires, internal consistency was checked using Cronbach's alpha test, and its values were  
4  
5 199 in the acceptable range with a minimum value of 0.77. Supervisors and primary investigators  
6  
7  
8 200 conducted routine supervision to verify the consistency and completeness of the questionnaires  
9  
10 201 that were filled out.

## 13 202 **Data processing and analysis**

16 203 After the data was checked for consistency and completeness, data were entered into Epi Info  
17  
18 204 version 7 and exported into SPSS version 25 for analysis. A frequency table described the  
19  
20  
21 205 participant's characteristics, knowledge, and practice scores. Multicollinearity among the  
22  
23 206 dependent variables was assessed using the variance inflation factor, and its values were between  
24  
25  
26 207 1 and 10. Model adequacy was checked using the Hosmer-Lemeshow goodness of fit test, and  
27  
28 208 the model was fitted well, indicating 0.856 and 0.993 for knowledge and practice, respectively.  
29  
30 209 Binary logistic regression was used to determine the significant association between the  
31  
32 210 independent and dependent variables. Those independent variables, less than 0.2 in bivariable  
33  
34  
35 211 analysis, were entered into multivariable logistic regressions. The association between the  
36  
37 212 independent and dependent variables was considered significant if the P-value was less than 0.05  
38  
39 213 from multivariate logistic regression analysis. AOR with 95% CI and a p-value of < 0.05 were  
40  
41  
42 214 used to declare associated factors with the knowledge and practice of nurses on hypothermia  
43  
44 215 prevention.

## 47 216 **Patient and public involvement**

50 217 None.

## 53 218 **RESULTS**



## 219 Sociodemographic characteristics of the respondents

220 In the present study, 413 nurses responded to the self-administered questionnaires with a  
 221 response rate of 97.6%. The study participants' median age (IQR) was 29 (27, 32) years. Above  
 222 average, 213 (51.6%) participants were male, and the majority, 235(56.9%) were married.  
 223 Regarding their educational status, nearly three-fourths of the respondents had a bachelor's  
 224 degree (Table 1).

225 **Table 1.** Sociodemographic characteristics of nurses on perioperative hypothermia prevention in  
 226 Amhara Regional State Referral Hospitals, Northwest Ethiopia, 2021(N=413)

| Variable                  | Response   | Frequency (N=413) | Percentage (%) |
|---------------------------|------------|-------------------|----------------|
| <b>Sex</b>                | Male       | 213               | 51.6           |
|                           | Female     | 200               | 48.4           |
| <b>Age</b>                | ≤ 25 years | 53                | 12.8           |
|                           | 26-30      | 224               | 54.2           |
|                           | 31-35      | 86                | 20.8           |
|                           | ≥ 35       | 50                | 12.1           |
| <b>Marital status</b>     | Single     | 163               | 39.5           |
|                           | Married    | 235               | 56.9           |
|                           | Divorced   | 12                | 2.9            |
|                           | Widowed    | 3                 | .7             |
| <b>Educational status</b> | Diploma    | 59                | 14.3           |
|                           | Degree     | 311               | 75.3           |
|                           | Master     | 43                | 10.4           |
| <b>Work experience</b>    | ≤ 5 years  | 157               | 38             |

|                            |           |     |      |
|----------------------------|-----------|-----|------|
|                            | 6-10      | 181 | 43.8 |
|                            | 11-15     | 57  | 13.8 |
|                            | ≥ 16      | 18  | 4.4  |
| <b>Monthly salary(ETB)</b> | ≤ 5000    | 42  | 10.2 |
|                            | 5001-7000 | 158 | 38.3 |
|                            | 7001-9000 | 172 | 41.6 |
|                            | ≥ 9001    | 41  | 9.9  |

227 ETB= Ethiopian Birr.

## 228 **Institutional and job-related factors**

229 From 413, 268(64.9%) of nurses did not receive training on perioperative hypothermia  
 230 prevention. Half of the respondents reported reading or reviewing updated evidence, and only  
 231 121(29.3%) participants were notified of guidelines or protocols in their working area. Majority  
 232 of study participants, 268 (64.9%) and 342 (82.8%) had a thermometers and warming materials  
 233 shortage, respectively. Nearly half, 217 (52.5%) of the participants were satisfied with their jobs  
 234 (Supplemental Table).

## 235 **Knowledge of nurses on hypothermia prevention**

236 The overall knowledge of nurses on perioperative hypothermia prevention was 59.1% (95% CI:  
 237 54.7-63.7), the median knowledge score was 18 (IQR: 16, 21). Among a total of knowledge  
 238 assessment questions, 359(86.9%) participants correctly answered the statement about  
 239 thermoregulation, while 250(60.5) answered the complications of hypothermia in surgical  
 240 patients. Only 83(20.1%) of the participants correctly responded in the theatre room; the patient's  
 241 temperature should be measured every 30 minutes, while in the recovery room, every 15 minutes  
 242 (Table 2).

243 **Table 2.** Nurse's responses on knowledge of perioperative hypothermia prevention (N=413)

| Statements about perioperative hypothermia prevention                                                                                                                                      | True / False | Correct answer |      | Wrong answer/I don't know |      |
|--------------------------------------------------------------------------------------------------------------------------------------------------------------------------------------------|--------------|----------------|------|---------------------------|------|
|                                                                                                                                                                                            |              | N              | %    | N                         | %    |
| The internal environment of humans can be maintained by thermoregulation.                                                                                                                  | T*           | 359            | 86.9 | 54                        | 13.1 |
| PH during the perioperative cycle is characterized as a core body temperature < 36 ° C.                                                                                                    | T*           | 288            | 69.7 | 125                       | 30.3 |
| Anesthetic drugs decrease heat loss in surgical patients.                                                                                                                                  | F**          | 311            | 75.3 | 102                       | 24.7 |
| Cold IV fluids and blood products increase heat loss.                                                                                                                                      | T*           | 288            | 69.5 | 126                       | 30.5 |
| PH is not associated with complications such as changes in drug metabolism, healing complications, shivering, clotting defects, cardiac morbidity, and prolonged post-anesthetic recovery. | F**          | 250            | 60.5 | 163                       | 39.5 |
| To minimize postoperative complications, nurses should advise patients to bring along additional clothing to help them stay warm before surgery                                            | T*           | 339            | 82.1 | 74                        | 17.9 |
| The pulmonary artery catheter, distal esophagus, urinary bladder, rectum, and zero heat-flux are some of the sites for temperature measurements.                                           | T*           | 174            | 42.1 | 239                       | 57.9 |
| Nurses should be well-trained and knowledgeable about the use of both temperature recording and warming devices                                                                            | T*           | 346            | 83.8 | 67                        | 16.2 |
| Forced-air warming devices, warm water circulating and conductive devices are not some of the devices for warming surgical patients                                                        | F**          | 241            | 58.4 | 172                       | 41.6 |
| The method for temperature monitoring should not be chosen based on the criteria for a procedure                                                                                           | F**          | 281            | 68   | 132                       | 32   |
| To ensure accurate information, the team takes the patient's temperature at 15-minute intervals using different measuring devices at different sites.                                      | F**          | 138            | 33.4 | 275                       | 66.6 |
| Patients with a temperature < 36.0°C undergoing anesthesia & and those having a high risk of cardiovascular complications are at higher risk for IPH                                       | T*           | 293            | 70.9 | 120                       | 29.1 |
| Measuring patients' temperature an hour before departing the ward is unnecessary since it will be measured at the theatre.                                                                 | F**          | 279            | 67.6 | 134                       | 32.4 |
| Except in urgent circumstances, preoperative patients with temperatures of < 36.0°C should be warmed for 30' by using the active warming method                                            | T*           | 284            | 68.8 | 129                       | 31.2 |
| Special attention should be given to the comfort of surgical patients having difficulties expressing themselves                                                                            | T*           | 335            | 81.1 | 78                        | 18.9 |
| The method for warming patients should be chosen based on the planned procedure, patient position, IV access site, and warming equipment constraints.                                      | T*           | 333            | 80.6 | 80                        | 19.4 |

|                                                                                                                                               |     |     |      |     |      |
|-----------------------------------------------------------------------------------------------------------------------------------------------|-----|-----|------|-----|------|
| Critical incidence reporting is unnecessary for patients entering into the theatre with a temperature of less than 36.0°C.                    | F** | 259 | 62.7 | 154 | 37.3 |
| Induction of anesthesia should not begin unless the patient's temperature is 36.0°C or above.                                                 | T*  | 203 | 49.2 | 210 | 50.8 |
| The theatre's room temperature should be at least 21°C which can be adjusted to allow better working once active warming is initiated.        | T*  | 273 | 66.1 | 140 | 33.9 |
| All intraoperative irrigation fluids should be warmed in a thermostatically controlled cabinet to 38- 40°C.                                   | T*  | 214 | 51.8 | 199 | 48.2 |
| Fluid warming devices should be used to warm IV fluids (500 mls or more) & and blood products to 37°C                                         | T*  | 260 | 63   | 153 | 37   |
| Regardless of patients' temperatures before leaving the ward, they should be warmed using active warming method once in the theatre           | T*  | 256 | 62   | 157 | 38   |
| The surgical patient should be well covered throughout surgery to conserve heat and only be exposed during surgical preparation.              | T*  | 310 | 75.1 | 103 | 24.9 |
| During the postoperative period, hypothermic patients should be warmed using AWM until they become warm before being transferred to the ward. | T*  | 348 | 84.3 | 65  | 15.7 |
| Patients should be provided with at least one cotton sheet, two blankets, or a duvet during the postoperative phase                           | T*  | 319 | 77.2 | 94  | 22.8 |
| While in the OR, the patient's temperature should be measured every 15 minutes and every 30 minutes while in the RR.                          | F** | 83  | 20.1 | 330 | 79.9 |
| The temperature of postoperative patients should be recorded on arrival in the ward and documented as part of a routine 4-hour observation.   | T*  | 337 | 81.6 | 76  | 18.4 |

244 T\*-True statement, F\*\*-False statement, N- Number of participants.

## 245 Practice of nurses on hypothermia prevention

246 The overall median practice score of nurses on perioperative hypothermia prevention was 18  
 247 (IQR: 14, 21), and their overall practice in hypothermia prevention was 50.4% (95% CI: 45.5 -  
 248 55.0). Among practice assessment questions, 258(62.5%) of the respondents measured  
 249 temperature as soon as the patient arrived, and 224(54.2%) always assessed hypothermia's signs  
 250 and symptoms. Nearly half of the respondents, 213(51.6%) sometimes applied warm  
 251 intravenous, blood products, and irrigation fluids. About 185(44.8%) respondents reported never

252 using forced-air warming devices, warm water circulating devices, and conductive devices for  
 253 warming surgical patients (Table 3).

254 **Table 3.** Nurse's responses on the practice of perioperative hypothermia prevention (N=413)

| Hypothermia prevention practices                                                                                                | Never |      | Some times |      | Always |      |
|---------------------------------------------------------------------------------------------------------------------------------|-------|------|------------|------|--------|------|
|                                                                                                                                 | N     | %    | N          | %    | N      | %    |
| Do you measure temperature as soon as the patient arrives?                                                                      | 21    | 5.1  | 134        | 32.4 | 258    | 62.5 |
| Do you measure temperature regularly according to guidelines?                                                                   | 50    | 12.1 | 202        | 48.9 | 161    | 39   |
| Do you warm intravenous, blood products, and irrigation fluids using warming devices before administering them to patients?     | 112   | 27.1 | 213        | 51.6 | 88     | 21.3 |
| Do you cover the mattress plastic sheet with dry linen before patient admission?                                                | 59    | 14.3 | 200        | 48.4 | 154    | 37.3 |
| Do you use forced-air warming, warm water circulating devices, and conductive devices for warming patients?                     | 185   | 44.8 | 170        | 41.2 | 58     | 14   |
| Do you communicate your assessment findings on factors that could lead to hypothermia to all members of the perioperative team? | 57    | 13.8 | 160        | 38.7 | 196    | 47.5 |
| Do you advise patients to inform you when they feel cold during their hospitalization?                                          | 53    | 12.8 | 195        | 47.2 | 165    | 40   |
| Do you develop and implement care plans for perioperative hypothermia prevention?                                               | 73    | 17.7 | 217        | 52.5 | 123    | 29.8 |
| Do you document the site for temperature measurement in the patient's file?                                                     | 63    | 15.3 | 156        | 37.8 | 194    | 47   |
| Do you maintain ambient room temperature according to the guidelines?                                                           | 110   | 26.6 | 214        | 51.8 | 89     | 21.5 |
| Do you assess patients for their risk for perioperative hypothermia?                                                            | 41    | 9.9  | 202        | 48.9 | 170    | 41.2 |
| Do you assess for signs and symptoms of hypothermia?                                                                            | 30    | 7.3  | 159        | 38.5 | 224    | 54.2 |
| Do you advise patients to stay warm before surgery?                                                                             | 48    | 11.6 | 185        | 44.8 | 180    | 43.6 |
| Do you include thermoregulation interventions and patient-related care to thermoregulation in your hand-over report             | 41    | 9.9  | 194        | 47   | 178    | 43.1 |

### 255 **Factors associated with the level of knowledge on hypothermia prevention**

256 In the binary logistic regression, ten of fifteen variables had a p-value of < 0.2 and were  
 257 candidates for multiple logistic regression. In multiple logistic regression, only three variables  
 258 were significantly associated with knowledge of perioperative hypothermia

259 prevention. Accordingly, being male [AOR = 1.61, 95% CI (1.02-2.53)], an educational level of  
 260 degree and master [AOR = 2.50; 95% CI (1.25-5.00), 4.39; (1.45-13.20)] respectively, and taking  
 261 training on perioperative hypothermia prevention [AOR = 3.68; 95% CI (2.14-6.33)] were  
 262 significantly associated with their knowledge (Table 4).

263 **Table 4.** Bi-variable and multivariable analysis of factors associated with nurses' knowledge in  
 264 perioperative hypothermia prevention in Amhara Region Referral Hospitals, Northwest Ethiopia

| Variable           | Knowledge of nurses |      | COR (95%CI)     | P-value | AOR (95% CI)    | P-value |
|--------------------|---------------------|------|-----------------|---------|-----------------|---------|
|                    | Good                | Poor |                 |         |                 |         |
| Sex                |                     |      |                 |         |                 |         |
| Female             | 105                 | 95   | 1               |         | 1               |         |
| Male               | 139                 | 74   | 1.69(1.14-2.52) | .009    | 1.61(1.02-2.53) | .038**  |
| Educational status |                     |      |                 |         |                 |         |
| Diploma            | 19                  | 40   | 1               |         | 1               |         |
| Degree             | 191                 | 120  | 3.35(1.85-6.05) | .000    | 2.50(1.25-5.00) | .010**  |
| Master             | 34                  | 9    | 7.95(3.18-19.8) | .000    | 4.39(1.45-13.2) | .008**  |
| Hospital           |                     |      |                 |         |                 |         |
| FHRH               | 67                  | 59   | 1               |         | 1               |         |
| UoGCSRH            | 48                  | 35   | 1.20(.69-2.11)  | .314    | 1.18(.631-2.21) | .601    |
| DMCRH              | 51                  | 22   | 2.04(1.11-3.76) | .056    | 1.74(.863-3.49) | .118    |
| DTCRH              | 33                  | 14   | 2.08(1.01-4.25) | .046    | 2.16(.933-4.94) | .068    |
| TGSRH              | 45                  | 39   | 1.01(.58-1.77)  | .955    | 1.20(.627-2.29) | .581    |
| Ward               |                     |      |                 |         |                 |         |
| Emergency          | 52                  | 51   | 1               |         | 1               |         |

|                          |     |     |                 |      |                  |        |
|--------------------------|-----|-----|-----------------|------|------------------|--------|
| Recovery                 | 31  | 8   | 3.8(1.59-9.05)  | .003 | 2.24(.862-5.84)  | .098   |
| ICU                      | 34  | 19  | 1.75(.88-3.46)  | .106 | 1.48(.696-3.16)  | .307   |
| OR                       | 67  | 35  | 1.87(1.07-3.29) | .028 | 1.51(.799-2.86)  | .203   |
| Orthopedics              | 26  | 20  | 1.27(.63-2.56)  | .496 | 1.35(.641-3.02)  | .402   |
| Surgical                 | 34  | 36  | .92(.50-1.70)   | .805 | .850(.431-1.67)  | .640   |
| Monthly salary(ETB)      |     |     |                 |      |                  |        |
| ≤ 5000                   | 18  | 21  | 1               |      | 1                |        |
| 5001-7000                | 90  | 74  | 1.41(.7-2.85)   | .477 | 1.10 (.478-2.35) | .885   |
| 7001-9000                | 107 | 64  | 1.95(.96-3.93)  | .075 | .848(.492-2.49)  | .802   |
| ≥ 9001                   | 29  | 10  | 3.38(1.3-8.79)  | .010 | 1.53(.507-4.67)  | .447   |
| Having guideline         |     |     |                 |      |                  |        |
| No                       | 124 | 168 | 1               |      | 1                |        |
| Yes                      | 75  | 46  | 1.37(.88-2.1)   | .153 | .848(.490-1.46)  | .555   |
| Took Training            |     |     |                 |      |                  |        |
| No                       | 128 | 140 | 1               |      | 1                |        |
| Yes                      | 116 | 29  | 4.37(2.72-7.01) | .000 | 3.68(2.14-6.33)  | .000** |
| Reading updated evidence |     |     |                 |      |                  |        |
| No                       | 106 | 100 | 1               |      | 1                |        |
| Yes                      | 138 | 69  | 1.88(1.26-2.80) | .002 | 1.32(.834-2.10)  | .234   |
| Shortage of thermometer  |     |     |                 |      |                  |        |
| Yes                      | 148 | 120 | 1               |      | 1                |        |
| No                       | 96  | 49  | 1.58(1.04-2.41) | .031 | 1.27(.776-2.08)  | .325   |
| Job satisfaction         |     |     |                 |      |                  |        |
| Unsatisfied              | 100 | 95  | 1               |      | 1                |        |
| Satisfied                | 144 | 74  | 1.84(1.24-2.74) | .002 | 1.38(.873-2.20)  | .166   |

265 \*\*Statistically significant at p-value <0.05.

266

## 267 **Factors associated with the level of practice on hypothermia prevention**

268 In bivariate logistic regression analysis, eleven of sixteen variables were found to have  
 269 significant predictors at a p-value < 0.2 and were candidates for multiple logistic regression. In  
 270 multiple logistic regression, only four variables were significantly associated with the practice of  
 271 nurses on hypothermia prevention at (P<0.05).

272 Nurses who were working in recovery and intensive care units [AOR = 2.87; 95% CI (1.08-7.58),  
 273 and 2.39; 95% CI (1.09-5.22)] respectively, having training related to hypothermia prevention  
 274 [AOR = 2.64; 95% CI (1.53-4.57)], satisfied with their job [AOR 2.15; 95% CI (1.34-3.43)], and  
 275 good knowledge on hypothermia [AOR 2.64; 95% CI (1.63-4.27)] were significantly associated  
 276 with their practice (Table 5).

277 **Table 5.** Bi-variable and multivariable analysis of factors associated with the practice of nurses  
 278 on perioperative hypothermia prevention in Amhara Region Referral Hospitals, Northwest  
 279 Ethiopia

| Variable           | Practice of nurses |      | COR (95%CI)     | P-value | AOR (95% CI)    | P-value |
|--------------------|--------------------|------|-----------------|---------|-----------------|---------|
|                    | Good               | Poor |                 |         |                 |         |
| Educational status |                    |      |                 |         |                 |         |
| Diploma            | 16                 | 43   | 1               |         | 1               |         |
| Degree             | 159                | 152  | 2.81(1.51-5.20) | .000    | 1.94(.902-4.20) | .089    |
| Master             | 24                 | 19   | 3.39(1.47-7.79) | .002    | 1.28(.411-4.00) | .669    |
| Working ward       |                    |      |                 |         |                 |         |



|                              |     |     |                 |      |                 |        |
|------------------------------|-----|-----|-----------------|------|-----------------|--------|
| Emergency                    | 41  | 62  | 1               |      | 1               |        |
| Recovery                     | 30  | 9   | 5.04(2.1-11.71) | .000 | 2.87(1.08-7.58) | .033** |
| ICU                          | 34  | 19  | 2.70(1.36-5.37) | .004 | 2.39(1.09-5.22) | .029** |
| OR                           | 59  | 43  | 2.07(1.18-3.62) | .010 | 1.63(.856-3.12) | .136   |
| Orthopedics                  | 20  | 26  | 1.16(.575-2.35) | .674 | 1.17(.527-2.62) | .693   |
| Surgical                     | 24  | 46  | .78(.419-1.48)  | .467 | .657(.321-1.34) | .250   |
| Work experience              |     |     |                 |      |                 |        |
| ≤ 5 years                    | 69  | 88  | 1               |      | 1               |        |
| 6-10                         | 95  | 86  | 1.4(.917-2.16)  | .118 | 1.26(.713-2.23) | .424   |
| 11-15                        | 32  | 25  | 1.63(.886-3.00) | .116 | 1.68(.735-3.86) | .217   |
| ≥ 16                         | 12  | 6   | 2.55(.911-7.14) | .075 | 3.26(.85-12.44) | .083   |
| Monthly salary(ETB)          |     |     |                 |      |                 |        |
| ≤ 5000                       | 17  | 25  | 1               |      | 1               |        |
| 5001-7000                    | 67  | 91  | 1.08(.542-2.16) | .822 | 1.01(.436-2.35) | .976   |
| 7001-9000                    | 98  | 74  | 1.94(.987-3.86) | .057 | 1.26(.517-3.10) | .604   |
| ≥ 9001                       | 26  | 15  | 2.54(1.05-6.17) | .038 | 1.05(.310-3.58) | .933   |
| Having guidelines/ protocol  |     |     |                 |      |                 |        |
| No                           | 131 | 161 | 1               |      | 1               |        |
| Yes                          | 77  | 44  | 2.15(1.39-3.32) | .001 | 1.42(.824-2.47) | .205   |
| Took training                |     |     |                 |      |                 |        |
| No                           | 104 | 164 | 1               |      | 1               |        |
| Yes                          | 104 | 41  | 4.00(2.58-6.19) | .000 | 2.64(1.53-4.57) | .001** |
| Reading updated evidence     |     |     |                 |      |                 |        |
| No                           | 84  | 122 | 1               |      | 1               |        |
| Yes                          | 124 | 83  | 2.17(1.46-3.21) | .000 | 1.37(.853-2.21) | .192   |
| Constraint of thermometer    |     |     |                 |      |                 |        |
| Yes                          | 123 | 145 | 1.67(1.11-2.51) | .014 | 1.10(.661-1.83) | .711   |
| No                           | 85  | 60  | 1               |      | 1               |        |
| Shortage of warming material |     |     |                 |      |                 |        |

|                  |     |     |                 |      |                 |        |
|------------------|-----|-----|-----------------|------|-----------------|--------|
| Yes              | 166 | 176 | 1.53(.914-2.57) | .105 | 1.77(.923-3.39) | .086   |
| No               | 42  | 29  | 1               |      | 1               |        |
| Job satisfaction |     |     |                 |      |                 |        |
| Unsatisfied      | 71  | 124 | 1               |      | 1               |        |
| Satisfied        | 137 | 81  | 2.95(1.97-4.41) | .000 | 2.15(1.34-3.43) | .001** |
| Knowledge        |     |     |                 |      |                 |        |
| Good             | 157 | 87  | 4.17(2.74-6.35) | .000 | 2.64(1.63-4.27) | .000** |
| Poor             | 51  | 118 | 1               |      | 1               |        |

280 \*\*Statistically significant at p-value <0.05.

## 281 DISCUSSION

282 This study showed that the overall knowledge of nurses on perioperative hypothermia prevention  
 283 was 59.1%. This finding is higher than the result of a study done in Ethiopia (52.1%) (15). The  
 284 possible reason might be due to sociodemographic differences. In the previous study, most  
 285 participants had a degree and diploma level of educational status, and the study area was a single  
 286 trauma center setting. In contrast, in the current study, more than 10% of the participants had  
 287 masters, and the study setting was multicenter. The other reason might be the difference in the  
 288 time of the study because of the advancement of technology, including updated evidence;  
 289 educational programs were increased when the time was more recent. So, the participant might  
 290 have to get more information regarding the topics.

291 However, this finding is much lower than those of studies conducted in Gambia (82%) (13),  
 292 Turkey (77.5%) (4), Brazil (81.5%) (14), the University of Iowa Hospitals and Clinics, America  
 293 (71%) (37), Maryland, America (100%) (38), Ireland (39). Besides, our study finding is lower  
 294 than the NICE, AORN, and ASPAN guidelines for perioperative hypothermia prevention (3, 17,  
 295 21). The possible justification for this difference might be due to the level of staff training,

1  
2  
3 296 adopted recommended guidelines, socioeconomic status, and sample size. According to training  
4  
5 297 on hypothermia prevention in this study, only a few nurses (35.1%) have been trained, while in  
6  
7 298 the comparison group, except in Gambia, almost all participants were received training on  
8  
9 299 perioperative hypothermia prevention. In terms of using guidelines or protocols, in the studies  
10  
11 300 conducted in America, participants always used recommended guidelines and protocols, while in  
12  
13 301 this study only 29.3% of nurses were reported as having guidelines or protocols. Regarding the  
14  
15 302 difference in socioeconomic status of the participants and the study setting, we Ethiopians are in  
16  
17 303 a low-income country compared to America, Brazil, and Ireland. This indirectly affects the  
18  
19 304 quality of healthcare education and the healthcare setting. In terms of sample size, the present  
20  
21 305 study has a larger sample size (n = 413) compared to all the aforementioned studies (in Gambia  
22  
23 306 (n = 53), Turkey (n = 200), Brazil (n = 21), the University of Iowa Hospitals and Clinics,  
24  
25 307 America (n = 30), Maryland (n = 19), and Ireland (n = 198).

26  
27 308 In this study, the overall practice of nurses on perioperative hypothermia prevention was 50.4%.  
28  
29 309 This finding is consistent with the result of studies conducted in Addis Ababa, Ethiopia (52.5%)  
30  
31 310 and Durban, South Africa (46%) (15, 16). However, this result is higher than that of a study done  
32  
33 311 in Gambia (19%) (13). The possible reason might be the difference in sociodemographic  
34  
35 312 characteristics, in which most participants in the Gambia study had less than five years of  
36  
37 313 experience and hadn't had a master's education level. On the other hand, the result of this study is  
38  
39 314 much lower than that of NICE, AORN, and ASPAN recommendation guidelines (3, 17, 21). This  
40  
41 315 discrepancy might be attributed to insufficient warming material, measurement material,  
42  
43 316 guidelines or protocol, and nurse training opportunities.

44  
45 317 Regarding nurses' knowledge of hypothermia prevention, this study identified that male nurses  
46  
47 318 had more knowledge than females. This might be explained by the fact that females have

1  
2  
3 319 additional responsibilities at home, such as taking care of children, cooking, cleaning, and so on  
4  
5 320 (40). As a result, they might not have the time to read books or guidelines that broaden their  
6  
7  
8 321 knowledge in the field.

9  
10 322 This study also dictates that nurses who had BSC and master's degrees were more likely to have  
11  
12 323 good knowledge of hypothermia prevention compared to those who had a diploma. This finding  
13  
14 324 is supported by studies conducted in Iran (26) and Brazil (14). This implies that educational  
15  
16  
17 325 interventions are fundamental for nurses to improve their scientific knowledge which in turn  
18  
19 326 increase the quality of patient care (14). Furthermore, this can be explained by the possibility that  
20  
21 327 nurses with higher educational status may be exposed to different courses related to preventing  
22  
23  
24 328 hypothermia.

25  
26  
27 329 Nurses' Knowledge and practice were higher among nurses who received training related to  
28  
29 330 hypothermia prevention compared to those who didn't. This finding is supported by other studies  
30  
31 331 in America (38), Brazil (41), Iran (26), and Turkey (4). This can be explained by the fact that  
32  
33 332 training plays an important role in improving the quality of patient care. This implies the need to  
34  
35 333 promote on-site and off-site training for nurses, which is an invaluable criterion, as training is  
36  
37  
38 334 necessary to update theoretical and practical knowledge in every aspect of nursing education  
39  
40 335 (40).

41  
42  
43 336 This study also showed that nurses working in recovery and intensive care units were more likely  
44  
45 337 to have good practice than those working in the emergency ward. This finding is inconsistent  
46  
47  
48 338 with the study conducted in Turkey; ICU nurses had more knowledge than nurses working in  
49  
50 339 other wards, but their practice was not changing (4). The possible reason recovery and ICU  
51  
52 340 nurses had better practice might be that patients admitted to recovery and ICU wards need close  
53  
54  
55 341 follow-up because of their physiological change or disturbance due to surgery or anesthesia. So,

1  
2  
3 342 working in two wards, the nurses perform more activities, which maintain thermoregulation.  
4

5 343 Another reason might be that the nurse-to-patient ratio is better than in other wards; the standard  
6

7  
8 344 is in recovery one to two, ICU one to one, emergency one to three, and for surgical and  
9

10 345 orthopedic wards, it is one to six in Ethiopia. The other reason might be the better availability of  
11

12 346 resources like a thermometer and warming materials. Also, most nurses in those two wards  
13

14  
15 347 received more training than others.  
16

17 348 In this study, nurses who were satisfied with their jobs were 2.2 times more likely to have a good  
18

19 349 level of practice than those who were not satisfied. Job satisfaction among nurses is highly  
20

21 350 important in building employee interest and efficiency, as higher job satisfaction determines  
22

23 351 better employee performance (42). Therefore, hospital administrators need to improve working  
24

25 352 environments so that nurses feel comfortable, which will result in a positive attitude toward their  
26

27 353 jobs.  
28  
29  
30

31 354 The other significant variable is that nurses who know about hypothermia prevention were 2.6  
32

33 355 times more likely to have good practices than those who do not. This study has supported by  
34

35 356 studies conducted in Nigeria (43) and the Textbook of Brunner & Suddarth (44). AORN  
36

37 357 guideline also supports, surgical team awareness, education, and understanding of hypothermia  
38

39 358 are necessary to change how clinicians provide quality and effective patient care (35).  
40  
41  
42  
43

## 44 359 **Limitations of the study**

45  
46  
47 360 The study findings might be prone to social desirability bias, although this was minimized  
48

49 361 through the use of self-administered questionnaires. In addition, the content validity of the  
50

51 362 questionnaires was not formally assessed by independent experts. □ The study results  
52

53 363 were not triangulated with findings from qualitative approaches, which could have enhanced our  
54  
55  
56  
57  
58  
59  
60

1  
2  
3 364 findings. Finally, despite being a multicentre study covering a large area, the research findings  
4  
5 365 may not be generalized beyond the study setting.  
6  
7

## 8 366 **CONCLUSION**

10  
11  
12 367 This study revealed that the knowledge and practice of nurses on the prevention of perioperative  
13  
14 368 hypothermia in the study area was inadequate compared to the recommended guidelines. Higher  
15  
16 369 educational status, being male, and attending training were significantly associated with good  
17  
18 370 knowledge of nurses on perioperative hypothermia prevention. Concurrently, nurse's working  
19  
20 371 wards, training opportunities, job satisfaction, and nurses' knowledge were the factors contributing  
21  
22 372 to good practice of nurses in preventing perioperative hypothermia.  
23  
24  
25

26  
27 373 Therefore, hospital and healthcare managers need to design in-service training and long term  
28  
29 374 educational opportunities to improve nurses' knowledge and practice in the area. In addition,  
30  
31 375 hospitals need to fulfill the resources such as warming materials, thermometers, and updated  
32  
33 376 guidelines or protocols, and improve working environments so that nurses become safe and  
34  
35 377 comfortable resulting in a positive feeling towards their job. Furthermore, we recommended that  
36  
37 378 future researchers conduct a mixed methods study to provide sufficient evidence for  
38  
39 379 policymakers.  
40  
41  
42

## 43 380 **List of abbreviation**

44  
45  
46  
47 381 AOR: Adjusted Odd Ratio; AORN: Association of perioperative Register Nurses; ASPAN:  
48  
49 382 American Society of PeriAnesthesia Nurses; CI: Confidence Interval; DMRH: Debre Markos  
50  
51 383 Referral Hospital; DTCRH: Debre Tabor Comprehensive Referral Hospital; EMS:Emergency  
52  
53 384 Medical Service; EPI INFO: Statistical Package for Epidemiological Information Analysis;  
54  
55  
56

1  
2  
3 385 FHRH: Felege Hiwot Referral Hospital; ICU: Intensive Care Unit; IPH: Inadvertent  
4  
5 386 Perioperative Hypothermia; OR: Odds Ratio; OR: Operation Room; HP: Perioperative  
6  
7 387 Hypothermia; PI: Principal Investigator; RR: Recovery Room; SPSS: Statistical Package of  
8  
9 388 Social Science; T° c: Temperature In Degree Centigrade; TGSRH: Tibebe Gion Specialized  
10  
11 389 Referral Hospital; UK: United Kingdom; UoGCSRH: University of Gondar Comprehensive  
12  
13 390 Specialized Referral Hospital; USA: United States of America.  
14  
15  
16  
17

## 18 391 **Declarations**

### 21 392 **Ethical approval and consent to participate**

23 393 Ethical clearance was obtained from the University of Gondar Institutional Review Board (IRB)  
24  
25 394 with this Ref. No. S/R/164/2/2021. After explaining the purpose and possible benefits of the  
26  
27 395 study, a permission letter was obtained from each respective hospitals. Written informed consent  
28  
29 396 was obtained from each study participant before data collection. It was explained to the  
30  
31 397 respondents who participated in the study that voluntary and private information would be  
32  
33 398 protected. The process did not identify respondents by their names and respondent privacy was  
34  
35 399 maintained.  
36  
37  
38

### 40 400 **Consent for publication**

42 401 Not applicable.  
43

### 44 402 **Data availability statement**

47 403 No additional data available.  
48

### 49 404 **Competing interests**

52 405 The authors declare that they have no competing interests.  
53

### 54 406 **Funding**

1  
2  
3 407 None.  
4  
5

6 408 **Contributors**  
7  
8

9 409 AWW carried out the study, starting with designing the study, analyzing and interpreting the  
10  
11 410 data, and reviewing the manuscript. BYM, NT, and ED participated in developing the  
12  
13 411 measurement tool or questionnaire, proposal writing, data analysis, interpretation, and  
14  
15 412 commenting on drafts of the paper and manuscript. All authors involved in drafting, reviewing,  
16  
17 413 and editing of the manuscript. All authors read and approved the final manuscript before  
18  
19 414 submitting it to the journal for publication.  
20  
21

22  
23 415 **Acknowledgements**  
24

25  
26 416 The authors would like to thank the University of Gondar, College of Medicine and Health  
27  
28 417 Sciences, School of Nursing. We are also grateful to the five hospital administrators for their  
29  
30 418 cooperation. Finally, we thank the study participants, data collectors and supervisors for their  
31  
32 419 contribution for the study.  
33  
34  
35

36 420 **References**  
37

- 38 421 1. Osilla EV, Marsidi JL, Sharma S. Physiology, Temperature Regulation: StatPearls  
39 422 Publishing, Treasure Island (FL); 2020 2020.  
40  
41 423 2. Giuliano KK, Hendricks J. Inadvertent perioperative hypothermia: current nursing  
42 424 knowledge. AORN journal. 2017;105(5):453-63.  
43  
44 425 3. NICE Clinical Guidelines. Hypothermia prevention and management in adults having  
45 426 surgery. London: National Institute for Health and Care Excellence (NICE ). Available  
46 427 from: . 2016 Dec.:No. 65.<https://www.ncbi.nlm.nih.gov/books/NBK554181/>  
47  
48 428 4. Senol T, Yildiz T. Effects of a training programme on the awareness of inadvertent  
49 429 perioperative hypothermia among surgical nurses. Current Health Studies. 2019:27.  
50  
51  
52  
53  
54  
55  
56  
57  
58  
59  
60



- 1  
2  
3 430 5. Mendonça FT, Ferreira JdS, Guilardi VHF, Guimarães GMN. Prevalence of inadvertent  
4 431 perioperative hypothermia and associated factors: a cross-sectional study. *Therapeutic*  
5 432 *Hypothermia and Temperature Management*. 2021;11(4):208-15.
- 6  
7 433 6. Mehta OH, Barclay KL. Perioperative hypothermia in patients undergoing major colorectal  
8 434 surgery. *ANZ journal of surgery*. 2014;84(7-8):550-5.
- 9  
10 435 7. Sari S, Aksoy SM, But A. The incidence of inadvertent perioperative hypothermia in  
11 436 patients undergoing general anesthesia and an examination of risk factors. *International*  
12 437 *journal of clinical practice*. 2021;75(6):e14103.
- 13  
14 438 8. Sagiroglu G, Ozturk GA, Baysal A, Turan FN. Inadvertent perioperative hypothermia and  
15 439 important risk factors during major abdominal surgeries. *J Coll Physicians Surg Pak*.  
16 440 2020;30(2):123-8.
- 17  
18 441 9. Wongyingsinn M, Pookprayoon V. Incidence and associated factors of perioperative  
19 442 hypothermia in adult patients at a university-based, tertiary care hospital in Thailand. *BMC*  
20 443 *anesthesiology*. 2023;23(1):1-10.
- 21  
22 444 10. Grote R, Wetz A, Bräuer A, Menzel M. Prewarming according to the AWMF S3 guidelines  
23 445 on preventing inadvertant perioperative hypothermia 2014: Retrospective analysis of 7786  
24 446 patients. *Der Anaesthetist*. 2018;67:27-33.
- 25  
26 447 11. Fekede MS, Sahile WA. Research Article Magnitude and associated factors of Perioperative  
27 448 hypothermia in patients who underwent Elective surgery at Tikur Anbessa Specialized  
28 449 Hospital, Addis Ababa, Ethiopia. 2019.
- 29  
30 450 12. Denu ZA, Semple P, Tawuye HY, Kassa AA. Perioperative Hypothermia and Predictors of  
31 451 Intra-Operative Hypothermia among Patients Operated at Gondar university Hospital from  
32 452 March to April 2015. 2015.
- 33  
34 453 13. Jallow O, Bayraktar N. Nurses' Awareness and Practices of Unintentional Perioperative  
35 454 Hypothermia Prevention: A Cross-Sectional Study. *Therapeutic Hypothermia and*  
36 455 *Temperature Management*. 2022.
- 37  
38 456 14. de Souza A PS, Montezello D, . Knowledge of surgical center nursing professionals on  
39 457 hypothermia in surgical oncology patients. *Rev Sobecc*. 2017;22(4):188-92.
- 40  
41 458 15. Geremew T. Assessment of knowledge, practice and associated factors on hypothermia  
42 459 prevention of Nurses among Trauma Patients, 2019.  
43 460 <http://etd.aau.edu.et/handle/123456789/21258> .

- 1  
2  
3 461 16. Nel MJ, Hardcastle TC. Preventative measures taken against hypothermia in selected  
4 462 Durban hospitals' emergency centres and operating theatres. *African journal of emergency*  
5 463 *medicine : Revue africaine de la medecine d'urgence*. 2017;7(4):172-6.
- 6  
7  
8 464 17. Bashaw MA. Guideline Implementation: Preventing Hypothermia. *AORN Journal*.  
9 465 2016;103(3):304-13.
- 10  
11  
12 466 18. Torossian A, Bräuer A, Höcker J, Bein B, Wulf H, Horn E-P. Preventing inadvertent  
13 467 perioperative hypothermia. *Dtsch Arztebl Int*. 2015;112(10):166-72.
- 14  
15  
16 468 19. Putnam K. Prevention of unplanned patient hypothermia. *AORN journal*. 2015;102(4):P11-P2.
- 17  
18  
19 469 20. Cohen S, Hayes JS, Tordella T, Puente I. Thermal efficiency of prewarmed cotton,  
20 470 reflective, and forced—warm-air inflatable blankets in trauma patients. *International Journal*  
21 471 *of Trauma Nursing*. 2002;8(1):4-8.
- 22  
23  
24 472 21. Hooper VD. Adoption of the ASPAN clinical guideline for the prevention of unplanned  
25 473 perioperative hypothermia: a data collection tool. *Journal of perianesthesia nursing : official*  
26 474 *journal of the American Society of PeriAnesthesia Nurses*. 2006;21(3):177-85.
- 27  
28  
29 475 22. Geiger TM, Horst S, Muldoon R, Wise PE, Enrenfeld J, Poulouse B, et al. Perioperative core  
30 476 body temperatures effect on outcome after colorectal resections. *The American Surgeon*.  
31 477 2012;78(5):607-12.
- 32  
33  
34 478 23. Burns SM, Wojnakowski M, Piotrowski K, Caraffa G. Unintentional hypothermia: implications for  
35 479 perianesthesia nurses. *Journal of PeriAnesthesia Nursing*. 2009;24(3):167-76.
- 36  
37  
38 480 24. Wagner DV. Unplanned perioperative hypothermia. *Aorn j*. 2006;83(2):470, 3-6.
- 39  
40  
41 481 25. Billeter AT, Hohmann SF, Druen D, Cannon R, Polk Jr HC. Unintentional perioperative  
42 482 hypothermia is associated with severe complications and high mortality in elective  
43 483 operations. *Surgery*. 2014;156(5):1245-52.
- 44  
45  
46 484 26. Pourrezaei S, Dinmohammadi M, Jafarirouhi A. The Effect of Thermal Care Workshop on  
47 485 EMS Staff Readiness in managing Accidental Hypothermia in Trauma Patients. *Preventive*  
48 486 *Care in Nursing and Midwifery Journal*. 2018;8(2):26-33.
- 49  
50  
51 487 27. Evans J, Kenkre J. Current practice and knowledge of nurses regarding patient temperature  
52 488 measurement. *Journal of medical engineering & technology*. 2006;30(4):218-23.
- 53  
54  
55 489 28. Bayleyegn B, Mehari A, Damtie D, Negash M. Knowledge, Attitude and Practice on  
56 490 Hospital-Acquired Infection Prevention and Associated Factors Among Healthcare Workers

- 1  
2  
3 491 at University of Gondar Comprehensive Specialized Hospital, Northwest Ethiopia. *Infection*  
4 and Drug Resistance. 2021;14:259.  
5 492  
6  
7 493 29. Yalew ZM, Zeleke H, Afenigus AD, Yitayew YA, Minuye B, Kassahun SA. Patient  
8 Experience in Nursing Care and Associated Factors Among Adult Admitted Patients in  
9 Debre Markos and Dessie Referral Hospitals, Amhara Region, Ethiopia, 2019. *Journal of*  
10 Patient Experience. 2020:2374373520966817.  
11 495  
12 496  
13 497 30. Engidaw MT, Gebremariam AD, Tiruneh SA, Asnakew DT, Abate BA. Chronic energy  
14 deficiency and its associated factors among lactating women in Debre Tabor general  
15 hospital, Northcentral Ethiopia. *Journal of Family Medicine and Health Care*. 2019;5(1):1-7.  
16 498  
17 499  
18 500 31. Ayalew E, Workineh Y. Nurses' intention to leave their job and associated factors in Bahir  
19 Dar, Amhara Region, Ethiopia, 2017. *BMC nursing*. 2020;19:1-7.  
20 501  
21 502 32. Tarekegn F, Asfaw G, Mossie M. Perioperative mortality at Tibebe Ghion Specialized  
22 Teaching Hospital, Ethiopia: A longitudinal study design. *International Journal of Surgery*  
23 Open. 2020;26:81-5.  
24 503  
25 504  
26 505 33. Ayalew F, Kibwana S, Shawula S, Misganaw E, Abose Z, Van Roosmalen J, et al.  
27 Understanding job satisfaction and motivation among nurses in public health facilities of  
28 Ethiopia: a cross-sectional study. *BMC nursing*. 2019;18(1):1-13.  
29 506  
30 507  
31 508 34. Harper CM. *Clinical Approaches to the Prevention of Inadvertent Perioperative*  
32 Hypothermia: University of Portsmouth; 2016.  
33 509  
34 510 35. Link T. Guidelines in practice: hypothermia prevention. *AORN journal*. 2020;111(6):653-66.  
35 511  
36 512 36. Ireland S, Murdoch K, Ormrod P, Saliba E, Endacott R, Fitzgerald M, et al. Nursing and  
37 medical staff knowledge regarding the monitoring and management of accidental or  
38 exposure hypothermia in adult major trauma patients. *International journal of nursing*  
39 practice. 2006;12(6):308-18.  
40 513  
41 514  
42 515 37. Block J, Lilienthal M, Cullen L, White A. Evidence-based thermoregulation for adult  
43 trauma patients. *Critical care nursing quarterly*. 2012;35(1):50-63.  
44 516  
45 517 38. Tamrakar P. Preventing Intraoperative and Postoperative Hypothermia. 2021.  
46 518  
47 519 39. Hegarty J, Walsh E, Burton A, Murphy S, O'gorman F, McPolin G. Nurses' knowledge of  
48 inadvertent hypothermia. *Aorn Journal*. 2009;89(4):701-13.  
49  
50  
51  
52  
53  
54  
55  
56  
57  
58  
59  
60

- 1  
2  
3 520 40. Chaghari M, Saffari M, Ebadi A, Ameryoun A. Empowering education: A new model for  
4  
5 521 in-service training of nursing staff. *Journal of advances in medical education &*  
6  
7 522 *professionalism*. 2017;5(1):26.
- 8  
9 523 41. de Araujo Püschel VA. Knowledge of hypothermia in nursing professionals of surgical  
10  
11 524 *center*. *Revista da Escola de Enfermagem da USP*. 2012;46(1):123-9.
- 12 525 42. Geleto A, Baraki N, Atomsa GE, Dessie Y. Job satisfaction and associated factors among  
13  
14 526 health care providers at public health institutions in Harari region, eastern Ethiopia: a cross-  
15  
16 527 sectional study. *BMC Research Notes*. 2015;8(1):1-7.
- 17 528 43. Oyira EJ, Ella R, Chukwudi UE, Paulina AI. Knowledge Practice and Outcome of Quality  
18  
19 529 Nursing Care among Nurses in University of Calabar Teaching Hospital (UCTH). *Journal of*  
20  
21 530 *Education and Training Studies*. 2016;4(11):179-93.
- 22 531 44. Hinkle JL, Cheever KH. *Brunner and Suddarth's textbook of medical-surgical nursing:*  
23  
24 532 *Wolters kluwer india Pvt Ltd; 2018.*

25  
26 533  
27  
28  
29  
30  
31  
32  
33  
34  
35  
36  
37  
38  
39  
40  
41  
42  
43  
44  
45  
46  
47  
48  
49  
50  
51  
52  
53  
54  
55  
56  
57  
58  
59  
60

Supplemental Table: Institutional and other related factors of the respondents on perioperative hypothermia prevention in Amhara Regional State Referral Hospitals, Northwest Ethiopia, 2021 (N=413).

| Variable                                           | Response         | Frequency (N=413) | Percentage (%) |
|----------------------------------------------------|------------------|-------------------|----------------|
| Working place (hospital)                           | TGSRH            | 84                | 20.3           |
|                                                    | UoGCSRH          | 83                | 20.1           |
|                                                    | DMCRH            | 73                | 17.7           |
|                                                    | DTCRH            | 47                | 11.4           |
|                                                    | FHRH             | 126               | 30.5           |
| Ward:                                              | Emergency        | 103               | 24.9           |
|                                                    | Recovery         | 39                | 9.4            |
|                                                    | OR               | 102               | 24.7           |
|                                                    | ICU              | 53                | 12.8           |
|                                                    | Orthopedics ward | 46                | 11.1           |
|                                                    | Surgical ward    | 70                | 16.9           |
| Daily working hours                                | ≤ 8 hrs.         | 354               | 85.7           |
|                                                    | ≥9 hrs.          | 59                | 14.3           |
| Training on hypothermia prevention                 | Yes              | 145               | 35.1           |
|                                                    | No               | 268               | 64.9           |
| Presence of protocol/guideline                     | Yes              | 121               | 29.3           |
|                                                    | No               | 292               | 70.7           |
| Reading updated evidence on hypothermia prevention | Yes              | 206               | 49.9           |
|                                                    | No               | 207               | 50.1           |

| Variable                        | Response     | Frequency (N=413) | Percentage (%) |
|---------------------------------|--------------|-------------------|----------------|
| Availability of thermometer     | Yes          | 145               | 35.1           |
|                                 | No           | 268               | 64.9           |
| Constraints of warming material | Yes          | 342               | 82.8           |
|                                 | No           | 71                | 17.2           |
| Shortage of blanket             | Yes          | 166               | 40.2           |
|                                 | No           | 247               | 59.8           |
| Shortage of linens              | Yes          | 89                | 21.5           |
|                                 | No           | 324               | 78.5           |
| Shortage of fluid warmer        | Yes          | 132               | 32.0           |
|                                 | No           | 281               | 68.0           |
| Shortage of air warmer/heater   | Yes          | 212               | 51.3           |
|                                 | No           | 201               | 48.7           |
| Shortage of warmer blanket      | Yes          | 217               | 52.5           |
|                                 | No           | 196               | 47.5           |
| Job satisfaction                | Satisfied    | 217               | 52.5           |
|                                 | Dissatisfied | 196               | 47.5           |

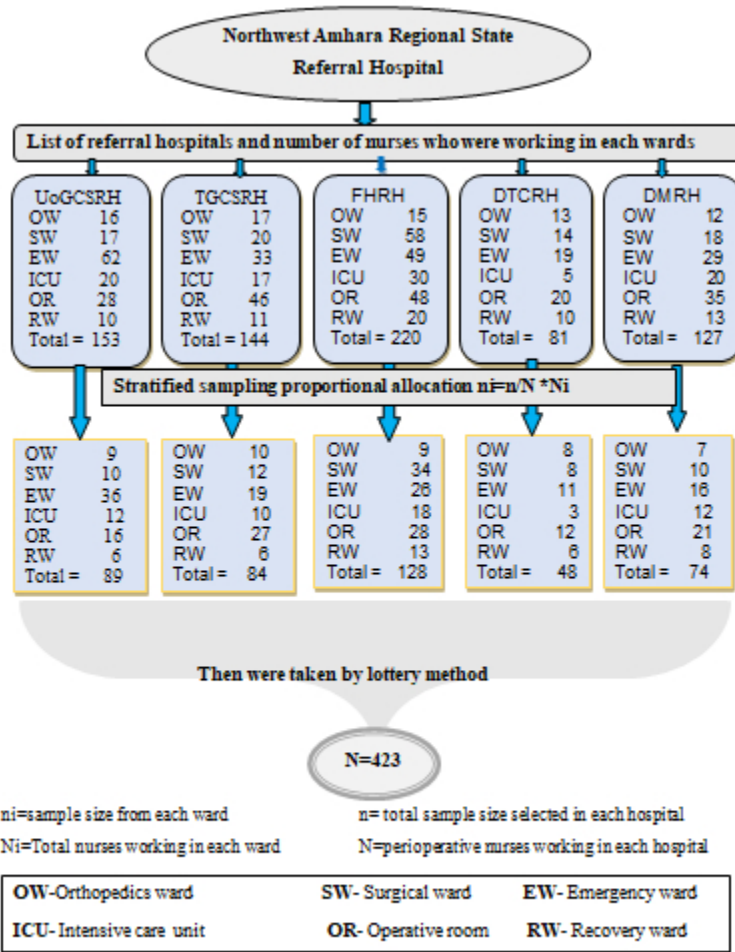

Supplemental Figure: Schematic presentation of sampling procedure of nurses' knowledge and practice, and associated factors on hypothermia prevention among surgical patients.

315x352mm (38 x 38 DPI)

## Annex I. Instruments (questionnaire)

Introduction: This instrument is divided into 3 sections. Section 1 is related to your Personal data including job satisfaction. Section 2 is your knowledge regarding Perioperative hypothermia prevention (PHP). Section 3 is your practice regarding PHP.

Identification number: \_\_\_\_\_

### I. Socio-demographic, institutional and other characteristics of study participants

1. Gender: Male  Female
2. Age: \_\_\_\_\_
3. Marital status A- Single B- Married C- Divorced D- Widowed
4. Educational level: A- Diploma B- Degree C- Masters
5. Working experience in days/months/years: \_\_\_\_\_
6. Working place (hospital) \_\_\_\_\_
7. Working unit or ward: \_\_\_\_\_
8. Daily working hours \_\_\_\_\_
9. Monthly salary \_\_\_\_\_
10. Did you receive any in service training on perioperative hypothermia prevention?  
Yes  No
11. Do you have guidelines related to hypothermia prevention in your workplace?  
Yes  No
12. Do you read journals on hypothermia prevention? Yes  No
13. Is there any shortage of thermometers? Yes  No
14. Is there any other resource constraints, which are important for the prevention of?  
Hypothermia prevention? Yes  No
15. If yes, what type of resource constraints? You can circle greater than one answer if appropriate



A. Blanket B. Linens C. Fluid warmer D. Air warmer/heater E. Blanket warmer

**16. Job satisfaction; Please tick one ( ) as per your choice**

| <i>Job Satisfaction questions</i> |                                                                                 | Strongly Agree 5 | Agree 4 | Neither 3 | Disagree 2 | Strongly disagree 1 |
|-----------------------------------|---------------------------------------------------------------------------------|------------------|---------|-----------|------------|---------------------|
| 1                                 | I have a work plan developed with my supervisor                                 |                  |         |           |            |                     |
| 2                                 | My supervisor gives me feedback to improve my performance                       |                  |         |           |            |                     |
| 3                                 | I get the opportunity to be involved in my performance appraisal                |                  |         |           |            |                     |
| 4                                 | my supervisor/head nurse does a good job                                        |                  |         |           |            |                     |
| 5                                 | I have the opportunity to work independently on my job                          |                  |         |           |            |                     |
| 6                                 | I have good feeling towards my job accomplishment                               |                  |         |           |            |                     |
| 7                                 | I have a chance for a variety of job responsibilities                           |                  |         |           |            |                     |
| 8                                 | There is good flexibility for shift works                                       |                  |         |           |            |                     |
| 9                                 | I have good relationship with my coworkers                                      |                  |         |           |            |                     |
| 10                                | I have good relationship with my supervisor and physicians.                     |                  |         |           |            |                     |
| 11                                | There is good team work spirit in my department                                 |                  |         |           |            |                     |
| 12                                | There is good communication between from managers, to employees in the hospital |                  |         |           |            |                     |
| 13                                | I got sufficient support during my health problem                               |                  |         |           |            |                     |
| 14                                | There is good safety practice in the hospital                                   |                  |         |           |            |                     |
| 15                                | I have a sense of job security                                                  |                  |         |           |            |                     |
| 16                                | I have the materials and equipment that need to do my work right.               |                  |         |           |            |                     |
| 17                                | The mission of my organization makes me feel my job is important.               |                  |         |           |            |                     |
| 18                                | I have got recognition for my good work                                         |                  |         |           |            |                     |
| 19                                | There is a fair chance for promotion                                            |                  |         |           |            |                     |
| 20                                | I have training that I need to do my job                                        |                  |         |           |            |                     |
| 21                                | The hospital provides fair training opportunity                                 |                  |         |           |            |                     |
| 22                                | There is high rate of turnover in the hospital                                  |                  |         |           |            |                     |

|    |                                                                                                            |  |  |  |  |  |
|----|------------------------------------------------------------------------------------------------------------|--|--|--|--|--|
| 23 | High absenteeism is seen in some employee                                                                  |  |  |  |  |  |
| 24 | I feel stressed in my work                                                                                 |  |  |  |  |  |
| 25 | I am satisfied with my Salary                                                                              |  |  |  |  |  |
| 26 | My salary is comparable to others who performing the same or similar jobs                                  |  |  |  |  |  |
| 27 | My benefits like transport, housing and duty allowance, etc., are fair compared to other staff at my level |  |  |  |  |  |

## II. Questions related to knowledge of hypothermia prevention in perioperative patients.

Please select and Put ( ) in the box below for each question.

| Item no.      | Statements about perioperative hypothermia prevention                                                                                                                                                             | True | False | I Don't Know |
|---------------|-------------------------------------------------------------------------------------------------------------------------------------------------------------------------------------------------------------------|------|-------|--------------|
| <b>Part 1</b> | <b>General knowledge</b>                                                                                                                                                                                          |      |       |              |
| 1             | The internal environment of humans can be maintained by thermoregulation.                                                                                                                                         |      |       |              |
| 2             | Perioperative hypothermia at any time during the perioperative cycle is characterized as a core body temperature < 36 ° C                                                                                         |      |       |              |
| 3             | Anesthetic drugs increase heat loss in surgical patients.                                                                                                                                                         |      |       |              |
| 4             | Cold IV fluids and blood products increase heat loss.                                                                                                                                                             |      |       |              |
| 5             | Perioperative hypothermia is not associated with complications such as changes in drug metabolism, healing complications, shivering, clotting defects, cardiac morbidity, and prolonged post-anesthetic recovery. |      |       |              |
| 6             | To minimize surgical complications post-operatively, nurses should advise patients to bring along additional clothing to help them stay warm prior to surgery                                                     |      |       |              |
| 7             | The pulmonary artery catheter, distal esophagus, urinary bladder, rectum, zero heat-flux are some of the sites for temperature measurements.                                                                      |      |       |              |
| 8             | Nurses should be well trained and knowledgeable about the use of both temperature recording and warming devices                                                                                                   |      |       |              |
| 9             | Forced-air warming devices, warm water circulating devices and conductive devices are not some of the devices for warming surgical patients                                                                       |      |       |              |

|               |                                                                                                                                                                                            |  |  |  |
|---------------|--------------------------------------------------------------------------------------------------------------------------------------------------------------------------------------------|--|--|--|
| 10            | The method for temperature monitoring should not be chosen based on the criteria for a procedure                                                                                           |  |  |  |
| 11            | To ensure accurate information, the perioperative team takes the patient's temperature at 15- minute intervals using different measuring devices at different sites.                       |  |  |  |
| <b>Part 2</b> | <b>Preoperative hypothermia prevention</b>                                                                                                                                                 |  |  |  |
| 1             | Patients with a temperature below 36.0°C undergoing anesthesia & those having a high risk of cardiovascular complications are at higher risk for inadvertent perioperative hypothermia     |  |  |  |
| 2             | It is not necessary to measure patients' temperature in the hour before departing the ward since it will be measured at the theatre.                                                       |  |  |  |
| 3             | Except in urgent circumstances, preoperative patients with temperatures of less than 36.0°C should be warmed for 30 minutes using active warming methods.                                  |  |  |  |
| 4             | Special attention should be given to the comfort of surgical patients having difficulties expressing themselves                                                                            |  |  |  |
| 5             | The method for warming surgical patients should be chosen based on the planned surgical procedure, positioning of the patient, Intravenous access site, and warming equipment constraints. |  |  |  |
| <b>Part 3</b> | <b>Intraoperative hypothermia prevention</b>                                                                                                                                               |  |  |  |
| 1             | Critical incidence reporting is not necessary for patients coming into the theatre with a temperature of less than 36.0°C.                                                                 |  |  |  |
| 2             | Induction of anesthesia should not begin unless the patient's temperature is 36.0°C or above (unless there is a need to expedite surgery because of clinical urgency).                     |  |  |  |
| 3             | The theatre's room temperature should be at least 21°C which can be adjusted to allow better working once active warming is initiated.                                                     |  |  |  |
| 4             | All irrigation fluids used intraoperative should be warmed in a thermostatically controlled cabinet to a temperature of 38°C to 40°C.                                                      |  |  |  |
| 5             | Fluid warming devices should be used to warm Intravenous fluids (500mls or more) & blood products to 37°C                                                                                  |  |  |  |
| 6             | Regardless of the temperatures of patients before leaving the ward or emergency department, they should be warmed using active warming method once in the theatre                          |  |  |  |

|               |                                                                                                                                                                 |  |  |  |
|---------------|-----------------------------------------------------------------------------------------------------------------------------------------------------------------|--|--|--|
| 7             | The surgical patient should be well covered throughout surgery to conserve heat and only be exposed during surgical preparation.                                |  |  |  |
| <b>Part 4</b> | <b>Post-operative hypothermia prevention</b>                                                                                                                    |  |  |  |
| 1             | During the postoperative period, hypothermic patients should be warmed using active warming method until they become warm before transferring them to the ward. |  |  |  |
| 2             | Patients should be provided with at least 1 cotton sheet, 2 blankets, or a duvet during the postoperative phase                                                 |  |  |  |
| 3             | Whiles in the theatre, the patients' temperature should be measured every 15 minutes and every 30 minutes while in the recovery room.                           |  |  |  |
| 4             | The temperature of post-operative patients should be recorded on arrival to the ward and be taken and documented as part of a routine four hourly observations. |  |  |  |

### III- Questions related to practice of hypothermia prevention in perioperative patients.

Please select and Put ( ) in the box below for each *question*.

| Hypothermia prevention practices                                                                                                                                                                 | Never/0 | Sometimes/1 | Always/2 |
|--------------------------------------------------------------------------------------------------------------------------------------------------------------------------------------------------|---------|-------------|----------|
| 1. Do you measure temperature as soon as patient arrival?                                                                                                                                        |         |             |          |
| 2. Do you measure temperature regularly according to guidelines recommendation (for preoperative patient every 1hr, intraoperative every 30', recovery every 15' and post-operative every 4hrs)? |         |             |          |
| 3. Do you warm intravenous, blood products, and irrigation fluids using warming devices before administering to patients?                                                                        |         |             |          |
| 4. Do you cover the mattress plastic sheet with dry linen before patient admission?                                                                                                              |         |             |          |
| 5. Do you use forced-air warming devices, warm water circulating devices, and conductive devices for warming surgical patients?                                                                  |         |             |          |
| 6. Do you communicate your assessment findings on factors that could lead to perioperative hypothermia to all members of the perioperative team?                                                 |         |             |          |

|                            |                                                                                                                         |  |  |  |
|----------------------------|-------------------------------------------------------------------------------------------------------------------------|--|--|--|
| 1<br>2<br>3<br>4           | 7. Do you advise patients to inform you when they feel cold during their hospitalization?                               |  |  |  |
| 5<br>6<br>7<br>8           | 8. Do you develop and implement the care plan for perioperative hypothermia prevention?                                 |  |  |  |
| 9<br>10<br>11<br>12        | 9. Do you document the site for temperature measurement in the patients' file?                                          |  |  |  |
| 13<br>14<br>15             | 10. Do you maintain ambient room temperature according to the guideline?                                                |  |  |  |
| 16<br>17<br>18             | 11. Do you assess patients for their risk for perioperative hypothermia?                                                |  |  |  |
| 19<br>20<br>21             | 12. Do you assess for signs and symptoms of hypothermia?                                                                |  |  |  |
| 22<br>23                   | 13. Do you advise patients to stay warm prior to surgery?                                                               |  |  |  |
| 24<br>25<br>26<br>27<br>28 | 14. Do you include thermoregulation interventions and patient-related care to thermoregulation in your hand-over report |  |  |  |

**STROBE Statement—checklist of items that should be included in reports of observational studies**

|                           | <b>Item No.</b> | <b>Recommendation</b>                                                                               | <b>Page No.</b> | <b>Relevant text from manuscript</b>                                                                                                                                                                                                      |
|---------------------------|-----------------|-----------------------------------------------------------------------------------------------------|-----------------|-------------------------------------------------------------------------------------------------------------------------------------------------------------------------------------------------------------------------------------------|
| <b>Title and abstract</b> | 1               | (a) Indicate the study’s design with a commonly used term in the title or the abstract              | 1               | Line (1-3); An institution-based cross-sectional study was conducted for the title of Knowledge and Practice of nurses on Perioperative Hypothermia Prevention at Northwest Amhara Regional State Referral Hospitals, Northwest Ethiopia: |
|                           |                 | (b) Provide in the abstract an informative and balanced summary of what was done and what was found | 2               | Lines (21 – 47); Abstract                                                                                                                                                                                                                 |
| <b>Introduction</b>       |                 |                                                                                                     |                 |                                                                                                                                                                                                                                           |
| Background/ratio nale     | 2               | Explain the scientific background and rationale for the investigation being reported                | 3 4, 5 and 6    | Lines (56– 117); Introduction                                                                                                                                                                                                             |
| Objectives                | 3               | State-specific objectives, including any pre-specified hypotheses                                   | 6               | Lines (115 – 117); This study aimed to assess nurses’ knowledge, practice, and their determinant factors of perioperative hypothermia prevention in Northwest Amhara Regional State Referral Hospitals, Northwest Ethiopia.               |
| <b>Methods</b>            |                 |                                                                                                     |                 |                                                                                                                                                                                                                                           |
| Study design              | 4               | Present key elements of study design early in the paper                                             | 6               | Lines (120 – 121); An institutional-based cross-sectional study was conducted in five referral hospitals' perioperative units or                                                                                                          |

|                              |   |                                                                                                                                                                                                                                                                                                                                                                                                                                                       |         |                                                                                                                                                                                                                                                                                                                                                                                                     |
|------------------------------|---|-------------------------------------------------------------------------------------------------------------------------------------------------------------------------------------------------------------------------------------------------------------------------------------------------------------------------------------------------------------------------------------------------------------------------------------------------------|---------|-----------------------------------------------------------------------------------------------------------------------------------------------------------------------------------------------------------------------------------------------------------------------------------------------------------------------------------------------------------------------------------------------------|
|                              |   |                                                                                                                                                                                                                                                                                                                                                                                                                                                       |         | wards from March 25 to May 20, 2021.                                                                                                                                                                                                                                                                                                                                                                |
| Setting                      | 5 | Describe the setting, locations, and relevant dates, including periods of recruitment, exposure, follow-up, and data collection                                                                                                                                                                                                                                                                                                                       | 6 and 7 | Lines (122 – 138); Study setting                                                                                                                                                                                                                                                                                                                                                                    |
| Participants                 | 6 | (a) Cohort study—Give the eligibility criteria, and the sources and methods of selection of participants. Describe methods of follow-up<br><br>Case-control study—Give the eligibility criteria, and the sources and methods of case ascertainment and control selection. Give the rationale for the choice of cases and controls<br><br>Cross-sectional study—Give the eligibility criteria and the sources and methods of selection of participants | 7 and 8 | Lines (140 – 145); Source and study population<br><br>Lines (146– 150); Inclusion and exclusion criteria (eligibility criteria)<br><br>Lines (156 – 164); The study participants were recruited using a stratified sampling technique. Initially, the study participants are stratified by hospital and working ward or unit, and the required sample for each stratum is allocated proportionally. |
|                              |   | (b) Cohort study—For matched studies, give matching criteria and number of exposed and unexposed<br><br>Case-control study—For matched studies, give matching criteria and the number of controls per case                                                                                                                                                                                                                                            | N/A     | This was a cross-sectional study                                                                                                                                                                                                                                                                                                                                                                    |
| Variables                    | 7 | Clearly define all outcomes, exposures, predictors, potential confounders, and effect modifiers. Give diagnostic criteria, if applicable                                                                                                                                                                                                                                                                                                              | 8 and 9 | Lines (165 – 178); Variables and measurements                                                                                                                                                                                                                                                                                                                                                       |
| Data sources/<br>measurement | 8 | For each variable of interest, give sources of data and details of methods of assessment (measurement). Describe comparability of assessment methods if there is more than one group                                                                                                                                                                                                                                                                  | 9       | Lines (179 – 186); Data collection tools and procedures                                                                                                                                                                                                                                                                                                                                             |

|                        |    |                                                                                                                              |          |                                                                                                                                                                                                                                                                                                                                                                                                                                                                |
|------------------------|----|------------------------------------------------------------------------------------------------------------------------------|----------|----------------------------------------------------------------------------------------------------------------------------------------------------------------------------------------------------------------------------------------------------------------------------------------------------------------------------------------------------------------------------------------------------------------------------------------------------------------|
| Bias                   | 9  | Describe any efforts to address potential sources of bias                                                                    | 9 and 10 | Lines (187–196); To assure the quality of the data, the questionnaire was prepared in English first, then translated to Amharic (local language), and then translated back to English to check its consistency. One-day training on the purpose of the study and the data collection procedure was provided to the data collectors and supervisors. Additionally, the tool was pretested at Woldia Comprehensive Referral Hospital with 5% of the sample size. |
| Study size             | 10 | Explain how the study size was arrived at                                                                                    | 8        | Lines (152–155); The sample size was calculated using the single population proportion formula $(n = \frac{Z^2 * P * (1-P)}{d^2})$ . A 50% proportion of nurses' knowledge and practice on hypothermia prevention, 95% confidence level, and 5% expected margin of error (d) were used. By considering a 10% non-response rate, the final sample becomes 423.                                                                                                  |
| Quantitative variables | 11 | Explain how quantitative variables were handled in the analyses. If applicable, describe which groupings were chosen and why | 10       | Lines (204–210); Binary logistic regression was used to determine the significant association between the independent and dependent variables. Those independent variables, less than                                                                                                                                                                                                                                                                          |



|                     |    |                                                                                                                                                                                                                                                                                           |     |                                                                                                                                                                                                                                                                                                                                                                                                                                                                                                                                                                                                                                                    |
|---------------------|----|-------------------------------------------------------------------------------------------------------------------------------------------------------------------------------------------------------------------------------------------------------------------------------------------|-----|----------------------------------------------------------------------------------------------------------------------------------------------------------------------------------------------------------------------------------------------------------------------------------------------------------------------------------------------------------------------------------------------------------------------------------------------------------------------------------------------------------------------------------------------------------------------------------------------------------------------------------------------------|
|                     |    |                                                                                                                                                                                                                                                                                           |     | 0.2 in bivariable analysis, were entered into multivariable logistic regressions. The association between the independent and dependent variables was considered significant if the P-value was less than 0.05 from multivariate logistic regression analysis. AOR with 95% CI and a p-value of < 0.05 were used to declare associated factors with the knowledge and practice of nurses on hypothermia prevention.                                                                                                                                                                                                                                |
| Statistical methods | 12 | (a) Describe all statistical methods, including those used to control for confounding                                                                                                                                                                                                     | 10  | Lines (198–210); Statistical Analysis                                                                                                                                                                                                                                                                                                                                                                                                                                                                                                                                                                                                              |
|                     |    | (b) Describe any methods used to examine subgroups and interactions                                                                                                                                                                                                                       | N/A | There were no subgroups                                                                                                                                                                                                                                                                                                                                                                                                                                                                                                                                                                                                                            |
|                     |    | (c) Explain how missing data were addressed                                                                                                                                                                                                                                               | N/A | There was no missing data                                                                                                                                                                                                                                                                                                                                                                                                                                                                                                                                                                                                                          |
|                     |    | (d) Cohort study—If applicable, explain how loss to follow-up was addressed<br><br>Case-control study—If applicable, explain how matching of cases and controls was addressed<br><br>Cross-sectional study—If applicable, describe analytical methods taking account of sampling strategy | 8   | Lines (156– 164); The study participants were recruited using a stratified sampling technique. Initially, the study participants are stratified by hospital and working ward or unit, and the required sample for each stratum is allocated proportionally. According to all hospitals' human resources and administration reports, the total number of nurses working in these units or wards was 725. The calculated sample size was then proportionally allocated to each hospital according to the number of nurses working in the respective departments or wards (i.e. from 153, 89 in UoGCSRH, from 144, 84 in TGRH, from 220, 128 in FHRH, |

|                  |     |                                                                                                                                                                                                   |           |                                                                                                                                                                                                                                                                                                                                            |
|------------------|-----|---------------------------------------------------------------------------------------------------------------------------------------------------------------------------------------------------|-----------|--------------------------------------------------------------------------------------------------------------------------------------------------------------------------------------------------------------------------------------------------------------------------------------------------------------------------------------------|
|                  |     |                                                                                                                                                                                                   |           | from 81, 48 in DTRH, and from 127, 74 nurses in DMRH). Finally, study participants were chosen using a simple random sampling technique from each sampling frame                                                                                                                                                                           |
|                  |     | (e) Describe any sensitivity analyses                                                                                                                                                             | N/A       |                                                                                                                                                                                                                                                                                                                                            |
| <b>Results</b>   |     |                                                                                                                                                                                                   |           |                                                                                                                                                                                                                                                                                                                                            |
| Participants     | 13* | (a) Report numbers of individuals at each stage of study—eg numbers potentially eligible, examined for eligibility, confirmed eligible, included in the study, completing follow-up, and analysed | N/A       | This was a cross-sectional study with only one stage.                                                                                                                                                                                                                                                                                      |
|                  |     | (b) Give reasons for non-participation at each stage                                                                                                                                              | N/A       |                                                                                                                                                                                                                                                                                                                                            |
|                  |     | (c) Consider use of a flow diagram                                                                                                                                                                | N/A       |                                                                                                                                                                                                                                                                                                                                            |
| Descriptive data | 14* | (a) Give characteristics of study participants (eg demographic, institutional, other) and information on exposures and potential confounders                                                      | 11 and 12 | Line (216-221); Table 1: Socio-demographic characteristics of the study participants on hypothermia prevention among perioperative patients in Amhara Regional State Referral Hospitals, Northwest Ethiopia, 2021(N=413).<br><br>Line (225-230); <b>Institutional and job-related factors of the respondents</b> of the study participants |
|                  |     | (b) Indicate number of participants with missing data for each variable of interest                                                                                                               | N/A       | There was no missing data                                                                                                                                                                                                                                                                                                                  |
|                  |     | (c) Cohort study—Summarise follow-up time (eg, average and total amount)                                                                                                                          | N/A       | This was a cross-sectional study                                                                                                                                                                                                                                                                                                           |
| Outcome data     | 15* | Cohort study—Report numbers of outcome events or                                                                                                                                                  | N/A       | This was cross-sectional study                                                                                                                                                                                                                                                                                                             |

|              |    |                                                                                                                                                                                                              |                   |                                                                                                                                                                                                                                                                                                                                                                                                                                                                                                                                                                                                                                                                         |
|--------------|----|--------------------------------------------------------------------------------------------------------------------------------------------------------------------------------------------------------------|-------------------|-------------------------------------------------------------------------------------------------------------------------------------------------------------------------------------------------------------------------------------------------------------------------------------------------------------------------------------------------------------------------------------------------------------------------------------------------------------------------------------------------------------------------------------------------------------------------------------------------------------------------------------------------------------------------|
|              |    | summary measures over time                                                                                                                                                                                   |                   |                                                                                                                                                                                                                                                                                                                                                                                                                                                                                                                                                                                                                                                                         |
|              |    | Case-control study—Report numbers in each exposure category, or summary measures of exposure                                                                                                                 | N/A               | This was a cross-sectional study                                                                                                                                                                                                                                                                                                                                                                                                                                                                                                                                                                                                                                        |
|              |    | Cross-sectional study—Report numbers of outcome events or summary measures                                                                                                                                   | 12, 13, and 14    | Lines (233–234); In this study, 244 (59.1%) with 95% CI: (54.7, 63.7) of the participants had good knowledge<br>Lines (243–245); In this study, 208 (50.4%) with 95% CI: (45.5, 55) of the participants had good practice.                                                                                                                                                                                                                                                                                                                                                                                                                                              |
| Main results | 16 | (a) Give unadjusted estimates and, if applicable, confounder-adjusted estimates and their precision (eg, 95% confidence interval). Make clear which confounders were adjusted for and why they were included | 12, 14, 16 and 18 | Lines (233-234); In this study, 244 (59.1%) with 95% CI: (54.7, 63.7) of the participants had good knowledge<br>Lines (243-245); In this study, 208 (50.4%) with 95% CI: (45.5, 55) of the participants had a good practice.<br>Lines (260-261); Table 4- Bi-variable and multivariable analysis of factors associated with knowledge of nurses on perioperative hypothermia prevention in Amhara Region Referral Hospitals, Northwest Ethiopia.<br>Lines (273-275); Table 5- Bi-variable and multivariable analysis of factors associated with the practice of nurses on perioperative hypothermia prevention in Amhara Region Referral Hospitals, Northwest Ethiopia. |
|              |    | (b) Report category boundaries when continuous variables were categorized                                                                                                                                    | N/A               | There was no continuous variable.                                                                                                                                                                                                                                                                                                                                                                                                                                                                                                                                                                                                                                       |
|              |    | (c) If relevant, consider translating estimates of relative                                                                                                                                                  | N/A               | There was no estimate of relative risk.                                                                                                                                                                                                                                                                                                                                                                                                                                                                                                                                                                                                                                 |

|                   |    |                                                                                                                                                                            |           |                                                                                                                                                                                                                                                                                                                                                                                                                                                                                                                                                                                        |
|-------------------|----|----------------------------------------------------------------------------------------------------------------------------------------------------------------------------|-----------|----------------------------------------------------------------------------------------------------------------------------------------------------------------------------------------------------------------------------------------------------------------------------------------------------------------------------------------------------------------------------------------------------------------------------------------------------------------------------------------------------------------------------------------------------------------------------------------|
|                   |    | risk into absolute risk for a meaningful time period                                                                                                                       |           |                                                                                                                                                                                                                                                                                                                                                                                                                                                                                                                                                                                        |
| Other analyses    | 17 | Report other analyses done—eg analyses of subgroups and interactions, and sensitivity analyses                                                                             | N/A       | There was no sub groups and sensitivity analysis.                                                                                                                                                                                                                                                                                                                                                                                                                                                                                                                                      |
| <b>Discussion</b> |    |                                                                                                                                                                            |           |                                                                                                                                                                                                                                                                                                                                                                                                                                                                                                                                                                                        |
| Key results       | 18 | Summarise key results with reference to study objectives                                                                                                                   | 20-23     | Lines (277–354); Discussion                                                                                                                                                                                                                                                                                                                                                                                                                                                                                                                                                            |
| Limitations       | 19 | Discuss limitations of the study, taking into account sources of potential bias or imprecision. Discuss both direction and magnitude of any potential bias                 | 23 and 24 | Lines (355–361); This study was not triangulated with a qualitative method. The study also might be prone to social desirability bias, which was minimized through the use of self-administered questionnaires. In addition, the content validity of the questionnaires was not formally assessed by independent experts. Despite the study being conducted in a multi-center setting or covering a large area, the research findings may not be generalized beyond the study setting, like at a national or global level, because no sample was collected outside our study settings. |
| Interpretation    | 20 | Give a cautious overall interpretation of results considering objectives, limitations, multiplicity of analyses, results from similar studies, and other relevant evidence | 20-24     | Lines (277-361); Discussion and limitation                                                                                                                                                                                                                                                                                                                                                                                                                                                                                                                                             |
| Generalizability  | 21 | Discuss the generalizability (external validity) of the study results                                                                                                      | 24        | Lines (363-368); This study revealed that the knowledge and                                                                                                                                                                                                                                                                                                                                                                                                                                                                                                                            |

|                          |    |                                                                                                                                                               |    |                                                                                                                                                                                                                                                                                                                                                                                                                                                                                                                             |
|--------------------------|----|---------------------------------------------------------------------------------------------------------------------------------------------------------------|----|-----------------------------------------------------------------------------------------------------------------------------------------------------------------------------------------------------------------------------------------------------------------------------------------------------------------------------------------------------------------------------------------------------------------------------------------------------------------------------------------------------------------------------|
|                          |    |                                                                                                                                                               |    | <p>practice of nurses on the prevention of perioperative hypothermia in the study area was inadequate compared to the recommended guidelines. Higher educational status, being male, and attending training were significantly associated with good knowledge of nurses on perioperative hypothermia prevention. Concurrently, nurse's working wards, training opportunities, job satisfaction, and nurses' knowledge were the factors contributing to good practice of nurses in preventing perioperative hypothermia.</p> |
| <b>Other information</b> |    |                                                                                                                                                               |    |                                                                                                                                                                                                                                                                                                                                                                                                                                                                                                                             |
| Funding                  | 22 | Give the source of funding and the role of the funders for the present study and, if applicable, for the original study on which the present article is based | 26 | Lines (404)-This research received no specific grant from any funding agency in the public, commercial, or not-for-profit sectors.                                                                                                                                                                                                                                                                                                                                                                                          |

\*Give information separately for cases and controls in case-control studies and, if applicable, for exposed and unexposed groups in cohort and cross-sectional studies.
