# Supplementary material for: Knowledge and practice of nurses with respect to perioperative hypothermia prevention in the Northwest Amhara Regional State Referral Hospitals, Ethiopia: a cross-sectional study
Source: PubMed Central journal article supplement — BMJ Open. 2023 Dec 13;13(12):e068131. doi: 10.1136/bmjopen-2022-068131 (PMC10729143; doi:10.1136/bmjopen-2022-068131), 2023-12-13
Supplement: bmjopen-2022-068131supp001.pdf [file bmjopen-2022-068131supp001.pdf]

Supplemental Table: Institutional and other related factors of the respondents on perioperative hypothermia prevention in Amhara Regional State Referral Hospitals, Northwest Ethiopia, 2021 (N=413).

| Variable                                           | Response         | Frequency (N=413) | Percentage (%) |
|----------------------------------------------------|------------------|-------------------|----------------|
| Working place (hospital)                           | TGSRH            | 84                | 20.3           |
|                                                    | UoGCSRH          | 83                | 20.1           |
|                                                    | DMCRH            | 73                | 17.7           |
|                                                    | DTCRH            | 47                | 11.4           |
|                                                    | FHRH             | 126               | 30.5           |
| Ward:                                              | Emergency        | 103               | 24.9           |
|                                                    | Recovery         | 39                | 9.4            |
|                                                    | OR               | 102               | 24.7           |
|                                                    | ICU              | 53                | 12.8           |
|                                                    | Orthopedics ward | 46                | 11.1           |
|                                                    | Surgical ward    | 70                | 16.9           |
| Daily working hours                                | ≤ 8 hrs.         | 354               | 85.7           |
|                                                    | ≥9 hrs.          | 59                | 14.3           |
| Training on hypothermia prevention                 | Yes              | 145               | 35.1           |
|                                                    | No               | 268               | 64.9           |
| Presence of protocol/guideline                     | Yes              | 121               | 29.3           |
|                                                    | No               | 292               | 70.7           |
| Reading updated evidence on hypothermia prevention | Yes              | 206               | 49.9           |
|                                                    | No               | 207               | 50.1           |

---

| Variable                        | Response     | Frequency (N=413) | Percentage (%) |
|---------------------------------|--------------|-------------------|----------------|
| Availability of thermometer     | Yes          | 145               | 35.1           |
|                                 | No           | 268               | 64.9           |
| Constraints of warming material | Yes          | 342               | 82.8           |
|                                 | No           | 71                | 17.2           |
| Shortage of blanket             | Yes          | 166               | 40.2           |
|                                 | No           | 247               | 59.8           |
| Shortage of linens              | Yes          | 89                | 21.5           |
|                                 | No           | 324               | 78.5           |
| Shortage of fluid warmer        | Yes          | 132               | 32.0           |
|                                 | No           | 281               | 68.0           |
| Shortage of air warmer/heater   | Yes          | 212               | 51.3           |
|                                 | No           | 201               | 48.7           |
| Shortage of warmer blanket      | Yes          | 217               | 52.5           |
|                                 | No           | 196               | 47.5           |
| Job satisfaction                | Satisfied    | 217               | 52.5           |
|                                 | Dissatisfied | 196               | 47.5           |

---
