# Supplementary material for: Knowledge and practice of nurses with respect to perioperative hypothermia prevention in the Northwest Amhara Regional State Referral Hospitals, Ethiopia: a cross-sectional study
Source: PubMed Central journal article supplement — BMJ Open. 2023 Dec 13;13(12):e068131. doi: 10.1136/bmjopen-2022-068131 (PMC10729143; doi:10.1136/bmjopen-2022-068131), 2023-12-13
Supplement: bmjopen-2022-068131supp003.pdf [file bmjopen-2022-068131supp003.pdf]

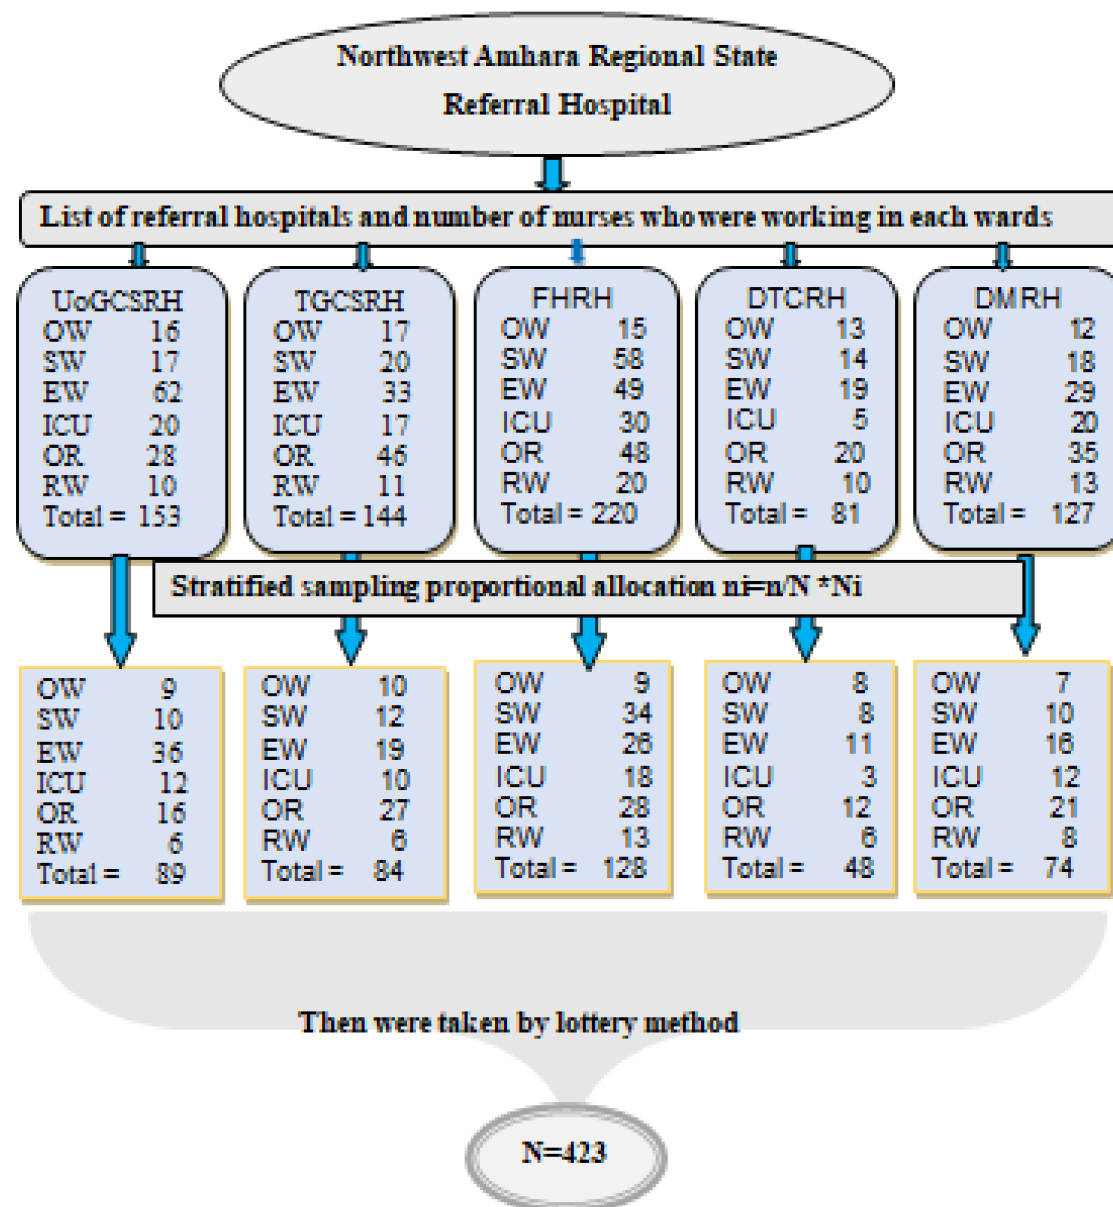

$n_i$ =sample size from each ward

$n$ = total sample size selected in each hospital

$N_i$ =Total nurses working in each ward

$N$ =perioperative nurses working in each hospital

**OW**-Orthopedics ward

**SW**- Surgical ward

**EW**- Emergency ward

**ICU**- Intensive care unit

**OR**- Operative room

**RW**- Recovery ward

**Supplemental Figure: Schematic presentation of sampling procedure of nurses' knowledge and practice, and associated factors on hypothermia prevention among surgical patients.**
